# Supplementary material for: Person-centred support programme (RESPECT intervention) for women with breast cancer treated with endocrine therapy: a feasibility study
Source: PubMed Central journal article supplement — BMJ Open. 2022 Oct 5;12(10):e060946. doi: 10.1136/bmjopen-2022-060946 (PMC9535178; doi:10.1136/bmjopen-2022-060946), 2022-10-05
Supplement: bmjopen-2022-060946.draft_revisions.pdf [file bmjopen-2022-060946.draft_revisions.pdf]

# BMJ Open

BMJ Open is committed to open peer review. As part of this commitment we make the peer review history of every article we publish publicly available.

When an article is published we post the peer reviewers' comments and the authors' responses online. We also post the versions of the paper that were used during peer review. These are the versions that the peer review comments apply to.

The versions of the paper that follow are the versions that were submitted during the peer review process. They are not the versions of record or the final published versions. They should not be cited or distributed as the published version of this manuscript.

BMJ Open is an open access journal and the full, final, typeset and author-corrected version of record of the manuscript is available on our site with no access controls, subscription charges or pay-per-view fees (<http://bmjopen.bmj.com>).

If you have any questions on BMJ Open's open peer review process please email [info.bmjopen@bmj.com](mailto:info.bmjopen@bmj.com)

# BMJ Open

## **A person-centered support program (RESPECT intervention) for women treated with endocrine therapy: A feasibility study**

|                               |                                                                                                                                                                                                                                                                                               |
|-------------------------------|-----------------------------------------------------------------------------------------------------------------------------------------------------------------------------------------------------------------------------------------------------------------------------------------------|
| Journal:                      | <i>BMJ Open</i>                                                                                                                                                                                                                                                                               |
| Manuscript ID                 | bmjopen-2022-060946                                                                                                                                                                                                                                                                           |
| Article Type:                 | Original research                                                                                                                                                                                                                                                                             |
| Date Submitted by the Author: | 11-Jan-2022                                                                                                                                                                                                                                                                                   |
| Complete List of Authors:     | Ahlstedt Karlsson, Susanne; Sahlgrenska Academy, Health Care Sciences<br>Henoch, Ingela; Goteborgs Universitet, Institute of health and care<br>sciences<br>Olofsson Bagge, Roger; Sahlgrenska Academy, Clinical Sciences<br>Wallengren, Catarina ; Sahlgrenska Academy, Health Care Sciences |
| Keywords:                     | Breast tumours < ONCOLOGY, Quality in health care < HEALTH<br>SERVICES ADMINISTRATION & MANAGEMENT, QUALITATIVE RESEARCH                                                                                                                                                                      |
|                               |                                                                                                                                                                                                                                                                                               |

SCHOLARONE™  
Manuscripts

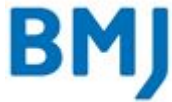

I, the Submitting Author has the right to grant and does grant on behalf of all authors of the Work (as defined in the below author licence), an exclusive licence and/or a non-exclusive licence for contributions from authors who are: i) UK Crown employees; ii) where BMJ has agreed a CC-BY licence shall apply, and/or iii) in accordance with the terms applicable for US Federal Government officers or employees acting as part of their official duties; on a worldwide, perpetual, irrevocable, royalty-free basis to BMJ Publishing Group Ltd ("BMJ") its licensees and where the relevant Journal is co-owned by BMJ to the co-owners of the Journal, to publish the Work in this journal and any other BMJ products and to exploit all rights, as set out in our [licence](#).

The Submitting Author accepts and understands that any supply made under these terms is made by BMJ to the Submitting Author unless you are acting as an employee on behalf of your employer or a postgraduate student of an affiliated institution which is paying any applicable article publishing charge ("APC") for Open Access articles. Where the Submitting Author wishes to make the Work available on an Open Access basis (and intends to pay the relevant APC), the terms of reuse of such Open Access shall be governed by a Creative Commons licence – details of these licences and which [Creative Commons](#) licence will apply to this Work are set out in our licence referred to above.

Other than as permitted in any relevant BMJ Author's Self Archiving Policies, I confirm this Work has not been accepted for publication elsewhere, is not being considered for publication elsewhere and does not duplicate material already published. I confirm all authors consent to publication of this Work and authorise the granting of this licence.

1  
2  
3 **A person-centered support program (RESPECT intervention) for women treated with**  
4  
5  
6  
7 **endocrine therapy: A feasibility study**  
8  
9  
10

11 Ahlstedt Karlsson, Susanne<sup>1,2</sup> Orcid ID: 0000-0001-5436-5476; Henoeh, Ingela<sup>2</sup> Orcid ID: 0000-0002-1987-  
12 5419; Olofsson Bagge, Roger<sup>1,3</sup> Orcid ID: 0000-0001-5795-0355; Wallengren, Catarina<sup>2</sup> Orcid ID: 0000-0002-  
13 8124-1572  
14  
15

16  
17  
18 <sup>1</sup>Department of Surgery, Sahlgrenska University Hospital, Gothenburg, Sweden.

19 <sup>2</sup>Institute of Health and Care Sciences, Sahlgrenska Academy at the University of Gothenburg, University of  
20 Gothenburg, Gothenburg, Sweden

21 <sup>3</sup>Department of Surgery, Institute of Clinical Sciences, Sahlgrenska Academy at the University of Gothenburg,  
22 Gothenburg, Sweden.  
23  
24

25  
26 # Correspondence to: Ahlstedt Karlsson, Institute of Health and Care Sciences, Sahlgrenska Academy at the  
27 University of Gothenburg, University of Gothenburg, Gothenburg, Sweden

28  
29 E-mail: susanne.ahlstedt.karlsson@gu.se

30 Telephone: +46 704153666  
31  
32  
33  
34  
35  
36

37  
38 Keywords: Breast cancer, endocrine therapy, intervention, feasibility, person-centered support program  
39  
40  
41

42 Wordcount: 5789  
43  
44  
45  
46  
47  
48  
49  
50  
51  
52  
53  
54  
55  
56  
57  
58  
59  
60



## ABSTRACT

**Objective:** The aim of the study was to explore the feasibility of the trial design and patient acceptability of the intervention and outcome measures and to provide data to estimate the parameters required to design the final intervention.

**Design:** A controlled before-and-after design following the CONSORT 2010 statement for feasibility trials.

**Setting:** A surgical out-patient clinic in Sweden.

**Participants:** Forty-one patients (aged 47 – 85) treated with endocrine therapy.

**Interventions:** Eligible patients were assigned to the control group or intervention group, which included individual education material, an individualized learning plan, and a personalized reminder letter using a person-centered approach. The intervention could be delivered as a telephone or digital follow-up.

**Outcome measures:** The aims were to determine the recruitment rate, assess the rate of retention, explore whether the intervention was delivered according to the protocol, assess the preferred form of educational support, rate of education sessions, length per education session, and length between each education session, determine the distribution of education materials, and assess completion rates of patient-report instruments, including the General Self-efficacy Scale, the Quality of Care from the Patient's Perspective questionnaire, and the Memorial Symptom Assessment Scale.

**Results:** Eighty-six percent of the patients in the intervention group completed the intervention and completed the questionnaires three months after their inclusion. The call attendance was 90%. During the intervention, the nurse navigator was compliant with the intervention protocol. For self-efficacy, symptoms, and quality of care, there were no differences in effect size between the control and intervention groups.

### Conclusions

This intervention seems to be feasible and acceptable among patients, and a telephone follow-up intervention also seems to be the preferred way to administer the intervention.

## Article summary

### *Strengths and limitations of this study*

- This is the first study to investigate the feasibility of a person-centered support model for patients with endocrine therapy.
- This study uses the CONSORT 2010 statement for feasibility trials.
- This study reports the recruitment rate, assess the rate of retention, explore whether the intervention was delivered according to the protocol, assess the preferred form of educational support, rate of education sessions, length per education session, and length between each education session, determine the distribution of education materials, and assess completion rates of patient-report instruments.
- Due to COVID-19 pandemic face-to-face sessions was restricted.
- This study did not identify when the intervention should stop.

## A person-centered support program (RESPECT intervention) for women treated with endocrine therapy: A feasibility study

### BACKGROUND

For women diagnosed with hormone receptor-positive breast cancer, endocrine therapy (ET), i.e., the use of tamoxifen or aromatase inhibitors, is recommended for at least five years to reduce recurrence and rates of mortality<sup>1</sup>. A previous study reported that up to 91% of patients experience side effects from ET<sup>2</sup>, such as sleeping difficulties, hot flashes<sup>3 4</sup> and musculoskeletal symptoms<sup>5</sup>. Difficulties in managing these side effects have been reported to be obstacles to staying in treatment<sup>6</sup>. Other challenges that have been identified include older age<sup>7</sup>, medicine costs, or a general dislike of taking a regular medicine<sup>8</sup>. As ET is a long-lasting treatment, women may request support in managing challenges<sup>9</sup>. To manage challenges with ET, a partnership with health care professionals could be appropriate, as a previous study<sup>10</sup> identified that women with ET want to be able to manage their treatment but need guidance to do so.

Regarding the management of ET-related symptoms, previous studies have investigated the effect of symptom management interventions for patients prescribed ET<sup>11-13</sup>. A study identified management needs for ET symptoms, emotional needs, and needs for information acquisition and found that patients' relationship with health care providers was important<sup>12</sup>. A combination of information with cognitive behavioral therapy (CBT) to manage the side effects of tamoxifen showed successful results for the development of management skills in patients who were unable to stay in treatment<sup>11</sup>. Managing a disease and its additional challenges requires self-care knowledge and skills gained from a partnership with health care professionals<sup>14</sup>. Self-care involves the ability to both care for oneself and to achieve, promote and maintain optimal health<sup>15</sup>. A common feature of self-care and person-centered care (PCC) is an ability to view humans as the agent and the subject of action<sup>16 17</sup>. To include aspects of treatment important to the individual patient, such as different side effects, health care structures, fear of side effects, and lack of management skills and for support, a person-centered support program was developed<sup>10</sup>. As self-care requires knowledge and skills<sup>14</sup>, PCC could be appropriate for use in a support

1  
2  
3 program. Self-care requisites are described as all elements that individuals need at all stages in life to care for  
4 themselves, i.e., air, food, water; self-care requisites also depend on how individuals react to illness<sup>14</sup>. PCC can  
5 be a preferable way of identifying those requisites, as they can be identified in the narratives and used in the  
6 patient-health care provider partnership<sup>17</sup>. Patients are often motivated to engage in self-care, as they have  
7 personal interest in acquiring requisite knowledge and skills for performing self-care operations to reach their  
8 intended health goals<sup>14</sup>. It has been shown that when self-care capabilities increase<sup>18</sup>, self-efficacy and  
9 adherence to ET also increase<sup>19 20</sup>. Self-efficacy constitutes the self-image of the person and affects how people  
10 experience and behave in specific situations<sup>21</sup>. Previous studies using PCC have improved patients' self-efficacy  
11 22-24.

12  
13  
14  
15  
16  
17 It is important for patients to not only identify accurate information but also assess and integrate the information  
18 to gain increased knowledge, self-efficacy, and self-care skills<sup>10</sup>. Moreover, in addition to the emotional needs  
19 identified by Kim et al. (2020), it is important to assess the amount of needed information and to explore  
20 patients' understanding of the diagnosis and treatment<sup>25</sup>. For written health education materials to be effective,  
21 the patient must be able to apply the new information to her own life. This can be achieved by providing  
22 understandable examples and presenting the information so the patient sees its relevance to her situation<sup>26</sup>, as  
23 the ultimate reason for educating patients is to improve health<sup>27</sup>.

24  
25  
26  
27  
28 A previous study developed a person-centered support program in collaboration among patients, health care  
29 professionals, researchers and managers with ET experience<sup>10</sup> and need to be tested in a feasibility study using  
30 the TIDieR checklist<sup>28</sup> and the CONSORT 2010 statement<sup>29</sup>. Previous studies have used feasibility studies prior  
31 to conducting a study in a larger setting<sup>9 30</sup>. The intervention was developed to encourage patients to be more  
32 actively involved in their care and wellbeing as partners with their nurse navigator<sup>10</sup>.

### 33 34 35 36 37 **Aim**

38 In this feasibility trial, the aim was to explore the feasibility of the study design and the patient acceptability of  
39 the Person-centered Support Program Endocrine Therapy (RESPECT) intervention and outcome measures and to  
40 provide data to estimate the parameters required to design the final intervention.

41  
42  
43  
44 The feasibility outcomes were as follows:

- 45 1. Determine recruitment rate
- 46 2. Assess the rate of retention
- 47 3. Explore whether the RESPECT intervention was delivered according to the protocol
- 48 4. Assess the preferred form of educational support
- 49 5. Assess the rate of education sessions
- 50 6. Assess the length per education session
- 51 7. Assess the length between each education session
- 52 8. Determine the distribution of education materials
- 53 9. Assess the completion rates of patient-report instruments, including of the General Self-efficacy Scale  
54 (GSE), the Quality from the Patient's Perspective questionnaire (QPP), and the Memorial Symptom  
55 Assessment Scale (MSAS)
- 56  
57  
58  
59  
60

- 1  
2  
3 10. Investigate whether self-efficacy, symptoms and satisfaction with care can be assessed appropriately by  
4 using the patient-report GSE, QPP, and MSAS.  
5  
6  
7  
8  
9  
10  
11  
12

## 13 **METHODS**

### 14 15 16 17 *Study design*

18 This was a feasibility trial using a controlled before-and-after design <sup>31</sup> to investigate the feasibility of the  
19 intervention, a person-centered support program aimed at empowering patients prescribed ET to manage ET-  
20 related symptoms and problems.  
21  
22

### 23 *Patient and public involvement*

24 Patients and health care professionals was involved in the design and development of the person-centered  
25 support model <sup>10</sup>. However, there was no patient involvement in the evaluation of the person-centered support  
26 model presented in this study.  
27  
28  
29

### 30 *Participants*

31  
32  
33 Based on the recommendations for feasibility studies and an expected attrition rate of 20%, the sample size was  
34 set to 20 participants in each group <sup>32</sup>. Between September 2020 and June 2021, 66 potential female patients  
35 from one outpatient clinic at one university hospital in Sweden were identified as eligible for inclusion. The  
36 inclusion criteria were women > 18 years who had been diagnosed with breast cancer and treated with ET after  
37 surgery. Patients receiving adjuvant chemotherapy were excluded. All patients were contacted by a nurse  
38 navigator and were invited by telephone to participate in the study approximately three weeks after their surgery  
39 (Figures 1 and 2; Table 1). All patients were given verbal and written information about the study, and after  
40 agreeing to have an informed consent form sent to them by mail, they all provided written, informed consent. If  
41 the patient agreed to participate, she sent the informed consent form back using a prepaid envelope.  
42  
43  
44  
45  
46  
47

48 **Please insert Figure 1 and 2 about here.**  
49  
50  
51  
52  
53  
54  
55  
56  
57  
58  
59  
60

Table 1. Demographic and clinical characteristics of the participants in the control group (n=20) and intervention group (n=21) in the RESPECT project.

| <b>Demographic characteristics</b>    | <b>Control group n=20</b> | <b>Intervention group n=21</b> |
|---------------------------------------|---------------------------|--------------------------------|
| <i>Median age, years (range)</i>      | 65 (50-85)                | 66 (47-79)                     |
| <i>Civil status, n (%)</i>            |                           |                                |
| <i>Married/cohabiting</i>             | 12 (63%)                  | 16 (76%)                       |
| <i>Single</i>                         | 8 (37%)                   | 5 (23%)                        |
| <i>Ancestral homeland, n (%)</i>      |                           |                                |
| <i>Sweden</i>                         | 16 (80%)                  | 18 (86%)                       |
| <i>Scandinavian countries</i>         | 1 (5%)                    | 1 (5%)                         |
| <i>Europe</i>                         | 1 (5%)                    | 2 (10%)                        |
| <i>Outside Europe</i>                 | 1 (5%)                    | 0 (0%)                         |
| <i>Education, n (%)</i>               |                           |                                |
| <i>University</i>                     | 9 (45%)                   | 10 (48%)                       |
| <i>High school</i>                    | 8 (40%)                   | 8 (38%)                        |
| <i>Elementary school</i>              | 3 (15%)                   | 3 (14%)                        |
| <i>Radiation therapy, n (%)</i>       | 16 (80%)                  | 21 (100%)                      |
| <i>Chemotherapy, n (%)</i>            | 0 (0%)                    | 0 (0%)                         |
| <i>Tumor size, median mm (range)</i>  | 14 (4-45)                 | 12 (1-19)                      |
| <i>Breast surgery</i>                 |                           |                                |
| <i>Mastectomy</i>                     | 4 (20%)                   | 2 (10%)                        |
| <i>Partial mastectomy</i>             | 15 (75%)                  | 19 (90%)                       |
| <i>Axillary lymph node dissection</i> | 1 (0.5%)                  | 0 (0%)                         |
| <i>Tamoxifen, n (%)</i>               | 9 (45%)                   | 9 (43%)                        |
| <i>Aromatase inhibitor, n (%)</i>     | 11 (55%)                  | 12 (57)                        |

*Control group*

1  
2  
3 Usual care (UC) involves patients being allocated a nurse navigator (an experienced undergraduate nurse or  
4 postgraduate nurse in surgical care), as the Swedish Patient Act <sup>33</sup> gives patients a statutory right to permanent  
5 contact with health care. Patients can contact the nurse navigator all weekdays by telephone or by using a  
6 national digital tool, 1177.se <sup>34</sup>. All patients receive written information as a brochure or a digital “My care and  
7 rehabilitation plan” when diagnosed with breast cancer. Support in usual care aims to give patients information  
8 about their state of health, available methods for examinations, care, and treatments, as well as information about  
9 at which time point she can expect to receive care and a permanent contact with the health care. The nurse  
10 navigator writes down the information that is available before surgery, such as tumor characteristics and surgery  
11 preparations. The patient can also write down questions to bring to the oncoming appointments. Usual care is  
12 based on patients’ initiative to make contact (Figure 3).  
13  
14  
15  
16  
17  
18  
19  
20

### 21 *Intervention group*

22 The intervention was provided in a surgical outpatient clinic in western Sweden from December 2020-June  
23 2021. The goal of the intervention is to empower patients prescribed ET to manage ET-related symptoms and  
24 problems. In addition to the UC, a 12-week intervention was offered to the participants in the intervention group  
25 (Figure 3):  
26  
27  
28  
29

#### 30 *Step 1- Individual education material*

31 Using a PCC approach <sup>17</sup>, the nurse navigator listened to patients narratives regarding their individual needs for  
32 knowledge and understanding, resources, goals and needs for support from the nurse navigator. The timing of  
33 supplying individual educational materials depended on the individual patient’s needs, resources and goals  
34 during the 12-week intervention. Mutual trust was demonstrated, and the relationship between the patient and  
35 her nurse navigator was reinforced through the assessment of the commonly agreed-upon individualized learning  
36 plan <sup>35</sup> study.  
37  
38  
39  
40

#### 41 *Step 2 - An individualized learning plan (ILP)*

42 An ILP was established depending on the individual patients’ needs for knowledge and understanding about ET  
43 and considering the patients’ resources, goals, and needs for education material and support from the nurse  
44 navigator. In combination with the individual educational materials (step 1), a follow-up plan was made using  
45 telephone and/or digital follow-ups. Physical follow-ups were minimized as the COVID-19 pandemic was  
46 ongoing. The number of follow-up sessions and whether relatives were to be included during the 12-week  
47 intervention were agreed upon between the patient and the nurse navigator. Patients could also refuse all  
48 education material and other materials and only use only the nurse navigator for support.  
49  
50  
51  
52

#### 53 *Step 3 – A personalized reminder letter*

54 The third part of the support program was a personalized reminder letter after three months including contact  
55 information and an invitation for patients to make contact if needed.  
56  
57  
58  
59  
60

**Please insert Figure 3 about here**

### Education of the nurse navigator in the intervention

The aim of the education was to increase the nurse navigator's knowledge and understanding of ET, its problems and symptom management using PCC. Microteaching<sup>36,37</sup> sessions and seminars were used; the microteaching sessions were adapted to the specific needs of knowledge about endocrine therapy, side effects<sup>10</sup>, pedagogy<sup>38</sup> and PCC<sup>17,39</sup>, and the chosen approach was intended to help the nurse navigator take responsibility for her own learning, i.e., student-centered learning<sup>40</sup>. Additionally, practical exercises were used, as the nurse navigator was able to practice her knowledge and understanding in a care setting and reflect on it, and the nurse navigator's curiosity was used as a motivator to gain knowledge<sup>38</sup> (Table 2).

Table 2. Description of the education of the nurse navigator.

| <b>Before Lecture:</b> The nurse navigator is asked to specifically reflect on the following in the care setting:<br><i>Problems with endocrine therapy</i><br><i>Symptom management</i><br><i>Cocreation with patients, barriers, facilitators.</i> |                                                                                                                                                            |                                                                                                                                                                                                                                                                                                                                   |                                                                         |
|------------------------------------------------------------------------------------------------------------------------------------------------------------------------------------------------------------------------------------------------------|------------------------------------------------------------------------------------------------------------------------------------------------------------|-----------------------------------------------------------------------------------------------------------------------------------------------------------------------------------------------------------------------------------------------------------------------------------------------------------------------------------|-------------------------------------------------------------------------|
| Sessions                                                                                                                                                                                                                                             | Content                                                                                                                                                    | Learning outcomes                                                                                                                                                                                                                                                                                                                 | Learning activities                                                     |
| 1                                                                                                                                                                                                                                                    | Core principles about ET, including side effects of endocrine therapy (ET) and symptom management described in research.<br><br>Symptom management theory. | -Describe symptom management methods.<br>-Suggest strategies for symptom management during ET.                                                                                                                                                                                                                                    | Clinical case discussions, microteaching sessions, dialogs, reflection. |
| <b>Before Lecture:</b> The nurse navigator is asked to reflect on practical situations in the care setting when <i>applying dialog</i> and <i>person-centered care (PCC)</i> .                                                                       |                                                                                                                                                            |                                                                                                                                                                                                                                                                                                                                   |                                                                         |
| Session                                                                                                                                                                                                                                              | Content                                                                                                                                                    | Learning outcomes                                                                                                                                                                                                                                                                                                                 | Learning activities                                                     |
| 2                                                                                                                                                                                                                                                    | Pedagogical theory.                                                                                                                                        | - Describe pedagogic strategies using dialog to increase patients' self-care.<br>- Describe pedagogical strategies to increase patient participation.<br>- Describe dialogical methodology that strengthens patient participation.<br>-Evaluate whether chosen pedagogical strategies increase patients' self-management ability. | Clinical case discussions, microteaching sessions, dialogs, reflection. |
| <b>Before Lecture:</b> The nurse navigator is asked to reflect on practical situations in the care setting using knowledge from Session 2 and <i>relate to PCC</i> in a care setting.                                                                |                                                                                                                                                            |                                                                                                                                                                                                                                                                                                                                   |                                                                         |
| Session                                                                                                                                                                                                                                              | Content                                                                                                                                                    | Learning outcomes                                                                                                                                                                                                                                                                                                                 | Learning activities                                                     |
| 3                                                                                                                                                                                                                                                    | PCC in the clinical care setting.                                                                                                                          | -Describe PCC.                                                                                                                                                                                                                                                                                                                    | Clinical case discussions, microteaching sessions, dialogs, reflection. |
| <b>Before Lecture:</b> The nurse navigator evaluates the <i>gained knowledge about PCC</i> in a practical situation in the care setting.                                                                                                             |                                                                                                                                                            |                                                                                                                                                                                                                                                                                                                                   |                                                                         |
| Session                                                                                                                                                                                                                                              | Content                                                                                                                                                    | Learning outcomes                                                                                                                                                                                                                                                                                                                 | Learning activities                                                     |
| 4                                                                                                                                                                                                                                                    | The three intervention components, i.e., individual                                                                                                        | -Explain the components of the intervention.                                                                                                                                                                                                                                                                                      | Clinical case discussions, dialogs, reflection.                         |



|                                                                                                                                                                                                                                                                                                                                                                                                                                                     |                                                                                                                                                                                                                                           |  |  |
|-----------------------------------------------------------------------------------------------------------------------------------------------------------------------------------------------------------------------------------------------------------------------------------------------------------------------------------------------------------------------------------------------------------------------------------------------------|-------------------------------------------------------------------------------------------------------------------------------------------------------------------------------------------------------------------------------------------|--|--|
|                                                                                                                                                                                                                                                                                                                                                                                                                                                     | education material, individualized learning plan, and a personalized reminder letter (Ahlstedt Karlsson, et al. submitted), with a starting point in the nurse navigator's experience from a practical situation in the clinical setting. |  |  |
| <b>After Lecture:</b> With a starting point in the newly gained knowledge, <i>apply PCC, knowledge about ET, pedagogical theory and the three components</i> in the intervention in a care setting.                                                                                                                                                                                                                                                 |                                                                                                                                                                                                                                           |  |  |
| <b>Proficiency goal after completed education:</b><br>The nurse navigator can:<br>- Evaluate whether the proposed symptom management strategies increase the patient's management of ET-related symptoms.<br>- Assess whether the patient's need for care was met.<br>- Review and evaluate whether selected pedagogical strategies strengthen the patient's self-care ability.<br>- Evaluate the patient's participation in ET symptom management. |                                                                                                                                                                                                                                           |  |  |
| <b>Evaluation ability after completed education:</b><br>The nurse navigator can:<br>- Suggest strategies for managing symptoms in relation with ET.<br>- Together with the patient, identify care needs.<br>- Apply pedagogical strategies that strengthen patients' self-care ability.<br>- Apply dialogical methodology that strengthens patients' participation.                                                                                 |                                                                                                                                                                                                                                           |  |  |

Abbreviation: Person-centered care- PCC, Endocrine therapy - ET

#### *Feasibility outcomes*

Craig et al. (2013) described several challenging variables that can affect an intervention's results and conclusions. The feasibility classification (process, resources, scientific) and feasibility criteria reported by Thabane et al. (2019) and Lancaster et al. (2004) were used to collect feasibility data. To determine whether the chosen feasibility criteria were successful<sup>41</sup>, criteria for success were stated according to the CONSORT 2010 statement<sup>29</sup>;

The intervention process was assessed with the feasibility criteria as follows:

1. Recruitment was studied to determine whether the patients were willing to participate in the study. The criterion was determined to be successful if the percentage rates of recruitment were > 70%.
2. Retention was studied to determine whether the patients were willing to remain for the entire study period, i.e., 12 weeks. The criterion was determined to be successful if the percentage rates of retention were >70%.
3. Compliance with the intervention protocol was studied to determine if the patients were offered the three parts of the planned intervention, i.e., education materials, learning plan and personalized letter. The criterion was determined to be successful if all three parts of the intervention were offered.

The resources used in the intervention were assessed with the feasibility criteria as follows:

4. Form of educational support was studied to determine the preferred form of educational support during the intervention period, i.e., 12 weeks. The criterion was determined to be successful if all three forms of educational support (face-to face, telephone, and computer) were requested by the patients.
5. Number of educational sessions was studied to determine how many educational opportunities the patient used during the intervention period, i.e., 12 weeks. The criterion determined to be successful if no more than four education sessions were used by each patient.

6. Length per education session was studied to determine how much time the patient used in each education session. The criterion was determined to be successful if < 45 minutes was used per education session.
7. Length between each education session was studied to determine how often women wanted to have education opportunities. The criterion was determined to be successful if there were no more than four weeks between each education session.
8. Distribution of education materials was studied to determine how much of intervention materials the patients received during the study. The criterion was determined to be successful if the distribution of education materials was >70%.

The scientific challenges of the intervention were assessed with the feasibility criteria as follows:

9. Completion rate of questionnaires was studied to determine if the patient was willing to answer the questionnaires, i.e., at baseline and 12 weeks. The criterion was determined to be successful if the percentage rates of patient completion of questionnaires were > 70% at baseline and 12 weeks.
10. The estimated treatment effect was studied to determine if the selected instruments were appropriate to measure patients' self-efficacy, quality of care, and symptoms. The criterion was determined to be successful if there were any changes in the self-report measures between the first and second points of measurement.

#### *Data collection*

Data were collected from September 2020 – June 2021. Feasibility outcomes were collected during the whole study period by the trial leader and were documented directly after every session in a trial log to secure the data collection<sup>42</sup>. The trial log contained a summary of the results of the feasibility criteria using Excel (Microsoft® Excel, version 16.50).

The three questionnaires were distributed by mail to patients in the control group (between September 2020 and December 2020) and the intervention group (December 2020 and March 2021). These three questionnaires were distributed at baseline, i.e., at the start of the intervention and ET, and three months after the start of the intervention.

The first questionnaire was the GSE, a 10-item (short form) psychometric scale that assesses optimistic self-beliefs to cope with a variety of demands in life. The GSE is a validated instrument that has been translated into Swedish<sup>43</sup> and has previously been used with breast cancer patients<sup>44</sup>. The total score is the mean value of respondents' answer to all items. High scores imply higher self-efficacy.

The second questionnaire was the QPP, a 45-item instrument that measures satisfaction in four dimensions: medical-technical competence, physical-technical conditions, identity-oriented approach, and sociocultural atmosphere<sup>45 46</sup>. Moreover, to identify patients' views of whether the health care was adapted to their needs rather than health care routines, three items (*I was given the possibility to tell the medical staff how I experienced*

1  
2  
3 *my situation; I was given the opportunity to participate in the planning of my care/treatment; I received the*  
4 *information I needed to be able to participate in decisions about my own care and treatment)* that were  
5  
6 previously used by the Swedish SOM institute were added <sup>47</sup>. To calculate the execution index, each question is  
7 scored in terms of actual experience and subjective importance, each on a four-point Likert scale. The execution  
8 index score ranges from 1–7, where one is inadequate quality of care from the patient perspective and seven is  
9 good quality of care <sup>48</sup>.

10  
11  
12  
13 The last questionnaire was the MSAS, a 32-question instrument for patients to rate their symptoms on a 5-point  
14 Likert scale <sup>49 50</sup>. The instrument has been validated in Swedish breast cancer patients <sup>50</sup> and has previously been  
15 used with breast cancer patients <sup>44</sup>. The total MSAS score is the average of the symptom scores for all 32  
16 symptoms. Each symptom score is an average of the dimensions and includes the number of symptoms, how  
17 often patients experienced them, the severity of the symptoms and the cause of distress.

18  
19  
20  
21 Patients included in the study responded to the questionnaires and returned the questionnaires in a prepaid  
22 envelope.

## 23 24 25 **Analysis**

26 To analyze demographic variables, we used descriptive statistics (number, percent, mean, range). We calculated  
27 the percentage rates of recruitment, retention, and completion of questionnaires. We calculated the number,  
28 median and range of educational sessions, distribution of education materials, length per education session, and  
29 length between each education session. As the study was a feasibility test, no hypothesis testing was applied <sup>51</sup>,  
30 but p-values were calculated and presented to value their relevance in an RCT. Baseline characteristic were  
31 compared by the chi-squared test for categorical characteristics. Descriptive statistical analyses and the Mann-  
32 Whitney U-test were performed to identify the experience of symptoms, satisfaction with care and perceived  
33 self-efficacy. P-values below .05 were considered statistically significant, and all analyses were performed with  
34 IBM® SPSS® Statistics version 27 (IBM SPSS Statistics for Macintosh, Version 27.0).

## 35 36 37 38 39 40 41 **RESULTS**

### 42 43 *Participant demographics*

44  
45 In the control group, the median age was 65 years, 80% of the participants were born in Sweden, 63% were  
46 cohabiting and 45% were prescribed tamoxifen. In the intervention group, the median age was 66 years, 86%  
47 were born in Sweden, 76% were cohabiting and 43% were prescribed tamoxifen. One hundred percent of the  
48 patients in both groups had invasive breast cancer (Table 1).

### 49 50 51 *Feasibility classification and criteria*

52 Feasibility outcomes are presented in line with the CONSORT 2010 statement as follows:

#### 53 54 55 *1. Recruitment*

56 In the control group, 22 eligible patients were screened, and 20 were approached at the clinic, of whom 20  
57 consented to participate (100%). In the intervention group, 44 patients were screened, of whom 24 were  
58 approached and 21 consented to participate (88%) (Table 1). Of the three patients who did not consent to  
59  
60

1  
2  
3 participate in the intervention group, two indicated the number of questions in the questionnaires to be a reason  
4 for not participating. One patient gave no reason for not participating (Figure 1, 2).

#### 6 2. Retention

7 In the intervention group, 20 patients completed (95%). One patient dropped out from the intervention because  
8 the study reminded her about the breast cancer surgery, which she was trying to forget about (Figure 1).

#### 10 3. Compliance with the intervention protocol

11 In the first session, the patients' needs for knowledge and understanding, resources, goals and support from the  
12 nurse navigator were identified in their narratives. Education material was offered accordingly using a written  
13 agreement between the patient and nurse navigator and documented in the ILP. Patients decided with the nurse  
14 navigator whether they required knowledge. If they required knowledge, they stated when they wanted the  
15 education materials and which parts. Their need for knowledge ranged between having everything sent after the  
16 first session and having some of the education material sent at the end of the intervention. Patients could state  
17 that they did not want any education material at the start of the intervention but would reevaluate their needs  
18 during the 12 weeks of the intervention. However, since the ILP was sent home with the patients, any changes in  
19 the plan had to be documented by the patient herself. Two patients received the education materials sent to them  
20 but did not want to read it, just to have it if they wanted to read it later. Seven patients did not want the  
21 intervention for the full 12-week period (33%) but stated that they would make contact if they needed further  
22 information during the intervention. One patient wanted her partner to be included. Two patients in the  
23 intervention group did not answer the telephone at the scheduled session, making the call attendance 90%. One  
24 patient rescheduled a session due to personal reasons. Thirty-three percent of the patients did not want follow-up  
25 sessions during the full 12-week intervention. As 90% of the patients wanted all educational materials, 10% of  
26 the patients used only the nurse navigator for support and one hundred percent of the patients received a  
27 personalized reminder letter (Table 3).

28 Contact information and an invitation for patients (100%) to make contact if needed were sent after 12 weeks in  
29 the personalized letter. None of the patients made contact after the 12-week intervention as shown in Table 3.

#### 32 4. Resources

33 None of the patients wanted to have face-to-face sessions. In fact, several of the patients stated that it was  
34 important to not have to come for appointments at the hospital. Reasons for not wanting to come to the hospital  
35 were related to the COVID-19 pandemic as well as to perceptions of appointments at the hospital being time  
36 consuming. All patients but one preferred telephone sessions (Table 3). If a patient had asked for a face-to-face  
37 follow-up session, this would have been managed accordingly, with arrangements made to ensure safety in the  
38 context of the COVID-19 pandemic. Face-to-face meetings at the hospital with patients were not prohibited but  
39 restricted. However, no patient-nurse navigator pairs participated in a face-to-face session; had they done so,  
40 both the patient and the nurse navigator would have had to wear face masks, and the nurse navigator would have  
41 also had to wear a plastic face shield to prevent transmission of the COVID-19 virus.

#### 43 5. Number of educational sessions

44 The number of educational sessions ranged between two and four sessions (Table 3).

#### 46 6. Length per education session

47 Telephone support sessions ranged between 5 and 60 minutes, and digital support ranged between 30 and 45  
48 minutes (Table 3).

### 7. Length between education sessions

The length between follow-up sessions ranged between 1 and 6 weeks, with a median time of 4 weeks. However, the length between the first and second session had a median time of 2 weeks (Table 3).

### 8. Distribution of education materials

All patients (100%) wanted part 1 of the individual education material. Ninety-five percent of the patients wanted part 2 of the individual education material, and 90% wanted parts 3-4 of the individual education material. Information about tamoxifen or aromatase inhibitors was wanted by 95% of the patients. Additionally, some additional educational material was distributed about sleep advice and complementary medicine (Table 3).

### 9. Completion rate of questionnaires

In the control group, 95% completed the first questionnaires at baseline, as one patient questionnaire was lost in the mail. At three months, 95% of patients responded to their surveys. In the intervention group, 100% responded to the first questionnaires, and 86% responded to the follow-up questionnaires after three months (Table 3). At the first measurement point, two reminder messages were sent to three patients in the intervention group before one patient was recorded as a drop out. At the second measurement point, one reminder message was sent to six patients three weeks after the questionnaires were sent. A second reminder message was sent approximately two weeks later to five patients, and as two patients did not return their questionnaires, they were recorded as drop-outs. Two patients in the intervention group did not answer the telephone at the scheduled session, making the call attendance 90%. One patient rescheduled a session due to personal reasons (Table 3).

### 10. Estimated treatment effect

Differences between the control and intervention groups in perceived self-efficacy (0.5 and 0,  $p=0.731$ ) and reported number of symptoms according to the MSAS (2 and 1,  $p=0.724$ ) after 3 months were observed (Figure 4; Table 4). Quality of care was measured using QPP. Overall, the patients in the control group had higher quality of care index scores than patients in the intervention group (Table 5).

**Please insert Figure 3, 4 about here**

Table 3. Resource needs for the intervention

| <b>RESPECT</b>                                                                                   |         |
|--------------------------------------------------------------------------------------------------|---------|
| <b>Distributed educational material</b>                                                          |         |
| Individual educational material <i>Part 1</i> , <i>n</i>                                         | 21      |
| Individual educational material <i>Part 2</i> , <i>n</i>                                         | 20      |
| Individual educational material <i>Part 3</i> , <i>n</i>                                         | 19      |
| Individual educational material <i>Part 4</i> , <i>n</i>                                         | 19      |
| Individual educational material<br>Information about tamoxifen or aromatase inhibitors, <i>n</i> | 20      |
| Additional educational material from the patient needs:<br>Complementary medicine, <i>n</i>      | 1       |
| Sleep advice, <i>n</i>                                                                           | 1       |
| Recommendations about internet sites:<br>Sleep advice, <i>n</i>                                  | 2       |
| <b>Form of education and educational sessions per patient</b>                                    |         |
| Face to face ( <i>n</i> =0), median (range)                                                      | 0 (-)   |
| Telephone ( <i>n</i> =20), median (range)                                                        | 3 (2-4) |
| Digital ( <i>n</i> =1), median (range)                                                           | 1 (1)   |

|                                                                                                                                                                                                                                                                                                                                                                                                                                                                                               |                                                   |
|-----------------------------------------------------------------------------------------------------------------------------------------------------------------------------------------------------------------------------------------------------------------------------------------------------------------------------------------------------------------------------------------------------------------------------------------------------------------------------------------------|---------------------------------------------------|
| <b>Length (minutes) per sessions</b><br>Telephone (n=20), median (range)<br>Digital (n=1), median (range)                                                                                                                                                                                                                                                                                                                                                                                     | 20 (5-60)<br>30 (30-45)                           |
| <b>Length of time (weeks) between each session</b><br>Telephone follow-up education sessions, weeks, median (range)<br>Digital meeting follow-up sessions, weeks, median (range)<br><i>Follow-up educational session</i><br>Time from 1 <sup>st</sup> session to 2 <sup>nd</sup> session, weeks, median (range)<br>Time from 2 <sup>nd</sup> session to 3 <sup>rd</sup> session, weeks, median (range)<br>Time from 3 <sup>rd</sup> session to 4 <sup>th</sup> session, weeks, median (range) | 4 (1-6)<br>4 (-)<br>2 (1-8)<br>4 (2-8)<br>4 (2-5) |

Table 4. Secondary outcomes. Median differences at baseline and 3 months in the control group and intervention group.

|                              | Control                   |                        |                               | Intervention              |                           |                               | p-value* |
|------------------------------|---------------------------|------------------------|-------------------------------|---------------------------|---------------------------|-------------------------------|----------|
|                              | Baseline No, Median (IQR) | 3 months, Median (IQR) | Change from baseline (median) | Baseline No, Median (IQR) | 3 months No, Median (IQR) | Change from baseline (median) |          |
| SE, median (IQR)             | 31 (27-40)                | 31 (22-39)             | 0.5                           | 30 (26-35)                | 30 (30-38)                | 0                             | 0.731    |
| MSAS, no median (IQR)        | 6 (3-11)                  | 9 (3-18)               | 2                             | 7 (3-13)                  | 10 (5-22)                 | 1                             | 0.724    |
| MSAS, often, median (IQR)    | 11 (2-36)                 | 13 (6-38)              | 7.5                           | 14 (4-25)                 | 15 (7-49)                 | 2                             | 0.504    |
| MSAS, severe, median (IQR)   | 12 (0-26)                 | 13 (5-52)              | 5                             | 10 (3-23)                 | 13 (6-40)                 | 2                             | 0.393    |
| MSAS, distress, median (IQR) | 11 (0-28)                 | 12 (3-30)              | 5.5                           | 8 (2-19)                  | 12 (6-39)                 | 2                             | 0.600    |

\*Mann-Whitney test comparing changes from baseline between the control and intervention groups.

Table 5. Interpretation of the QPP – Percentage agreement in a selection of QPP questions

|                                                                                                  | Control 3 months, n (%) | Intervention 3 months, n (%) |
|--------------------------------------------------------------------------------------------------|-------------------------|------------------------------|
| 13. I received useful information on what I needed to be able to participate in my own care      | 16* (93.75%)            | 17* (88.24%)                 |
| 19. I had adequate information about my medicine, so I understood the effect and how to use them | 18* (77.78%)            | 18* (72.22%)                 |
| 20. I had an opportunity to share my experience with the health care professionals               | 15* (86.67%)            | 17* (82.35%)                 |



|                                                                                          |              |              |
|------------------------------------------------------------------------------------------|--------------|--------------|
| 32. I had a good opportunity to confer in decisions about my own care                    | 14* (85.71%) | 15* (73.33%) |
| 33. I had a good opportunity to participate in my own care                               | 15* (86.67%) | 12* (75.00%) |
| 34. My care was directed by my needs rather than the health care professionals' routines | 16* (100%)   | 17* (82.35%) |

\*Caution: If less than 30, the results should be regarded with caution.

To measure perceived reality concerning the quality of care, every question was phrased as a statement. The response alternatives were given as a scale between 4 (Fully agree) and 1 (Do not agree at all).

Percentage in agreement represents the patients who answered 3 (Mostly agree) and 4 (Fully agree) divided by the total number of patients who answered 1-4 on the question. Answer 5 (Not applicable) is not included.

## DISCUSSION

The results show that the intervention was feasible regarding the classification process and resources. However, it was less feasible regarding scientific challenges. The recruitment methods used seem to be accurate and feasible for an RCT with the aim of empowering patients prescribed ET to manage ET-related symptoms and problems. As a before-and-after design was used, the risk of contamination between groups was minor, as the trial leader had minor clinical contact with the control group.

The most common problems reported by trial investigators have been identified as a lack of adherence to the trial protocol, difficulties with recruitment, data collection and the intervention itself<sup>52</sup>; however, during the intervention, the nurse navigator succeeded in adhering to the trial protocol. Moreover, a weakness in interventions has been reported to be a lack of theoretical approach<sup>53</sup>; to address this challenge, the presented study was founded on a theoretical model<sup>10</sup>. Modeling was used to identify pit falls and barriers<sup>54</sup>. The nurse navigator in the intervention pretested the intervention protocol in clinical meetings with patients before launching the support program. It is crucial for health care professionals to have deep insight into the theory and selected methods to increase patients' required knowledge about ET since no one will adhere to a protocol if the protocol is of no significance<sup>38</sup>. Moreover, a health care context is referred to as a complex adaptive system, as it contains a collection of individuals with the freedom to act in a way that is not always predictable and changes depending on the context. Moreover, a complex adaptive system has fuzzy boundaries, and health care professionals' priorities depend on, for example, their private lives and things they would not sacrifice to follow a study protocol<sup>55</sup>. These challenges need to be addressed, as the intervention is to be applied in a care setting.

Furthermore, as the patients decided, in a partnership with the nurse navigator, how many educational sessions were required, the patient's individuality and resources were a focus, and no patient needed to acquire education than necessary. Moreover, the COVID-19 pandemic has increased the use of digital follow-up, which seems to be well liked among patients<sup>56-58</sup>. Furthermore, face-to-face sessions were not prohibited during the intervention but were restricted due to the COVID-19 pandemic. If a patient would have asked for a face-to-face session, this would have been managed to not put the patient, fellow patients, or the nurse navigator or other health care

1  
2  
3 professionals in danger. However, we cannot specifically state that patients would prefer telephone sessions  
4 under other circumstances, but telephone follow-up seems to be suitable, as patients indicated physical  
5 appointments to be time consuming. A previous study also used telephone follow-up to increase confidence in  
6 controlling illness in patients with chronic obstructive pulmonary disease with positive results in controlling  
7 symptoms ( $p=.028$ )<sup>59</sup>, and telephone follow-ups found to be well liked among registered nurses<sup>60</sup>. A previous  
8 study using PCC also allowed patients to decide the number of follow-up sessions<sup>61</sup>. Thus, this approach could  
9 be a preferable way to administer the intervention and could also be more cost-effective, as patients do not need  
10 to attend more sessions than required; however, it needs to be evaluated further. Furthermore, all health care  
11 professionals do not have a PCC approach, which might affect the responses in the questionnaires and the  
12 interpretation of the results. To manage this, the whole care chain needs to structure their work according to  
13 PCC, as in a previous study<sup>22</sup>.

14  
15  
16  
17  
18  
19  
20 Moreover, the intervention protocol ranged over 12 weeks, as this period has been identified as the most  
21 troublesome for patients with ET<sup>62</sup>, and a previous study identified that the start of the ET period could be  
22 preferable for an intervention<sup>30</sup>. As 67% of the patients wanted education during the full 12-week intervention,  
23 12 weeks is indicated to be a suitable length for a support program in a future RCT. However, an optional  
24 follow-up session after six months, when the patients have more experience with ET, could be appropriate, but  
25 measures would need to be taken to help patients stay focused on ET when responding to the questionnaires. A  
26 later session could also be preferable for patients who do not want to be educated during the first months  
27 undergoing ET<sup>30</sup>.

28  
29  
30  
31  
32 To address scientific challenges, two measurement points were used, baseline and three months after being  
33 prescribed ET. In an RCT, additional measurement points could be added at six and 12 months. However, there  
34 were no differences in self-efficacy between the control and intervention groups; rather, both the control group  
35 and the intervention had high self-efficacy scores at baseline, indicating that the ceiling level was reached.  
36 Higher education implies higher self-efficacy<sup>63</sup> ( $p=.017$ )<sup>64</sup>. In the present study, 45% of the patients in the  
37 control group and 48% of the patients in the intervention group had university education, indicating that the GES  
38 may not be suitable as an instrument. General self-efficacy has been increased using PCC in a previous study in  
39 patients with acute coronary syndrome<sup>61</sup>, indicating that breast cancer patients could also benefit from PCC.  
40 This is of importance, as low self-efficacy has been identified as a predictor of terminating ET prematurely<sup>65</sup>  
41 due to beliefs about its low influence on health or low satisfaction with involvement in health care<sup>65</sup>. However,  
42 as the patients involved in the development of the support program requested help with understanding ET<sup>10</sup>, a  
43 future RCT could include a self-care questionnaire that could provide valuable information about patients' self-  
44 care capabilities. The participants in the previous study<sup>10</sup> could be assumed to have a high self-efficacy score, as  
45 they were well educated, but still required empowerment, which implies a more versatile and complex situation  
46 demanding new approaches and raising the question "Could patients have high scores in self-efficacy but still be  
47 vulnerable?" The high self-efficacy scores indicate that the patients in the intervention group might not have  
48 needed a support program, but they participated anyway for several sessions, which implies their need for  
49 support and knowledge. Situational vulnerability, caused by stressful circumstances such as cancer, has  
50 previously been identified. Even presumably empowered patients, such as physicians, were found to have  
51 difficulties remembering, understanding, and processing all information they received as patients<sup>66</sup>, which is  
52  
53  
54  
55  
56  
57  
58  
59  
60



1  
2  
3 highly interesting as it relates to this study's findings. Moreover, a modified version of a self-efficacy  
4 questionnaire to assess women's confidence regarding their ability to cope with symptoms<sup>67</sup> has been and will  
5 be used in a future RCT study<sup>68 69</sup>. Questions were added for the participants to rate their confidence in their  
6 ability to cope with eight symptoms (e.g., aches and pains, hot flashes, and sweating) on a 10-point scale ranging  
7 from 10 ("not confident") to 100 ("very confident")<sup>68</sup>. Furthermore, a modified empowerment scale<sup>70</sup> could be  
8 appropriate to use after adjustment to patients with ET.  
9  
10

11  
12  
13 Moreover, there was no difference in perceived symptoms, indicating either that the MSAS questionnaire was  
14 inadequate or that the knowledge itself did not decrease symptoms if patients did not use coping activities. The  
15 support program aims to educate and empower patients but does not evaluate whether they use their knowledge.  
16 It is also important to determine whether patients do use the coping strategies gained from the follow-up  
17 sessions, but the advice just does not work, in which case an adjustment in the provided education is needed.  
18 Additionally, it is important to identify whether coping demands could be overwhelming and decrease instead of  
19 increase quality of life, leading patients to not pursue coping strategies such as physical activities. This might be  
20 a topic to address before an RCT study, using interviews to evaluate participants' use of the gained knowledge.  
21  
22  
23

24  
25  
26 The study had some limitations. As the COVID-19 pandemic was ongoing, there were restrictions on the  
27 patients' ability to have face-to-face sessions with the trial leader. However, several patients stated that they  
28 would participate only if there were no mandatory sessions at the hospital. The patients also had the possibility  
29 of having their sessions using a digital conference system. As the intervention nurse navigator and the  
30 participants almost never met in person, their relationships could have been affected. However, a partnership was  
31 established between the patient and the trial leader using a PCC protocol. This might have decreased the effect of  
32 not meeting in person. In a future RCT, it will be crucial for patients to have face-to-face relationships with the  
33 intervention nurse navigator with whom they will build partnerships. This study did not identify when the  
34 intervention should stop, as it was decided before the intervention that it should last for 12 weeks. It might have  
35 been important for the patients in the intervention to have given this important information. However, seven of  
36 the 21 patients did not use the full 12-week intervention, which implies that a 12-week support program is  
37 suitable. No patient actively asked for longer follow up. All patients were allocated a nurse navigator whom they  
38 could contact after the intervention if further questions were answered.  
39  
40  
41  
42  
43

44  
45  
46 Furthermore, there was no measurement regarding the number of contacts the patients in the control group had  
47 with their nurse navigator; in a future RCT, this must be controlled to evaluate the economic effectiveness of the  
48 intervention. Moreover, using the QPP for the three-month measurement point was troublesome, as patients also  
49 had undergone radiation therapy during the same period, and patients also stated that their responses addressed  
50 the whole care chain and not only the care given related to ET. This could imply the difficulty of interpreting  
51 data from the QPP at the second measurement point. Furthermore, according to the instrument owner, 30  
52 patients in each group are required to interpret the data.  
53  
54  
55

56  
57 The MSAS was developed using 33 symptoms commonly associated with cancer<sup>49</sup>, and it has been validated in  
58 the Swedish population using patients diagnosed with breast cancer and treated with chemotherapy, radiotherapy  
59 and ET<sup>50</sup>. However, a more specific questionnaire could be appropriate, more accurate and easier for patients to  
60

1  
2  
3 complete, as the MSAS consists of three dimensions, and some of the participants did not provide responses for  
4 all three dimensions included in the questionnaire.  
5  
6  
7

## 8 9 **Conclusion**

10 This intervention seems to be feasible regarding its process and resources and acceptable among patients, as 95%  
11 completed the 12-week support program and 86% responded to the three-month questionnaire. A telephone  
12 follow-up intervention seems to be the preferable way to administer the intervention. However, for self-efficacy  
13 and symptoms, there were no differences in effect size between the control and intervention groups, indicating  
14 that the intervention was less feasible regarding scientific challenges.  
15  
16  
17

### 18 19 *Conflicts of interest*

20 The authors report no conflicts of interest.  
21  
22  
23

### 24 *Author Contributions*

25 IH, SAK, ROB, CW conceived the project and assisted with the protocol design. SAK managed the trial  
26 including recruitment and data collection. IH, SAK, CW coordinated the intervention program and interpreted  
27 the data and drafted the manuscript. ROB, SAK performed statistical analysis. All authors read, edited, and  
28 approved the final manuscript as submitted.  
29

### 30 *Ethical approval*

31 Patients were informed, in accordance with the Declaration of Helsinki <sup>71</sup>, that their participation was voluntary  
32 and could be terminated at any time without consequences. They were also assured that their confidentiality  
33 would be respected throughout the research process. This study was approved by the Swedish Ethical Review  
34 Authority (approval no 2020-03239).  
35  
36  
37

### 38 *Conflicts of Interest and Source of Funding*

39 Susanne Ahlstedt Karlsson has received honoraria from R&D Council in Gothenburg and Bohuslän  
40 (VGFOUGSB-932984). Ingela Henoch is currently receiving a grant from the Brostcacerforbundet. For the  
41 remaining authors none were declared. The authors have no conflicts of interest to disclose.  
42  
43  
44  
45

### 46 *Acknowledgments*

47 We thank all patients for sharing their personal experiences of life with ET. We would also like to thank the staff  
48 of the surgical outpatient care unit for contributing to finding eligible patients to include in the study.  
49

### 50 *Provenance and peer review*

51 Not commissioned; externally peer reviewed.  
52  
53

### 54 *Data availability statement*

55 Data are available upon reasonable request.  
56

### 57 *Open access*

58 This is an open access article distributed in accordance with the Creative Commons Attribution Non Commercial  
59 (CC BY-NC 4.0) license, which permits others to distribute, remix, adapt, build upon this work non-  
60 commercially, and license their derivative works on different terms, provided the original work is properly cited,

appropriate credit is given, any changes made indicated, and the use is non-commercial. See:  
<http://creativecommons.org/licenses/by-nc/4.0/>.

## References

1. Davies C, Godwin J, Gray R, et al. Relevance of breast cancer hormone receptors and other factors to the efficacy of adjuvant tamoxifen: patient-level meta-analysis of randomised trials. *Lancet* 2011;378(9793):771-84. doi: 10.1016/S0140-6736(11)60993-8
2. Berkowitz MJ, Thompson, C. K., Zibecchi. L.T., Lee, M.K., Streja, E., Berkowitz. J.S., Wenziger. C. M, Bake. J.L., Di Nome. M.L., Attai. D.J. How patients experience endocrine therapy for breast cancer: an online survey of side effects, adherence, and medical team support. *Journal of Cancer Survivorship* 2020;15:29–39. doi: 10.1007/s11764-020-00908-5.
3. Ahlstedt Karlsson, Wallengren C, Olofsson Bagge R, et al. Women's coping strategies during the first three months of adjuvant endocrine therapy for breast cancer. *Nurs Open* 2019;7(2):605 - 12. doi: 10.1002/nop2.430. [published Online First: 2020/02/25]
4. Moon, Hunter MS, Moss-Morris R, et al. Factors related to the experience of menopausal symptoms in women prescribed tamoxifen. *J Psychosom Obstet Gynaecol* 2017;38(3):226 - 35. doi: 10.1080/0167482X.2016.1216963. [published Online First: 2016/09/02]
5. Nabieva N, Fehm T, Haberle L, et al. Influence of side-effects on early therapy persistence with letrozole in post-menopausal patients with early breast cancer: Results of the prospective EvAluate-TM study. *Eur J Cancer* 2018;96:82 - 90. doi: 10.1016/j.ejca.2018.03.020. [published Online First: 2018/04/22]
6. Bluethmann SM, Murphy CC, Tiro JA, et al. Deconstructing decisions to initiate, maintain, or discontinue adjuvant endocrine therapy in breast cancer survivors: A mixed-methods study. *Oncol Nurs Forum* 2017;44(3):E101–E10. doi: 10.1188/17.ONF.E101-E110. [published Online First: 2017/06/22]
7. Cavazza M, Banks H, Ercolanoni M, et al. Factors influencing adherence to adjuvant endocrine therapy in breast cancer-treated women: using real-world data to inform a switch from acute to chronic disease management. *Breast Cancer Res Treat* 2020;183:189–99. doi: 10.1007/s10549-020-05748-6. [published Online First: 2020/06/28]

- 1
  - 2
  - 3
  - 4
  - 5
  - 6
  - 7
  8. Shinn EH, Broderick G, Fellman B, et al. Simulating time-dependent patterns of  
nonadherence by patients with breast cancer to adjuvant oral endocrine therapy. .  
*JCO Clin Cancer Inform* 2019;3:1 - 9. doi: 10.1200/CCI.18.00091. [published Online  
First: 2019/04/20]
  - 9
  - 10
  - 11
  - 12
  - 13
  - 14
  - 15
  - 16
  - 17
  - 18
  - 19
  - 20
  - 21
  - 22
  - 23
  - 24
  - 25
  - 26
  - 27
  - 28
  - 29
  - 30
  - 31
  - 32
  - 33
  - 34
  - 35
  - 36
  - 37
  - 38
  - 39
  - 40
  - 41
  - 42
  - 43
  - 44
  - 45
  - 46
  - 47
  - 48
  - 49
  - 50
  - 51
  - 52
  - 53
  - 54
  - 55
  - 56
  - 57
  - 58
  - 59
  - 60
9. Di Meglio A, Soldato D, Presti D, et al. Lifestyle and quality of life in patients with early-  
stage breast cancer receiving adjuvant endocrine therapy. *Curr Opin Oncol* 2021 doi:  
10.1097/CCO.0000000000000781 [published Online First: 2021/08/31]
  10. Ahlstedt Karlsson, Henoch I, Olofsson Bagge R, et al. An intervention mapping-based  
support program that empowers patients with endocrine therapy management,  
submitted.
  11. Moon, Moss-Morris R, Hunter MS, et al. Development of a self-management  
intervention to improve tamoxifen adherence in breast cancer survivors using an  
Intervention Mapping framework. *Support Care Cancer* 2020 doi: 10.1007/s00520-  
020-05850-x. [published Online First: 2020/10/30]
  12. Kim SH, Park S, Kim SJ, et al. Self-management Needs of Breast Cancer Survivors After  
Treatment: Results From a Focus Group Interview. *Cancer Nurs* 2020;43(1):78-85.  
doi: 10.1097/NCC.0000000000000641. [published Online First: 2018/08/28]
  13. Shelby RA, Dorfman CS, Bosworth HB, et al. Testing a behavioral intervention to improve  
adherence to adjuvant endocrine therapy (AET). *Contemp Clin Trials* 2019;76:120-31.  
doi: 10.1016/j.cct.2018.11.010 [published Online First: 2018/11/26]
  14. McLaughlin Renpenning KT, S, G. Self-Care Theory in Nursing. Selected Papers of Dorothea  
Orem. *New York Springer Publishing Company* 2003
  15. Richard AA, Shea K. Delineation of self-care and associated concepts. *J Nurs Scholarsh*  
2011;43(3):255-64. doi: 10.1111/j.1547-5069.2011.01404.x [published Online First:  
2011/09/03]
  16. Denyes MJ, Orem DE, Bekel G, et al. Self-care: a foundational science. *Nurs Sci Q*  
2001;14(1):48-54. doi: 10.1177/089431840101400113 [published Online First:  
2002/03/05]
  17. Ekman I, Swedberg K, Taft C, et al. Person-centered care--ready for prime time. *Eur J*  
*Cardiovasc Nurs* 2011;10(4):248-51. doi: 10.1016/j.ejcnurse.2011.06.008. [published  
Online First: 2011/07/19]
  18. Bag E, Mollaoglu M. The evaluation of self-care and self-efficacy in patients undergoing  
hemodialysis. *J Eval Clin Pract* 2010;16(3):605-10. doi: 10.1111/j.1365-  
2753.2009.01214.x [published Online First: 2009/10/31]
  19. Toivonen KI, Williamson TM, Carlson LE, et al. Potentially Modifiable Factors Associated  
with Adherence to Adjuvant Endocrine Therapy among Breast Cancer Survivors: A  
Systematic Review. *Cancers (Basel)* 2020;13(1) doi: 10.3390/cancers13010107  
[published Online First: 2021/02/10]
  20. Moon, Moss-Morris R, Hunter MS, et al. Barriers and facilitators of adjuvant hormone  
therapy adherence and persistence in women with breast cancer: a systematic  
review. *Patient Prefer Adherence* 2017;11:305-22. doi: 10.2147/PPA.S126651  
[published Online First: 2017/03/07]
  21. Bandura A. Self-efficacy. The exercise of control. *WH Freeman New York* 1997
  22. Fors A, Taft C, Ulin K, et al. Person-centred care improves self-efficacy to control  
symptoms after acute coronary syndrome: a randomized controlled trial. *Eur J*  
*Cardiovasc Nurs* 2016;15(2):186-94. doi: 10.1177/1474515115623437 [published  
Online First: 2015/12/25]

- 1
  - 2
  - 3
  - 4
  - 5
  - 6
  - 7
  - 8
  - 9
  - 10
  - 11
  - 12
  - 13
  - 14
  - 15
  - 16
  - 17
  - 18
  - 19
  - 20
  - 21
  - 22
  - 23
  - 24
  - 25
  - 26
  - 27
  - 28
  - 29
  - 30
  - 31
  - 32
  - 33
  - 34
  - 35
  - 36
  - 37
  - 38
  - 39
  - 40
  - 41
  - 42
  - 43
  - 44
  - 45
  - 46
  - 47
  - 48
  - 49
  - 50
  - 51
  - 52
  - 53
  - 54
  - 55
  - 56
  - 57
  - 58
  - 59
  - 60
23. Ali L, Wallstrom S, Ekman I, et al. Effects of person-centered care via telephone on self-efficacy in patients with chronic obstructive pulmonary disease: a subgroup analysis of a randomized controlled trial. *Nursing Open* 2020 doi: 10.1002/nop2.701
24. Wolf A, Fors A, Ulin K, et al. An eHealth Diary and Symptom-Tracking Tool Combined With Person-Centered Care for Improving Self-Efficacy After a Diagnosis of Acute Coronary Syndrome: A Substudy of a Randomized Controlled Trial. *J Med Internet Res* 2016;18(2):e40. doi: 10.2196/jmir.4890 [published Online First: 2016/02/26]
25. Wittenberg E, Goldsmith J, Parnell TA. Development of a communication and health literacy curriculum: Optimizing the informal cancer caregiver role. *Psychooncology* 2020;29(4):766-74. doi: 10.1002/pon.5341 [published Online First: 2020/01/31]
26. Bernier MJ. Developing and evaluating printed education materials: a prescriptive model for quality. *Orthop Nurs* 1993;12(6):39-46. doi: 10.1097/00006416-199311000-00008 [published Online First: 1993/11/01]
27. Hoffmann, Worrall L. Designing effective written health education materials: considerations for health professionals. *Disabil Rehabil* 2004;26(19):1166 - 73. doi: 10.1080/09638280410001724816. [published Online First: 2004/09/17]
28. Hoffmann, Glasziou PP, Boutron I, et al. Better reporting of interventions: template for intervention description and replication (TIDieR) checklist and guide. *BMJ* 2014;348:g1687. doi: 10.1136/bmj.g1687 [published Online First: 2014/03/13]
29. Eldridge SM, Chan CL, Campbell MJ, et al. CONSORT 2010 statement: extension to randomised pilot and feasibility trials. *Pilot Feasibility Stud* 2016;2:64. doi: 10.1186/s40814-016-0105-8 [published Online First: 2016/12/15]
30. Moon, Moss-Morris., Hunter, et al. Acceptability and feasibility of a self-management intervention for women prescribed tamoxifen. *Health Education Journal* 2019;78(8) 901 - 15. doi: 10.1177/0017896919853856
31. Sedgwick P. Before and after study designs. *BMJ* 2014;349:g5074. doi: 10.1136/bmj.g5074 [published Online First: 2014/08/12]
32. Julious SA. Sample size of 12 per group rule of thumb for a pilot study. *Pharmaceut Statist* 2005(4): 287–91. doi: 10.1002/pst.185
33. Patient Act. SFS 2014:821(2014:82) Assessed 21-05-18.
34. <http://www.1177.se>. Sjukdomar & besvär/Cancer/ Råd och stöd vid cancerKontaktsjuksköterskan – ditt stöd i vården vid cancer (21-07-21).
35. Granger BB, Britten N, Swedberg K, et al. Dumping adherence: a person-centred response for primary care. *Fam Pract* 2020;37(6):862 - 64. doi: 10.1093/fampra/cmaa060. [published Online First: 2020/06/27]
36. Higgins A, Nicholl H. The experiences of lecturers and students in the use of microteaching as a teaching strategy. *Nurse Educ Pract* 2003;3(4):220-7. doi: 10.1016/S1471-5953(02)00106-3 [published Online First: 2008/11/29]
37. Remesh A. Microteaching, an efficient technique for learning effective teaching. *J Res Med Sci* 2013;18(2):158-63. [published Online First: 2013/08/06]
38. Dewey J. *Democracy and Education*. 2016
39. Ekman I. *Personcentrering inom hälso- och sjukvård. Från filosofi till praktik*. Liber AB 2014
40. O’Neill GM, T. . STUDENT-CENTRED LEARNING: WHAT DOES IT MEAN FOR STUDENTS AND LECTURERS? . In: *Emerging Issues in the Practice of University Learning and Teaching* 2005



- 1  
2  
3 41. Thabane L, Lancaster G. A guide to the reporting of protocols of pilot and feasibility trials.  
4 *Pilot Feasibility Stud* 2019;5:37. doi: 10.1186/s40814-019-0423-8 [published Online  
5 First: 20190228]  
6
- 7 42. Lancaster GA, Dodd S, Williamson PR. Design and analysis of pilot studies:  
8 recommendations for good practice. *J Eval Clin Pract* 2004;10(2):307-12. doi:  
9 10.1111/j..2002.384.doc.x [published Online First: 2004/06/11]  
10
- 11 43. Love J, Moore CD, Hensing G. Validation of the Swedish translation of the General Self-  
12 Efficacy scale. *Qual Life Res* 2012;21(7):1249-53. doi: 10.1007/s11136-011-0030-5  
13 [published Online First: 2011/10/11]  
14
- 15 44. Thieme M, Einenkel J, Zenger M, et al. Optimism, pessimism and self-efficacy in female  
16 cancer patients. *Jpn J Clin Oncol* 2017;47(9):849-55. doi: 10.1093/jjco/hyx079  
17 [published Online First: 2017/06/08]  
18
- 19 45. Wilde B, Starrin B, Larsson G, et al. Quality of care from a patient perspective--a  
20 grounded theory study. *Scand J Caring Sci* 1993;7(2):113-20. doi: 10.1111/j.1471-  
21 6712.1993.tb00180.x [published Online First: 1993/01/01]  
22
- 23 46. Wilde-Larsson B, Larsson G. Patients' views on quality of care and attitudes towards re-  
24 visiting providers. *Int J Health Care Qual Assur* 2009;22(6):600-11. doi:  
25 10.1108/09526860910986867 [published Online First: 2009/12/05]  
26
- 27 47. Wallström SE, I; Taft,C. Svenskarnas syn på personcentrering i vården. *SOM-institutets*  
28 *sjuttonde forskarantologi (red Andersson, Ohlsson, Oscarsson och Oskarsson)* 2017  
29
- 30 48. Wilde-Larsson B, Larsson G. Reviderat åtgärdsindex. Pm 2016:1. *Improveit Digital*  
31 *Solutions AB, Halmstad, Sweden* 2016  
32
- 33 49. Portenoy RK, Thaler HT, Kornblith AB, et al. The Memorial Symptom Assessment Scale:  
34 an instrument for the evaluation of symptom prevalence, characteristics and distress.  
35 *Eur J Cancer* 1994;30A(9):1326-36. doi: 10.1016/0959-8049(94)90182-1 [published  
36 Online First: 1994/01/01]  
37
- 38 50. Browall M, Kenne Sarenmalm E, Nasic S, et al. Validity and reliability of the Swedish  
39 version of the Memorial Symptom Assessment Scale (MSAS): an instrument for the  
40 evaluation of symptom prevalence, characteristics, and distress. *J Pain Symptom*  
41 *Manage* 2013;46(1):131-41. doi: 10.1016/j.jpainsymman.2012.07.023  
42 S0885-3924(12)00502-7 [pii] [published Online First: 2012/12/01]  
43
- 44 51. Eldridge SM, Lancaster GA, Campbell MJ, et al. Defining Feasibility and Pilot Studies in  
45 Preparation for Randomised Controlled Trials: Development of a Conceptual  
46 Framework. *PLoS One* 2016;11(3):e0150205. doi: 10.1371/journal.pone.0150205  
47 [published Online First: 2016/03/16]  
48
- 49 52. Eldridge SM, Ashby D, Feder GS, et al. Lessons for cluster randomized trials in the  
50 twenty-first century: a systematic review of trials in primary care. *Clin Trials*  
51 2004;1(1):80-90. doi: 10.1191/1740774504cn006rr [published Online First:  
52 2005/11/12]  
53
- 54 53. Heiney SP, Parker PD, Felder TM, et al. A systematic review of interventions to improve  
55 adherence to endocrine therapy. *Breast Cancer Res Treat* 2019;173(3):499-510. doi:  
56 10.1007/s10549-018-5012-7 [published Online First: 2018/11/06]  
57
- 58 54. Rowlands G, Sims J, Kerry S. A lesson learnt: the importance of modelling in randomized  
59 controlled trials for complex interventions in primary care. *Fam Pract*  
60 2005;22(1):132-9. doi: 10.1093/fampra/cmh704 [published Online First: 2005/01/11]

- 1  
2  
3 55. Plsek PE, Greenhalgh T. Complexity science: The challenge of complexity in health care.  
4 *BMJ* 2001;323(7313):625-8. doi: 10.1136/bmj.323.7313.625 [published Online First:  
5 2001/09/15]  
6  
7 56. Gunasekeran DV, Tham YC, Ting DSW, et al. Digital health during COVID-19: lessons from  
8 operationalising new models of care in ophthalmology. *Lancet Digit Health*  
9 2021;3(2):e124-e34. doi: 10.1016/S2589-7500(20)30287-9 [published Online First:  
10 2021/01/30]  
11  
12 57. Budd J, Miller BS, Manning EM, et al. Digital technologies in the public-health response  
13 to COVID-19. *Nat Med* 2020;26(8):1183-92. doi: 10.1038/s41591-020-1011-4  
14 [published Online First: 2020/08/10]  
15  
16 58. Vargo D, Lin, Z., Benwell, B., Zheng, Y. Digital technology use during COVID-19 pandemic:  
17 A rapid review. *Human Behavior and Emerging Technologies* 2021;3(1):13-24. doi:  
18 10.1002/hbe2.242  
19  
20 59. Ali L, Wallstrom S, Ekman I, et al. Effects of person-centred care via telephone on self-  
21 efficacy in patients with chronic obstructive pulmonary disease: Subgroup analysis of  
22 a randomized controlled trial. *Nurs Open* 2021;8(2):927-35. doi: 10.1002/nop2.701  
23 [published Online First: 2021/02/12]  
24  
25 60. Bostrom E, Ali L, Fors A, et al. Registered nurses' experiences of communication with  
26 patients when practising person-centred care over the phone: a qualitative interview  
27 study. *BMC Nurs* 2020;19:54. doi: 10.1186/s12912-020-00448-4 [published Online  
28 First: 2020/06/25]  
29  
30 61. Fors A, Ekman I, Taft C, et al. Person-centred care after acute coronary syndrome, from  
31 hospital to primary care - A randomised controlled trial. *Int J Cardiol* 2015;187:693-9.  
32 doi: 10.1016/j.ijcard.2015.03.336 [published Online First: 2015/04/29]  
33  
34 62. Fontein DB, Nortier JW, Liefers GJ, et al. High non-compliance in the use of letrozole after  
35 2.5 years of extended adjuvant endocrine therapy. Results from the IDEAL  
36 randomized trial. *Eur J Surg Oncol* 2012;38(2):110-7. doi: 10.1016/j.ejso.2011.11.010  
37 [published Online First: 2011/12/17]  
38  
39 63. Foster C, Breckons M, Cotterell P, et al. Cancer survivors' self-efficacy to self-manage in  
40 the year following primary treatment. *J Cancer Surviv* 2015;9(1):11-9. doi:  
41 10.1007/s11764-014-0384-0 [published Online First: 2014/07/17]  
42  
43 64. Sherer M, Maddux, J. E., Mercandante, B., Prentice-Dunn, S., Jacobs, B., & Rogers, R. W. .  
44 The self-efficacy scale: Construction and validation. . *Psychological reports*  
45 1982;51(2):663-71.  
46  
47 65. Lambert LK, Balneaves LG, Howard AF, et al. Understanding adjuvant endocrine therapy  
48 persistence in breast Cancer survivors. *BMC Cancer* 2018;18(1):732. doi:  
49 10.1186/s12885-018-4644-7 [published Online First: 2018/07/13]  
50  
51 66. Alders IMR, Van Dulmen S, Smits CHM, et al. Patient coaching in secondary care:  
52 healthcare professionals' views on target group, intervention and coach profile. *Int J*  
53 *Qual Health Care* 2021;33(3) doi: 10.1093/intqhc/mzab094 [published Online First:  
54 2021/07/02]  
55  
56 67. Lorig K, Chastain RL, Ung E, et al. Development and evaluation of a scale to measure  
57 perceived self-efficacy in people with arthritis. *Arthritis Rheum* 1989;32(1):37-44. doi:  
58 10.1002/anr.1780320107 [published Online First: 1989/01/01]  
59  
60 68. Shelby RA, Edmond SN, Wren AA, et al. Self-efficacy for coping with symptoms  
moderates the relationship between physical symptoms and well-being in breast  
cancer survivors taking adjuvant endocrine therapy. *Support Care Cancer*

1  
2  
3 2014;22(10):2851-9. doi: 10.1007/s00520-014-2269-1 [published Online First:  
4 2014/05/14]

5  
6 69. Shelby RA, Dorfman CS, Arthur SS, et al. Improving health engagement and lifestyle  
7 management for breast cancer survivors with diabetes. *Contemp Clin Trials*  
8 2020;92:105998. doi: 10.1016/j.cct.2020.105998 [published Online First:  
9 2020/04/15]

10  
11 70. Acuna Mora M, Luyckx K, Sparud-Lundin C, et al. Patient empowerment in young persons  
12 with chronic conditions: Psychometric properties of the Gothenburg Young Persons  
13 Empowerment Scale (GYPES). *PLoS One* 2018;13(7):e0201007. doi:  
14 10.1371/journal.pone.0201007 [published Online First: 2018/07/22]

15  
16 71. World Medical Association. World Medical Association Declaration of Helsinki. Ethical  
17 principles for medical research involving human subjects. *Nurse Ethics* 2013;9(1):105  
18 - 09.

19  
20  
21  
22 Figure 1. Retention - CONSORT Flow diagram for the usual care group. Patients included September 2020 –  
23 December 2021.

24  
25  
26 Figure 2. Retention - CONSORT flow diagram for the person-centered support program group. Patients included  
27 December 2020 – March 2021.

28  
29  
30 Figure 3. The care and measurement chain for the control and intervention groups. Both groups received the  
31 content in the blue area (usual care).

32 Abbreviations: Endocrine therapy – ET, Individual learning plan – ILP.

33  
34  
35 Figure 4. Secondary outcomes boxplot. Baseline and 3-month difference measures in the control and  
36 intervention groups for self-efficacy and reported symptoms.

37 Abbreviation: Number – no, Self-efficacy – SE.  
38  
39  
40  
41  
42  
43  
44  
45  
46  
47  
48  
49  
50  
51  
52  
53  
54  
55  
56  
57  
58  
59  
60



1  
2  
3  
4  
5  
6  
7  
8  
9  
10  
11  
12  
13  
14  
15  
16  
17  
18  
19  
20  
21  
22  
23  
24  
25  
26  
27  
28  
29  
30  
31  
32  
33  
34  
35  
36  
37  
38  
39  
40  
41  
42  
43  
44  
45  
46  
47  
48  
49  
50  
51  
52  
53  
54  
55  
56  
57  
58  
59  
60

For peer review only

## Unable to Convert Image

The dimensions of this image (in pixels) are too large to be converted. For this image to convert, the total number of pixels (height x width) must be less than 40,000,000 (40 megapixels).

Figure 1. Retention - CONSORT Flow diagram for the usual care group. Patients included September 2020 – December 2021.

## Unable to Convert Image

The dimensions of this image (in pixels) are too large to be converted. For this image to convert, the total number of pixels (height x width) must be less than 40,000,000 (40 megapixels).

Figure 2. Retention - CONSORT flow diagram for the person-centered support program group. Patients included December 2020 – March 2021.

## Unable to Convert Image

The dimensions of this image (in pixels) are too large to be converted. For this image to convert, the total number of pixels (height x width) must be less than 40,000,000 (40 megapixels).

Figure 3. The care and measurement chain for the control and intervention groups. Both groups received the content in the blue area (usual care).

Abbreviations: Endocrine therapy – ET, Individual learning plan – ILP.

1  
2  
3  
4  
5  
6  
7  
8  
9  
10  
11  
12  
13  
14  
15  
16  
17  
18  
19  
20  
21  
22  
23  
24  
25  
26  
27  
28  
29  
30  
31  
32  
33  
34  
35  
36  
37  
38  
39  
40  
41  
42  
43  
44  
45  
46  
47  
48  
49  
50  
51  
52  
53  
54  
55  
56  
57  
58  
59  
60

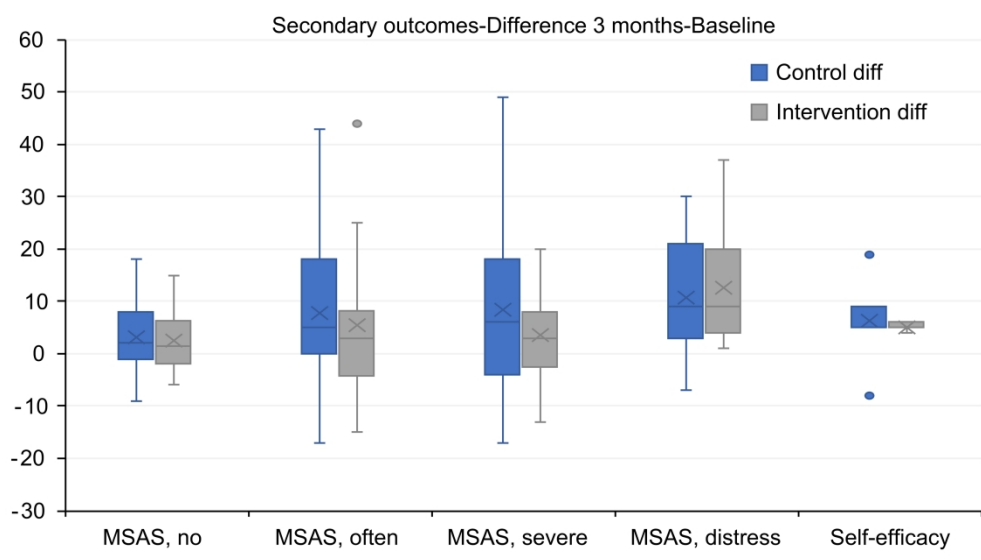

Figure 4. Secondary outcomes boxplot. Baseline and 3-month difference measures in the control and intervention groups for self-efficacy and reported symptoms. Abbreviation: Number – no, Self-efficacy – SE.

159x90mm (600 x 600 DPI)

# Reporting checklist for quality improvement in health care.

Based on the SQUIRE guidelines.

## Instructions to authors

Complete this checklist by entering the page numbers from your manuscript where readers will find each of the items listed below.

Your article may not currently address all the items on the checklist. Please modify your text to include the missing information. If you are certain that an item does not apply, please write "n/a" and provide a short explanation.

Upload your completed checklist as an extra file when you submit to a journal.

In your methods section, say that you used the SQUIRE reporting guidelines, and cite them as:

Ogrinc G, Davies L, Goodman D, Batalden P, Davidoff F, Stevens D. SQUIRE 2.0 (Standards for Quality Improvement Reporting Excellence): revised publication guidelines from a detailed consensus process

|                     | Reporting Item                                                                                                                                                                                                                                      | Page Number |
|---------------------|-----------------------------------------------------------------------------------------------------------------------------------------------------------------------------------------------------------------------------------------------------|-------------|
| <b>Title</b>        |                                                                                                                                                                                                                                                     |             |
|                     | <a href="#">#1</a> Indicate that the manuscript concerns an initiative to improve healthcare (broadly defined to include the quality, safety, effectiveness, patientcenteredness, timeliness, cost, efficiency, and equity of healthcare)           | 1           |
| <b>Abstract</b>     |                                                                                                                                                                                                                                                     |             |
|                     | <a href="#">#02a</a> Provide adequate information to aid in searching and indexing                                                                                                                                                                  | 2           |
|                     | <a href="#">#02b</a> Summarize all key information from various sections of the text using the abstract format of the intended publication or a structured summary such as: background, local problem, methods, interventions, results, conclusions | 3           |
| <b>Introduction</b> |                                                                                                                                                                                                                                                     |             |

|    |                 |                      |                                                                           |   |
|----|-----------------|----------------------|---------------------------------------------------------------------------|---|
| 1  | Problem         | <a href="#">#3</a>   | Nature and significance of the local problem                              | 4 |
| 2  | description     |                      |                                                                           |   |
| 3  |                 |                      |                                                                           |   |
| 4  | Available       | <a href="#">#4</a>   | Summary of what is currently known about the problem, including           | 4 |
| 5  | knowledge       |                      | relevant previous studies                                                 |   |
| 6  |                 |                      |                                                                           |   |
| 7  |                 |                      |                                                                           |   |
| 8  | Rationale       | <a href="#">#5</a>   | Informal or formal frameworks, models, concepts, and / or theories        | 5 |
| 9  |                 |                      | used to explain the problem, any reasons or assumptions that were         |   |
| 10 |                 |                      | used to develop the intervention(s), and reasons why the                  |   |
| 11 |                 |                      | intervention(s) was expected to work                                      |   |
| 12 |                 |                      |                                                                           |   |
| 13 |                 |                      |                                                                           |   |
| 14 |                 |                      |                                                                           |   |
| 15 | Specific aims   | <a href="#">#6</a>   | Purpose of the project and of this report                                 | 5 |
| 16 |                 |                      |                                                                           |   |
| 17 |                 |                      |                                                                           |   |
| 18 | <b>Methods</b>  |                      |                                                                           |   |
| 19 |                 |                      |                                                                           |   |
| 20 | Context         | <a href="#">#7</a>   | Contextual elements considered important at the outset of introducing     | 5 |
| 21 |                 |                      | the intervention(s)                                                       |   |
| 22 |                 |                      |                                                                           |   |
| 23 |                 |                      |                                                                           |   |
| 24 | Intervention(s) | <a href="#">#08a</a> | Description of the intervention(s) in sufficient detail that others could | 6 |
| 25 |                 |                      | reproduce it                                                              |   |
| 26 |                 |                      |                                                                           |   |
| 27 |                 |                      |                                                                           |   |
| 28 | Intervention(s) | <a href="#">#08b</a> | Specifics of the team involved in the work                                | 6 |
| 29 |                 |                      |                                                                           |   |
| 30 | Study of the    | <a href="#">#09a</a> | Approach chosen for assessing the impact of the intervention(s)           | 8 |
| 31 | Intervention(s) |                      |                                                                           |   |
| 32 |                 |                      |                                                                           |   |
| 33 |                 |                      |                                                                           |   |
| 34 | Study of the    | <a href="#">#09b</a> | Approach used to establish whether the observed outcomes were due         | 8 |
| 35 | Intervention(s) |                      | to the intervention(s)                                                    |   |
| 36 |                 |                      |                                                                           |   |
| 37 |                 |                      |                                                                           |   |
| 38 | Measures        | <a href="#">#10a</a> | Measures chosen for studying processes and outcomes of the                | 8 |
| 39 |                 |                      | intervention(s), including rationale for choosing them, their             |   |
| 40 |                 |                      | operational definitions, and their validity and reliability               |   |
| 41 |                 |                      |                                                                           |   |
| 42 |                 |                      |                                                                           |   |
| 43 | Measures        | <a href="#">#10b</a> | Description of the approach to the ongoing assessment of contextual       | 8 |
| 44 |                 |                      | elements that contributed to the success, failure, efficiency, and cost   |   |
| 45 |                 |                      |                                                                           |   |
| 46 |                 |                      |                                                                           |   |
| 47 | Measures        | <a href="#">#10c</a> | Methods employed for assessing completeness and accuracy of data          | 8 |
| 48 |                 |                      |                                                                           |   |
| 49 | Analysis        | <a href="#">#11a</a> | Qualitative and quantitative methods used to draw inferences from the     | 9 |
| 50 |                 |                      | data                                                                      |   |
| 51 |                 |                      |                                                                           |   |
| 52 |                 |                      |                                                                           |   |
| 53 | Analysis        | <a href="#">#11b</a> | Methods for understanding variation within the data, including the        | 9 |
| 54 |                 |                      | effects of time as a variable                                             |   |
| 55 |                 |                      |                                                                           |   |
| 56 |                 |                      |                                                                           |   |
| 57 |                 |                      |                                                                           |   |
| 58 |                 |                      |                                                                           |   |
| 59 |                 |                      |                                                                           |   |
| 60 |                 |                      |                                                                           |   |

|    |                   |                      |                                                                           |         |
|----|-------------------|----------------------|---------------------------------------------------------------------------|---------|
| 1  | Ethical           | <a href="#">#12</a>  | Ethical aspects of implementing and studying the intervention(s) and      | 15      |
| 2  | considerations    |                      | how they were addressed, including, but not limited to, formal ethics     |         |
| 3  |                   |                      | review and potential conflict(s) of interest                              |         |
| 4  |                   |                      |                                                                           |         |
| 5  |                   |                      |                                                                           |         |
| 6  | <b>Results</b>    |                      |                                                                           |         |
| 7  |                   |                      |                                                                           |         |
| 8  |                   |                      |                                                                           |         |
| 9  |                   | <a href="#">#13a</a> | Initial steps of the intervention(s) and their evolution over time (e.g., | 1-3     |
| 10 |                   |                      | time-line diagram, flow chart, or table), including modifications made    |         |
| 11 |                   |                      | to the intervention during the project                                    |         |
| 12 |                   |                      |                                                                           |         |
| 13 |                   |                      |                                                                           |         |
| 14 |                   | <a href="#">#13b</a> | Details of the process measures and outcome                               | 10-11   |
| 15 |                   |                      |                                                                           |         |
| 16 |                   | <a href="#">#13c</a> | Contextual elements that interacted with the intervention(s)              | 10-11   |
| 17 |                   |                      |                                                                           |         |
| 18 |                   | <a href="#">#13d</a> | Observed associations between outcomes, interventions, and relevant       | 10-11   |
| 19 |                   |                      | contextual elements                                                       |         |
| 20 |                   |                      |                                                                           |         |
| 21 |                   |                      |                                                                           |         |
| 22 |                   | <a href="#">#13e</a> | Unintended consequences such as unexpected benefits, problems,            | 10-11   |
| 23 |                   |                      | failures, or costs associated with the intervention(s).                   |         |
| 24 |                   |                      |                                                                           |         |
| 25 |                   |                      |                                                                           |         |
| 26 |                   | <a href="#">#13f</a> | Details about missing data                                                | 10-11 + |
| 27 |                   |                      |                                                                           | tables  |
| 28 |                   |                      |                                                                           |         |
| 29 |                   |                      |                                                                           |         |
| 30 | <b>Discussion</b> |                      |                                                                           |         |
| 31 |                   |                      |                                                                           |         |
| 32 | Summary           | <a href="#">#14a</a> | Key findings, including relevance to the rationale and specific aims      | 12      |
| 33 |                   |                      |                                                                           |         |
| 34 | Summary           | <a href="#">#14b</a> | Particular strengths of the project                                       | 12      |
| 35 |                   |                      |                                                                           |         |
| 36 |                   |                      |                                                                           |         |
| 37 | Interpretation    | <a href="#">#15a</a> | Nature of the association between the intervention(s) and the             | 12-13   |
| 38 |                   |                      | outcomes                                                                  |         |
| 39 |                   |                      |                                                                           |         |
| 40 |                   |                      |                                                                           |         |
| 41 | Interpretation    | <a href="#">#15b</a> | Comparison of results with findings from other publications               | 12-13   |
| 42 |                   |                      |                                                                           |         |
| 43 | Interpretation    | <a href="#">#15c</a> | Impact of the project on people and systems                               | 13      |
| 44 |                   |                      |                                                                           |         |
| 45 | Interpretation    | <a href="#">#15d</a> | Reasons for any differences between observed and anticipated              | 13      |
| 46 |                   |                      | outcomes, including the influence of context                              |         |
| 47 |                   |                      |                                                                           |         |
| 48 |                   |                      |                                                                           |         |
| 49 | Interpretation    | <a href="#">#15e</a> | Costs and strategic trade-offs, including opportunity costs               | NA      |
| 50 |                   |                      |                                                                           |         |
| 51 | Limitations       | <a href="#">#16a</a> | Limits to the generalizability of the work                                | 13      |
| 52 |                   |                      |                                                                           |         |
| 53 | Limitations       | <a href="#">#16b</a> | Factors that might have limited internal validity such as confounding,    | 14      |
| 54 |                   |                      | bias, or imprecision in the design, methods, measurement, or analysis     |         |
| 55 |                   |                      |                                                                           |         |
| 56 |                   |                      |                                                                           |         |
| 57 | Limitations       | <a href="#">#16c</a> | Efforts made to minimize and adjust for limitations                       | 14      |
| 58 |                   |                      |                                                                           |         |
| 59 |                   |                      |                                                                           |         |
| 60 |                   |                      |                                                                           |         |



|    |            |                      |                                                              |    |
|----|------------|----------------------|--------------------------------------------------------------|----|
| 1  | Conclusion | <a href="#">#17a</a> | Usefulness of the work                                       | 14 |
| 2  |            |                      |                                                              |    |
| 3  | Conclusion | <a href="#">#17b</a> | Sustainability                                               | 14 |
| 4  |            |                      |                                                              |    |
| 5  | Conclusion | <a href="#">#17c</a> | Potential for spread to other contexts                       | 14 |
| 6  |            |                      |                                                              |    |
| 7  | Conclusion | <a href="#">#17d</a> | Implications for practice and for further study in the field | 14 |
| 8  |            |                      |                                                              |    |
| 9  | Conclusion | <a href="#">#17e</a> | Suggested next steps                                         | 14 |
| 10 |            |                      |                                                              |    |
| 11 |            |                      |                                                              |    |

## Other information

|    |         |                     |                                                                                                                                                     |    |
|----|---------|---------------------|-----------------------------------------------------------------------------------------------------------------------------------------------------|----|
| 12 |         |                     |                                                                                                                                                     |    |
| 13 |         |                     |                                                                                                                                                     |    |
| 14 |         |                     |                                                                                                                                                     |    |
| 15 |         |                     |                                                                                                                                                     |    |
| 16 | Funding | <a href="#">#18</a> | Sources of funding that supported this work. Role, if any, of the funding organization in the design, implementation, interpretation, and reporting | 15 |
| 17 |         |                     |                                                                                                                                                     |    |
| 18 |         |                     |                                                                                                                                                     |    |
| 19 |         |                     |                                                                                                                                                     |    |
| 20 |         |                     |                                                                                                                                                     |    |
| 21 |         |                     |                                                                                                                                                     |    |

## Notes:

- 13f: 10-11 + tables The SQUIRE 2.0 checklist is distributed under the terms of the Creative Commons Attribution License CC BY-NC 4.0. This checklist was completed on 07. January 2022 using <https://www.goodreports.org/>, a tool made by the [EQUATOR Network](#) in collaboration with [Penelope.ai](#)

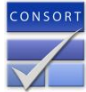

## CONSORT 2010 checklist of information to include when reporting a pilot or feasibility trial\*

| Section/Topic                    | Item No | Checklist item                                                                                                                                                                              | Reported on page No |
|----------------------------------|---------|---------------------------------------------------------------------------------------------------------------------------------------------------------------------------------------------|---------------------|
| <b>Title and abstract</b>        |         |                                                                                                                                                                                             |                     |
|                                  | 1a      | Identification as a pilot or feasibility randomised trial in the title                                                                                                                      | 1                   |
|                                  | 1b      | Structured summary of pilot trial design, methods, results, and conclusions (for specific guidance see CONSORT abstract extension for pilot trials)                                         | 1                   |
| <b>Introduction</b>              |         |                                                                                                                                                                                             |                     |
| Background and objectives        | 2a      | Scientific background and explanation of rationale for future definitive trial, and reasons for randomised pilot trial                                                                      | 4                   |
|                                  | 2b      | Specific objectives or research questions for pilot trial                                                                                                                                   | 5                   |
| <b>Methods</b>                   |         |                                                                                                                                                                                             |                     |
| Trial design                     | 3a      | Description of pilot trial design (such as parallel, factorial) including allocation ratio                                                                                                  | 5                   |
|                                  | 3b      | Important changes to methods after pilot trial commencement (such as eligibility criteria), with reasons                                                                                    | NA                  |
| Participants                     | 4a      | Eligibility criteria for participants                                                                                                                                                       | 6                   |
|                                  | 4b      | Settings and locations where the data were collected                                                                                                                                        | 6                   |
|                                  | 4c      | How participants were identified and consented                                                                                                                                              | 6                   |
| Interventions                    | 5       | The interventions for each group with sufficient details to allow replication, including how and when they were actually administered                                                       | 6-7                 |
| Outcomes                         | 6a      | Completely defined prespecified assessments or measurements to address each pilot trial objective specified in 2b, including how and when they were assessed                                | 8                   |
|                                  | 6b      | Any changes to pilot trial assessments or measurements after the pilot trial commenced, with reasons                                                                                        | NA                  |
|                                  | 6c      | If applicable, prespecified criteria used to judge whether, or how, to proceed with future definitive trial                                                                                 | NA                  |
| Sample size                      | 7a      | Rationale for numbers in the pilot trial                                                                                                                                                    | 7                   |
|                                  | 7b      | When applicable, explanation of any interim analyses and stopping guidelines                                                                                                                | NA                  |
| Randomisation:                   |         |                                                                                                                                                                                             |                     |
| Sequence generation              | 8a      | Method used to generate the random allocation sequence                                                                                                                                      | NA                  |
|                                  | 8b      | Type of randomisation(s); details of any restriction (such as blocking and block size)                                                                                                      | NA                  |
| Allocation concealment mechanism | 9       | Mechanism used to implement the random allocation sequence (such as sequentially numbered containers), describing any steps taken to conceal the sequence until interventions were assigned | NA                  |

|                                                      |     |                                                                                                                                                                                       |                |
|------------------------------------------------------|-----|---------------------------------------------------------------------------------------------------------------------------------------------------------------------------------------|----------------|
| Implementation                                       | 10  | Who generated the random allocation sequence, who enrolled participants, and who assigned participants to interventions                                                               | NA             |
| Blinding                                             | 11a | If done, who was blinded after assignment to interventions (for example, participants, care providers, those assessing outcomes) and how                                              | NA             |
|                                                      | 11b | If relevant, description of the similarity of interventions                                                                                                                           | NA             |
| Statistical methods                                  | 12  | Methods used to address each pilot trial objective whether qualitative or quantitative                                                                                                | 9              |
| <b>Results</b>                                       |     |                                                                                                                                                                                       |                |
| Participant flow (a diagram is strongly recommended) | 13a | For each group, the numbers of participants who were approached and/or assessed for eligibility, randomly assigned, received intended treatment, and were assessed for each objective | 10             |
|                                                      | 13b | For each group, losses and exclusions after randomisation, together with reasons                                                                                                      | 10             |
| Recruitment                                          | 14a | Dates defining the periods of recruitment and follow-up                                                                                                                               | 10             |
|                                                      | 14b | Why the pilot trial ended or was stopped                                                                                                                                              | NA             |
| Baseline data                                        | 15  | A table showing baseline demographic and clinical characteristics for each group                                                                                                      | Table 1        |
| Numbers analysed                                     | 16  | For each objective, number of participants (denominator) included in each analysis. If relevant, these numbers should be by randomised group                                          | Figure 1 and 2 |
| Outcomes and estimation                              | 17  | For each objective, results including expressions of uncertainty (such as 95% confidence interval) for any estimates. If relevant, these results should be by randomised group        | NA             |
| Ancillary analyses                                   | 18  | Results of any other analyses performed that could be used to inform the future definitive trial                                                                                      | NA             |
| Harms                                                | 19  | All important harms or unintended effects in each group (for specific guidance see CONSORT for harms)                                                                                 | NA             |
|                                                      | 19a | If relevant, other important unintended consequences                                                                                                                                  | NA             |
| <b>Discussion</b>                                    |     |                                                                                                                                                                                       |                |
| Limitations                                          | 20  | Pilot trial limitations, addressing sources of potential bias and remaining uncertainty about feasibility                                                                             | 14             |
| Generalisability                                     | 21  | Generalisability (applicability) of pilot trial methods and findings to future definitive trial and other studies                                                                     | 13             |
| Interpretation                                       | 22  | Interpretation consistent with pilot trial objectives and findings, balancing potential benefits and harms, and considering other relevant evidence                                   | 13             |
|                                                      | 22a | Implications for progression from pilot to future definitive trial, including any proposed amendments                                                                                 | 14             |
| <b>Other information</b>                             |     |                                                                                                                                                                                       |                |
| Registration                                         | 23  | Registration number for pilot trial and name of trial registry                                                                                                                        | NA             |
| Protocol                                             | 24  | Where the pilot trial protocol can be accessed, if available                                                                                                                          | NA             |
| Funding                                              | 25  | Sources of funding and other support (such as supply of drugs), role of funders                                                                                                       | 15             |
|                                                      | 26  | Ethical approval or approval by research review committee, confirmed with reference number                                                                                            | 15             |

1 Citation: Eldridge SM, Chan CL, Campbell MJ, Bond CM, Hopewell S, Thabane L, et al. CONSORT 2010 statement: extension to randomised pilot and feasibility trials. BMJ. 2016;355.

2 \*We strongly recommend reading this statement in conjunction with the CONSORT 2010, extension to randomised pilot and feasibility trials, Explanation and Elaboration for important  
3 clarifications on all the items. If relevant, we also recommend reading CONSORT extensions for cluster randomised trials, non-inferiority and equivalence trials, non-pharmacological  
4 treatments, herbal interventions, and pragmatic trials. Additional extensions are forthcoming: for those and for up to date references relevant to this checklist, see [www.consort-statement.org](http://www.consort-statement.org).  
5  
6  
7  
8  
9  
10  
11  
12  
13  
14  
15  
16  
17  
18  
19  
20  
21  
22  
23  
24  
25  
26  
27  
28  
29  
30  
31  
32  
33  
34  
35  
36  
37  
38  
39  
40  
41  
42

For peer review only

# BMJ Open

## A person-centered support program (RESPECT intervention) for women with breast cancer treated with endocrine therapy: A feasibility study

|                                 |                                                                                                                                                                                                                                                                                            |
|---------------------------------|--------------------------------------------------------------------------------------------------------------------------------------------------------------------------------------------------------------------------------------------------------------------------------------------|
| Journal:                        | <i>BMJ Open</i>                                                                                                                                                                                                                                                                            |
| Manuscript ID                   | bmjopen-2022-060946.R1                                                                                                                                                                                                                                                                     |
| Article Type:                   | Original research                                                                                                                                                                                                                                                                          |
| Date Submitted by the Author:   | 08-Jul-2022                                                                                                                                                                                                                                                                                |
| Complete List of Authors:       | Ahlstedt Karlsson, Susanne; Sahlgrenska Academy, Health Care Sciences<br>Henoch, Ingela; Goteborgs Universitet, Institute of health and care sciences<br>Olofsson Bagge, Roger; Sahlgrenska Academy, Clinical Sciences<br>Wallengren, Catarina ; Sahlgrenska Academy, Health Care Sciences |
| <b>Primary Subject Heading</b>: | Nursing                                                                                                                                                                                                                                                                                    |
| Secondary Subject Heading:      | Nursing, Oncology                                                                                                                                                                                                                                                                          |
| Keywords:                       | Breast tumours < ONCOLOGY, Quality in health care < HEALTH SERVICES ADMINISTRATION & MANAGEMENT, QUALITATIVE RESEARCH                                                                                                                                                                      |
|                                 |                                                                                                                                                                                                                                                                                            |

SCHOLARONE™  
Manuscripts



I, the Submitting Author has the right to grant and does grant on behalf of all authors of the Work (as defined in the below author licence), an exclusive licence and/or a non-exclusive licence for contributions from authors who are: i) UK Crown employees; ii) where BMJ has agreed a CC-BY licence shall apply, and/or iii) in accordance with the terms applicable for US Federal Government officers or employees acting as part of their official duties; on a worldwide, perpetual, irrevocable, royalty-free basis to BMJ Publishing Group Ltd ("BMJ") its licensees and where the relevant Journal is co-owned by BMJ to the co-owners of the Journal, to publish the Work in this journal and any other BMJ products and to exploit all rights, as set out in our [licence](#).

The Submitting Author accepts and understands that any supply made under these terms is made by BMJ to the Submitting Author unless you are acting as an employee on behalf of your employer or a postgraduate student of an affiliated institution which is paying any applicable article publishing charge ("APC") for Open Access articles. Where the Submitting Author wishes to make the Work available on an Open Access basis (and intends to pay the relevant APC), the terms of reuse of such Open Access shall be governed by a Creative Commons licence – details of these licences and which [Creative Commons](#) licence will apply to this Work are set out in our licence referred to above.

Other than as permitted in any relevant BMJ Author's Self Archiving Policies, I confirm this Work has not been accepted for publication elsewhere, is not being considered for publication elsewhere and does not duplicate material already published. I confirm all authors consent to publication of this Work and authorise the granting of this licence.

1  
2  
3 **A person-centered support program (RESPECT intervention) for women with breast cancer**  
4  
5  
6  
7 **treated with endocrine therapy: A feasibility study**  
8  
9  
10

11 Ahlstedt Karlsson, Susanne<sup>1,2</sup> Orcid ID: 0000-0001-5436-5476; Henoeh, Ingela<sup>2</sup> Orcid ID: 0000-0002-1987-  
12 5419; Olofsson Bagge, Roger<sup>1,3</sup> Orcid ID: 0000-0001-5795-0355; Wallengren, Catarina<sup>2</sup> Orcid ID: 0000-0002-  
13 8124-1572  
14  
15

16  
17  
18 <sup>1</sup>Department of Surgery, Sahlgrenska University Hospital, Gothenburg, Sweden.

19 <sup>2</sup>Institute of Health and Care Sciences, Sahlgrenska Academy at the University of Gothenburg, University of  
20 Gothenburg, Gothenburg, Sweden

21 <sup>3</sup>Department of Surgery, Institute of Clinical Sciences, Sahlgrenska Academy at the University of Gothenburg,  
22 Gothenburg, Sweden.  
23  
24

25  
26 # Correspondence to: Ahlstedt Karlsson, Institute of Health and Care Sciences, Sahlgrenska Academy at the  
27 University of Gothenburg, University of Gothenburg, Gothenburg, Sweden

28  
29 E-mail: susanne.ahlstedt.karlsson@gu.se

30 Telephone: +46 704153666  
31  
32  
33  
34  
35  
36

37  
38 Keywords: Breast cancer, endocrine therapy, intervention, feasibility, person-centered support program  
39  
40  
41

42 Wordcount: 5590  
43  
44  
45  
46  
47  
48  
49  
50  
51  
52  
53  
54  
55  
56  
57  
58  
59  
60

## ABSTRACT

**Objective:** The aim of the study was to explore the feasibility of the trial design and patient acceptability of the intervention and outcome measures and to provide data to estimate the parameters required to design the final intervention.

**Design:** A controlled before-and-after design following the CONSORT 2010 statement for feasibility trials.

**Setting:** A surgical out-patient clinic in Sweden.

**Participants:** Forty-one patients (aged 47 – 85) with breast cancer and treated with endocrine therapy.

**Interventions:** Eligible patients were assigned to the control group or intervention group, which included individual education material, an individualized learning plan, and a personalized reminder letter using a person-centered approach. The intervention could be delivered as a telephone or digital follow-up during a 12 week follow up.

**Outcome measures:** The aims were to determine the recruitment rate, assess the rate of retention, explore whether the intervention was delivered according to the protocol, assess the preferred form of educational support, rate of education sessions, length per education session, and length between each education session, determine the distribution of education materials, and assess completion rates of patient-report instruments, including the General Self-efficacy Scale, the Quality of Care from the Patient's Perspective questionnaire, and the Memorial Symptom Assessment Scale.

**Results:** Eighty-six percent of the patients in the intervention group completed the intervention and completed the questionnaires three months after their inclusion. The call attendance was 90%. During the intervention, the contact nurse was compliant with the intervention protocol. For self-efficacy, symptoms, and quality of care, there were no differences in effect size between the control and intervention groups.

### Conclusions

This intervention seems to be feasible and acceptable among patients, and a telephone follow-up intervention also seems to be the preferred way to administer the intervention.



## Article summary

### *Strengths and limitations of this study*

- This is the first study to investigate the feasibility of a person-centered support model for patients with endocrine therapy.
- This study uses the CONSORT 2010 statement for feasibility trials.
- This study reports the recruitment rate, assess the rate of retention, explore whether the intervention was delivered according to the protocol, assess the preferred form of educational support, rate of education sessions, length per education session, and length between each education session, determine the distribution of education materials, and assess completion rates of patient-report instruments.
- Due to COVID-19 pandemic face-to-face sessions was restricted.

## BACKGROUND

For women diagnosed with hormone receptor-positive breast cancer, endocrine therapy (ET), i.e., the use of tamoxifen or aromatase inhibitors, is recommended for at least five years to reduce recurrence and rates of mortality<sup>1</sup>. A previous study reported that up to 91% of patients experience side effects from ET<sup>2</sup>, such as sleeping difficulties, hot flashes<sup>3,4</sup> and musculoskeletal symptoms<sup>5</sup>. Difficulties in managing these side effects have been reported to be obstacles to staying in treatment<sup>6</sup>. Other challenges that have been identified include older age<sup>7</sup>, medicine costs, or a general dislike of taking a regular medicine<sup>8</sup>. As ET is a long-lasting treatment, women may request support in managing challenges<sup>9</sup>. To manage challenges with ET, a partnership with health care professionals could be appropriate, as a previous study<sup>10</sup> identified that women with ET want to be able to manage their treatment but need guidance to do so.

Regarding the management of ET-related symptoms, previous studies have investigated the effect of symptom management interventions for patients prescribed ET<sup>11-13</sup>. A study identified management needs for ET symptoms, emotional needs, and needs for information acquisition and found that patients' relationship with health care providers was important<sup>12</sup>. A combination of information with cognitive behavioral therapy (CBT) to manage the side effects of tamoxifen showed successful results for the development of management skills in patients who were unable to stay in treatment<sup>11</sup>. Furthermore, training intervention with a physiotherapist or personal trainer followed by adapted training at home could be effective. However, a problem with this intervention was program adherence, as patients reported difficulty meeting the training goal in frequency and intensity due to other demands in life<sup>14</sup>. Also, training has not been found to have effect on musculoskeletal symptoms in patients treated with AIs<sup>15</sup>. Managing a disease and its additional challenges requires self-care knowledge and skills gained from a partnership with health care professionals<sup>16</sup>. Self-care involves the ability to both care for oneself and to achieve, promote and maintain optimal health<sup>17</sup>. A common feature of self-care and person-centered care (PCC) is an ability to view humans as the agent and the subject of action<sup>18,19</sup>. To include aspects of treatment important to the individual patient, such as different side effects, health care structures, fear of side effects, and lack of management skills and for support, a person-centered support program was developed<sup>10</sup>. As self-care requires knowledge and skills<sup>16</sup>, PCC could be appropriate for use in a support program. Self-care requisites are described as all elements that individuals need at all stages in life to care for themselves, i.e., air, food, water; self-care requisites also depend on how

1  
2  
3 individuals react to illness <sup>16</sup>. PCC can be a preferable way of identifying those requisites, as they can  
4 be identified in the narratives and used in the patient-health care provider partnership <sup>19</sup>. Patients are  
5 often motivated to engage in self-care, as they have personal interest in acquiring requisite knowledge  
6 and skills for performing self-care operations to reach their intended health goals <sup>16</sup>. It has been shown  
7 that when self-care capabilities increase <sup>20</sup>, self-efficacy and adherence to ET also increase <sup>21 22</sup>. Self-  
8 efficacy constitutes the self-image of the person and affects how people experience and behave in  
9 specific situations <sup>23</sup>. Previous studies using PCC have improved patients' self-efficacy <sup>24-26</sup>.

14  
15 It is important for patients to not only identify accurate information but also assess and integrate the  
16 information to gain increased knowledge, self-efficacy, and self-care skills <sup>10</sup>. Moreover, in addition to  
17 the emotional needs identified by Kim et al. (2020), it is important to assess the amount of needed  
18 information and to explore patients' understanding of the diagnosis and treatment <sup>27</sup>. For written health  
19 education materials to be effective, the patient must be able to apply the new information to her own  
20 life. This can be achieved by providing understandable examples and presenting the information so the  
21 patient sees its relevance to her situation <sup>28</sup>, as the ultimate reason for educating patients is to improve  
22 health <sup>29</sup>.

23  
24  
25 In Sweden all patients are allocated a contact nurse when being diagnosed with breast cancer. The  
26 contact nurse function as main point of contact during the patient's cancer treatments in order to reduce  
27 fragmented care and to strength patient involvement in care <sup>30</sup>. It has been suggested that contact  
28 nurses have a positive impact on care. Contact nurses aims to improve communication between patients  
29 and their health care professionals, as well as contact nurses are to improve the care process <sup>31</sup>. However,  
30 it has been reported that other factors seem to decrease contact nurses 'ability to provide the care they  
31 are meant to. Named reasons are challenges regarding the lack of information to patients, and lack of  
32 supportive care resources. Although the patients had a contact nurse, the patients reported how they  
33 lacked in the possibility to influence decisions about their care <sup>32</sup>.

34  
35  
36 A previous study developed a person-centered support program in collaboration among patients, health  
37 care professionals, researchers and managers with ET experience <sup>10</sup> and need to be tested in a feasibility  
38 study using the TIDieR checklist <sup>33</sup> and the CONSORT 2010 statement <sup>34</sup>. Previous studies have used  
39 feasibility studies prior to conducting a study in a larger setting <sup>9 35</sup>. The intervention was developed to  
40 encourage patients to be more actively involved in their care and wellbeing as partners with their contact  
41 nurse <sup>10</sup>.

## 42 43 44 45 46 47 48 49 50 51 52 53 54 55 56 **Aim**

57 In this feasibility trial, the aim was to explore the feasibility of the study design and the patient  
58 acceptability of the peRson-cEntred Support Program EndoCrine Therapy (RESPECT) intervention and  
59  
60

1  
2  
3 outcome measures and to provide data to estimate the parameters required to design the final  
4 intervention.  
5  
6  
7

8 The feasibility outcomes, i.e., primary outcomes, were as follows:

- 9 1. Determine recruitment rate
- 10 2. Assess the rate of retention
- 11 3. Explore whether the RESPECT intervention was delivered according to the protocol
- 12 4. Assess the preferred form of educational support
- 13 5. Assess the rate of education sessions
- 14 6. Assess the length per education session
- 15 7. Assess the length between each education session
- 16 8. Determine the distribution of education materials
- 17 9. Assess the completion rates of patient-report instruments, including of the General Self-efficacy  
18 Scale (GSE), the Quality from the Patient's Perspective questionnaire (QPP), and the Memorial  
19 Symptom Assessment Scale (MSAS)
- 20 10. Investigate whether self-efficacy, symptoms and satisfaction with care can be assessed  
21 appropriately by using the patient-report GSE, QPP, and MSAS.  
22  
23  
24  
25  
26  
27  
28  
29  
30  
31  
32  
33

## 34 **METHODS**

### 35 *Study design*

36 This was a feasibility trial using a controlled before-and-after design <sup>36</sup> to investigate the feasibility of  
37 the intervention, a person-centered support program aimed at empowering patients prescribed ET to  
38 manage ET-related symptoms and problems.  
39  
40  
41  
42

### 43 *Patient and public involvement*

44 Patients and health care professionals was involved in the design and development of the person-  
45 centered support model <sup>10</sup>. However, there was no patient involvement in the evaluation of the person-  
46 centered support model presented in this study.  
47  
48  
49  
50

### 51 *Participants*

52 Between September 2020 and June 2021, 66 potential female patients from one outpatient clinic at one  
53 university hospital in Sweden were identified as eligible for inclusion. The inclusion criteria were  
54 women > 18 years who had been diagnosed with breast cancer and treated with ET after surgery. Patients  
55 receiving adjuvant chemotherapy were excluded as the study aimed to investigate an intervention  
56 targeting patients treated with ET. All patients were contacted by a contact nurse and were invited by  
57  
58  
59  
60

telephone to participate in the study approximately three weeks after their surgery when being prescribed ET (Figures 1 and 2; Table 1). All patients were given verbal and written information about the study, and after agreeing to have an informed consent form sent to them by mail, they all provided written, informed consent. If the patient agreed to participate, she sent the informed consent form back using a prepaid envelope.

Please insert figure 1 and 2 about here

Table 1. Demographic and clinical characteristics of the participants in the control group (n=20) and intervention group (n=21) in the RESPECT project.

| Demographic characteristics           | Control group n=20 | Intervention group n=21 |
|---------------------------------------|--------------------|-------------------------|
| <i>Median age, years (range)</i>      | 65 (50-85)         | 66 (47-79)              |
| <i>Civil status, n (%)</i>            |                    |                         |
| <i>Married/cohabiting</i>             | 12 (63%)           | 16 (76%)                |
| <i>Single</i>                         | 8 (37%)            | 5 (23%)                 |
| <i>Ancestral homeland, n (%)</i>      |                    |                         |
| <i>Sweden</i>                         | 16 (80%)           | 18 (86%)                |
| <i>Scandinavian countries</i>         | 1 (5%)             | 1 (5%)                  |
| <i>Europe</i>                         | 1 (5%)             | 2 (10%)                 |
| <i>Outside Europe</i>                 | 1 (5%)             | 0 (0%)                  |
| <i>Education, n (%)</i>               |                    |                         |
| <i>University</i>                     | 9 (45%)            | 10 (48%)                |
| <i>High school</i>                    | 8 (40%)            | 8 (38%)                 |
| <i>Elementary school</i>              | 3 (15%)            | 3 (14%)                 |
| <i>Radiation therapy, n (%)</i>       | 16 (80%)           | 21 (100%)               |
| <i>Tumor size, median mm (range)</i>  | 14 (4-45)          | 12 (1-19)               |
| <i>Breast surgery</i>                 |                    |                         |
| <i>Mastectomy</i>                     | 4 (20%)            | 2 (10%)                 |
| <i>Partial mastectomy</i>             | 15 (75%)           | 19 (90%)                |
| <i>Axillary lymph node dissection</i> | 1 (0.5%)           | 0 (0%)                  |
| <i>Tamoxifen, n (%)</i>               | 9 (45%)            | 9 (43%)                 |
| <i>Aromatase inhibitor, n (%)</i>     | 11 (55%)           | 12 (57)                 |

#### *Control group*

Usual care (UC) involves patients being allocated a contact nurse (an experienced undergraduate nurse or postgraduate nurse in surgical care), as the Swedish Patient Act<sup>37</sup> gives patients a statutory right to permanent contact with health care. Internationally the role is called Clinical Nurse Specialist<sup>38</sup>, and are identified to be a valuable recourse in cancer care<sup>39</sup>.

1  
2  
3 Patients can contact the contact nurse all weekdays by telephone or by using a national digital tool,  
4 1177.se<sup>40</sup>. All patients receive written information as a brochure or a digital “My care and rehabilitation  
5 plan” when diagnosed with breast cancer. Support in usual care aims to give patients information about  
6 their state of health, available methods for examinations, care, and treatments, as well as information  
7 about at which time point she can expect to receive care and a permanent contact with the health care.  
8 The contact nurse writes down the information that is available before surgery, such as tumor  
9 characteristics and surgery preparations. The patient can also write down questions to bring to the  
10 oncoming appointments. Usual care is based on patients’ initiative to make contact (Figure 3).  
11  
12  
13  
14  
15  
16

### 17 *Intervention group*

18 The intervention was provided in a surgical outpatient clinic in western Sweden from December 2020-  
19 June 2021. The goal of the intervention is to empower patients prescribed ET to manage ET-related  
20 symptoms and problems. In addition to the UC, a 12-week intervention was offered to the participants  
21 in the intervention group (Figure 3) as described in a previous study<sup>10</sup>:  
22  
23  
24  
25

#### 26 *Step 1- Individual education material*

27 Using a PCC approach<sup>19</sup>, the contact nurse listened to patients narratives regarding their individual  
28 needs for knowledge and understanding, resources, goals and needs for support from the contact nurse.  
29 The timing of supplying individual educational materials depended on the individual patient’s needs,  
30 resources and goals during the 12-week intervention. Mutual trust was demonstrated, and the  
31 relationship between the patient and her contact nurse was reinforced through the assessment of the  
32 commonly agreed-upon individualized learning plan<sup>41</sup> study.  
33  
34  
35  
36  
37  
38

#### 39 *Step 2 - An individualized learning plan (ILP)*

40 An ILP was established depending on the individual patients’ needs for knowledge and understanding  
41 about ET and considering the patients’ resources, goals, and needs for education material and support  
42 from the contact nurse. In combination with the individual educational materials (step 1), a follow-up  
43 plan was made using telephone and/or digital follow-ups. Physical follow-ups were minimized as the  
44 COVID-19 pandemic was ongoing. The number of follow-up sessions and whether relatives were to be  
45 included during the 12-week intervention were agreed upon between the patient and the contact nurse.  
46 Patients could also refuse all education material and other materials and only use only the contact nurse  
47 for support.  
48  
49  
50  
51  
52  
53

#### 54 *Step 3 – A personalized reminder letter*

55 The third part of the support program was a personalized reminder letter after three months including  
56 contact information and an invitation for patients to make contact if needed.  
57  
58  
59  
60

Please insert Figure 3 about here

### *Education of the intervention nurse*

The aim of the education was to increase the intervention nurse's knowledge and understanding of ET, its problems and symptom management using PCC. Microteaching<sup>42 43</sup> sessions and seminars were used; the microteaching sessions were adapted to the specific needs of knowledge about endocrine therapy, side effects<sup>44</sup>, pedagogy<sup>45</sup> and PCC<sup>19 46</sup>, and the chosen approach was intended to help the contact nurse take responsibility for her own learning, i.e., student-centered learning<sup>47</sup>. Additionally, practical exercises were used, as the contact nurse was able to practice her knowledge and understanding in a care setting and reflect on it, and the intervention nurse's curiosity was used as a motivator to gain knowledge<sup>45</sup> (Table 2).

Table 2. Description of the education of the intervention nurse.

| <b>Before Lecture:</b> The intervention nurse is asked to specifically reflect on the following in the care setting:<br><i>Problems with endocrine therapy</i><br><i>Symptom management</i><br><i>Cocreation with patients, barriers, facilitators.</i> |                                                                                                                                                                          |                                                                                                                                                                                                                                                                                                                                   |                                                                         |
|---------------------------------------------------------------------------------------------------------------------------------------------------------------------------------------------------------------------------------------------------------|--------------------------------------------------------------------------------------------------------------------------------------------------------------------------|-----------------------------------------------------------------------------------------------------------------------------------------------------------------------------------------------------------------------------------------------------------------------------------------------------------------------------------|-------------------------------------------------------------------------|
| Sessions                                                                                                                                                                                                                                                | Content                                                                                                                                                                  | Learning outcomes                                                                                                                                                                                                                                                                                                                 | Learning activities                                                     |
| 1                                                                                                                                                                                                                                                       | Core principles about endocrine therapy (ET <sup>1</sup> ), including side effects of ET and symptom management described in research.<br><br>Symptom management theory. | -Describe symptom management methods.<br>-Suggest strategies for symptom management during ET.                                                                                                                                                                                                                                    | Clinical case discussions, microteaching sessions, dialogs, reflection. |
| <b>Before Lecture:</b> The intervention nurse is asked to reflect on practical situations in the care setting when <i>applying dialog</i> and <i>person-centered care (PCC<sup>2</sup>)</i> .                                                           |                                                                                                                                                                          |                                                                                                                                                                                                                                                                                                                                   |                                                                         |
| Session                                                                                                                                                                                                                                                 | Content                                                                                                                                                                  | Learning outcomes                                                                                                                                                                                                                                                                                                                 | Learning activities                                                     |
| 2                                                                                                                                                                                                                                                       | Pedagogical theory.                                                                                                                                                      | - Describe pedagogic strategies using dialog to increase patients' self-care.<br>- Describe pedagogical strategies to increase patient participation.<br>- Describe dialogical methodology that strengthens patient participation.<br>-Evaluate whether chosen pedagogical strategies increase patients' self-management ability. | Clinical case discussions, microteaching sessions, dialogs, reflection. |
| <b>Before Lecture:</b> The intervention nurse is asked to reflect on practical situations in the care setting using knowledge from Session 2 and <i>relate to PCC</i> in a care setting.                                                                |                                                                                                                                                                          |                                                                                                                                                                                                                                                                                                                                   |                                                                         |
| Session                                                                                                                                                                                                                                                 | Content                                                                                                                                                                  | Learning outcomes                                                                                                                                                                                                                                                                                                                 | Learning activities                                                     |
| 3                                                                                                                                                                                                                                                       | PCC in the clinical care setting.                                                                                                                                        | -Describe PCC.                                                                                                                                                                                                                                                                                                                    | Clinical case discussions, microteaching sessions, dialogs, reflection. |
| <b>Before Lecture:</b> The intervention nurse evaluates the <i>gained knowledge about PCC</i> in a practical situation in the care setting.                                                                                                             |                                                                                                                                                                          |                                                                                                                                                                                                                                                                                                                                   |                                                                         |



| Session                                                                                                                                                                                                                                                                                                                                                                                                                                                | Content                                                                                                                                                                                                                                                                               | Learning outcomes                            | Learning activities                             |
|--------------------------------------------------------------------------------------------------------------------------------------------------------------------------------------------------------------------------------------------------------------------------------------------------------------------------------------------------------------------------------------------------------------------------------------------------------|---------------------------------------------------------------------------------------------------------------------------------------------------------------------------------------------------------------------------------------------------------------------------------------|----------------------------------------------|-------------------------------------------------|
| 4                                                                                                                                                                                                                                                                                                                                                                                                                                                      | The three intervention components, i.e., individual education material, individualized learning plan, and a personalized reminder letter (Ahlstedt Karlsson, et al, 2022) with a starting point in the contact nurse's experience from a practical situation in the clinical setting. | -Explain the components of the intervention. | Clinical case discussions, dialogs, reflection. |
| <b>After Lecture:</b> With a starting point in the newly gained knowledge, <i>apply PCC, knowledge about ET, pedagogical theory and the three components</i> in the intervention in a care setting.                                                                                                                                                                                                                                                    |                                                                                                                                                                                                                                                                                       |                                              |                                                 |
| <b>Proficiency goal after completed education:</b><br>The intervention nurse can:<br>- Evaluate whether the proposed symptom management strategies increase the patient's management of ET-related symptoms.<br>- Assess whether the patient's need for care was met.<br>- Review and evaluate whether selected pedagogical strategies strengthen the patient's self-care ability.<br>- Evaluate the patient's participation in ET symptom management. |                                                                                                                                                                                                                                                                                       |                                              |                                                 |
| <b>Evaluation ability after completed education:</b><br>The intervention nurse can:<br>- Suggest strategies for managing symptoms in relation with ET.<br>- Together with the patient, identify care needs.<br>- Apply pedagogical strategies that strengthen patients' self-care ability.<br>- Apply dialogical methodology that strengthens patients' participation.                                                                                 |                                                                                                                                                                                                                                                                                       |                                              |                                                 |

Abbreviations: <sup>1</sup> Endocrine therapy – ET<sup>1</sup>, <sup>2</sup>Person-centered care- PCC.

### Data collection

Data were collected from September 2020 – June 2021. Feasibility outcomes were collected during the whole study period by the intervention nurse and were documented directly after every session in a trial log to secure the data collection<sup>48</sup>. The trial log contained a summary of the results of the feasibility criteria using Excel (Microsoft® Excel, version 16.50).

The three questionnaires were distributed by mail to patients in the control group (between September 2020 and December 2020) and the intervention group (December 2020 and March 2021). These three questionnaires were distributed at baseline, i.e., at the start of the intervention and ET, and three months after the start of the intervention.

The first questionnaire was the GSE, a 10-item (short form) psychometric scale that assesses optimistic self-beliefs to cope with a variety of demands in life. The GSE is a validated instrument that has been translated into Swedish<sup>49</sup> and has previously been used with breast cancer patients<sup>50</sup>. The total score is the mean value of respondents' answer to all items. High scores imply higher self-efficacy.

The second questionnaire was the QPP, a 45-item instrument that measures satisfaction in four dimensions: medical-technical competence, physical-technical conditions, identity-oriented approach, and sociocultural atmosphere<sup>51 52</sup>. Moreover, to identify patients' views of whether the health care was adapted to their needs rather than health care routines, three items (*I was given the possibility to tell the medical staff how I experienced my situation; I was given the opportunity to participate in the planning of my care/treatment; I received the information I needed to be able to participate in decisions about*



1  
2  
3 *my own care and treatment*) that were previously used by the Swedish SOM institute were added<sup>53</sup>. To  
4 calculate the execution index, each question is scored in terms of actual experience and subjective  
5 importance, each on a four-point Likert scale. The execution index score ranges from 1–7, where one is  
6 inadequate quality of care from the patient perspective and seven is good quality of care<sup>54</sup>.  
7  
8  
9

10 The last questionnaire was the MSAS, a 32-question instrument for patients to rate their symptoms on  
11 a 5-point Likert scale<sup>55 56</sup>. The instrument has been validated in Swedish breast cancer patients<sup>56</sup> and  
12 has previously been used with breast cancer patients<sup>50</sup>. The total MSAS score is the average of the  
13 symptom scores for all 32 symptoms. Each symptom score is an average of the dimensions and includes  
14 the number of symptoms, how often patients experienced them, the severity of the symptoms and the  
15 cause of distress.  
16  
17  
18  
19

### 20 21 *Feasibility outcomes*

22 In this study, feasibility outcomes are defined as primary outcome. Craig et al. (2013) described several  
23 challenging variables that can affect an intervention's results and conclusions. The feasibility  
24 classification (process, resources, scientific) and feasibility criteria reported by Thabane et al. (2019)  
25 and Lancaster et al. (2004) were used to collect feasibility data. Based on the recommendations for  
26 feasibility studies and an expected attrition rate of 20%, the sample size was set to 20 participants in  
27 each group<sup>57</sup>. To determine whether the chosen feasibility criteria were successful<sup>58</sup>, criteria for  
28 success were stated according to the CONSORT 2010 statement<sup>34</sup>;  
29  
30  
31  
32  
33  
34

35 The intervention process was assessed with the feasibility criteria as follows:

- 36  
37 1. Recruitment was studied to determine whether the patients were willing to participate in the  
38 study. It has been suggesting that the loss of participants should be less than 15%<sup>59</sup>. The  
39 criterion was determined to be successful if the percentage rates of recruitment were > 70%.
- 40  
41 2. Retention was studied to determine whether the patients were willing to remain for the entire  
42 study period, i.e., 12 weeks. The criterion was determined to be successful if the percentage  
43 rates of retention were >70%.
- 44  
45 3. Compliance with the intervention protocol was studied to determine if the patients were offered  
46 the three parts of the planned intervention, i.e., education materials, learning plan and  
47 personalized letter. The criterion was determined to be successful if all three parts of the  
48 intervention were offered.  
49  
50  
51  
52  
53

54 The resources used in the intervention were assessed with the feasibility criteria as follows:

- 55  
56 4. Form of educational support was studied to determine the preferred form of educational support  
57 during the intervention period, i.e., 12 weeks. The criterion was determined to be successful if  
58  
59  
60

one of the three forms of educational support (face-to face, telephone, and digital) were requested by the patients.

5. Number of educational sessions was studied to determine how many educational opportunities the patient used during the intervention period, i.e., 12 weeks. The criterion determined to be successful if no more than four education sessions were used by each patient.
6. Length per education session was studied to determine how much time the patient used in each education session. The criterion was determined to be successful if < 45 minutes was used per education session. The time was clocked by the intervention nurse.
7. Length between each education session was studied to determine how often women wanted to have education opportunities. The criterion was determined to be successful if there were no more than four weeks between each education session.
8. Distribution of education materials was studied to determine how much of intervention materials the patients received during the study. The criterion was determined to be successful if the distribution of education materials was >70%.

The scientific challenges of the intervention were assessed with the feasibility criteria as follows:

9. Completion rate of questionnaires was studied to determine if the patient was willing to answer the questionnaires, i.e., at baseline and 12 weeks. The criterion was determined to be successful if the percentage rates of patient completion of questionnaires were > 70% at baseline and 12 weeks.
10. The estimated treatment effect was studied to determine if the selected instruments were appropriate to measure patients' self-efficacy, quality of care, and symptoms. The criterion was determined to be successful if there were any changes in the self-report measures between the first and second points of measurement.

Patients included in the study responded to the questionnaires and returned the questionnaires in a prepaid envelope.

### Analysis

To analyze demographic variables, we used descriptive statistics (number, percent, mean, range). We calculated the percentage rates of recruitment, retention, and completion of questionnaires. We calculated the number, median and range of educational sessions, distribution of education materials, length per education session, and length between each education session. As the study was a feasibility test, no hypothesis testing was applied<sup>60</sup>, but p-values were calculated and presented to value their relevance in an forthcoming RCT. Descriptive statistical analyses and the Mann-Whitney U-test were performed to identify the experience of symptoms, satisfaction with care and perceived self-efficacy. P-

1  
2  
3 values below .05 were considered statistically significant, and all analyses were performed with IBM®  
4 SPSS® Statistics version 27 (IBM SPSS Statistics for Macintosh, Version 27.0).  
5  
6  
7  
8  
9  
10  
11  
12

## 13 RESULTS

### 14 *Participant demographics*

15  
16 In the control group, the median age was 65 years, 80% of the participants were born in Sweden, 63%  
17 were cohabiting and 45% were prescribed tamoxifen. In the intervention group, the median age was 66  
18 years, 86% were born in Sweden, 76% were cohabiting and 43% were prescribed tamoxifen (Table 1).  
19  
20  
21

### 22 *Feasibility classification and criteria*

23 Feasibility outcomes are presented in line with the CONSORT 2010 statement as follows:  
24  
25

#### 26 1. *Recruitment*

27 In the control group, 22 eligible patients were screened, and 20 were approached at the clinic, of whom  
28 20 consented to participate (100%). In the intervention group, 44 patients were screened, of whom 24  
29 were approached and 21 consented to participate (88%) (Table 1), and patients was enrolled from  
30 December 2020 – April 2021. Of the three patients who did not consent to participate in the intervention  
31 group, two indicated the number of questions in the questionnaires to be a reason for not participating.  
32 One patient gave no reason for not participating (Figure 1, 2).  
33  
34  
35

#### 36 2. *Retention*

37 In the intervention group, 20 patients completed (95%). One patient dropped out from the intervention  
38 because the study reminded her about the breast cancer surgery, which she was trying to forget about  
39 (Figure 1).  
40  
41  
42

#### 43 3. *Compliance with the intervention protocol*

44 In the first session, the patients' needs for knowledge and understanding, resources, goals and support  
45 from the contact nurse were identified in their narratives. Education material was offered accordingly  
46 using a written agreement between the patient and contact nurse and documented in the ILP. Patients  
47 decided with the contact nurse whether they required knowledge. If they required knowledge, they stated  
48 when they wanted the education materials and which parts. Their need for knowledge ranged between  
49 having everything sent after the first session and having some of the education material sent at the end  
50 of the intervention. Patients could state that they did not want any education material at the start of the  
51 intervention but would reevaluate their needs during the 12 weeks of the intervention. However, since  
52 the ILP was sent home with the patients, any changes in the plan had to be documented by the patient  
53 herself. Two patients received the education materials sent to them but did not want to read it, just to  
54  
55  
56  
57  
58  
59  
60

1  
2  
3 have it if they wanted to read it later. Seven patients did not want the intervention for the full 12-week  
4 period (33%) but stated that they would make contact if they needed further information during the  
5 intervention. One patient wanted her partner to be included. Two patients in the intervention group did  
6 not answer the telephone at the scheduled session, making the call attendance 90%. One patient  
7 rescheduled a session due to personal reasons. Thirty-three percent of the patients did not want follow-  
8 up sessions during the full 12-week intervention. As 90% of the patients wanted all educational  
9 materials, 10% of the patients used only the contact nurse for support and one hundred percent of the  
10 patients received a personalized reminder letter (Table 3).

11 Contact information and an invitation for patients (100%) to make contact if needed were sent after 12  
12 weeks in the personalized letter. None of the patients made contact after the 12-week intervention as  
13 shown in Table 3.

#### 21 22 4. *Resources*

23 None of the patients wanted to have face-to-face sessions as educational support. In fact, several of the  
24 patients stated that it was important to not have to come for appointments at the hospital. Reasons for  
25 not wanting to come to the hospital were related to the COVID-19 pandemic as well as to perceptions  
26 of appointments at the hospital being time consuming. All patients but one preferred telephone sessions.  
27 If a patient had asked for a face-to-face follow-up session, this would have been managed accordingly,  
28 with arrangements made to ensure safety in the context of the COVID-19 pandemic. Face-to-face  
29 meetings at the hospital with patients were not prohibited but restricted. However, no patient-contact  
30 nurse pairs participated in a face-to-face session; had they done so, both the patient and the contact nurse  
31 would have had to wear face masks, and the contact nurse would have also had to wear a plastic face  
32 shield to prevent transmission of the COVID-19 virus.

#### 33 34 35 36 37 38 39 5. *Number of educational sessions*

40 The number of educational sessions ranged between two and four sessions (Table 3).

#### 41 42 43 6. *Length per education session*

44 Telephone support sessions ranged between 5 and 60 minutes, and digital support sessions ranged  
45 between 30 and 45 minutes (Table 3) and was clocked by the intervention nurse.

#### 46 47 48 7. *Length between education sessions*

49 The length between follow-up sessions ranged between 1 and 6 weeks (Table 3).

#### 50 51 8. *Distribution of education materials*

52 All patients (100%) wanted part 1 of the individual education material. Further description of the  
53 distribution is shown in Table 3.

#### 54 55 56 57 58 59 60 9. *Completion rate of questionnaires*

In the control group, 95% completed the first questionnaires at baseline, as one patient questionnaire was lost in the mail. At three months, 95% of patients responded to their surveys. In the intervention group, 100% responded to the first questionnaires, and 86% responded to the follow-up questionnaires after three months. At the first measurement point, two reminder messages were sent to three patients in the intervention group before one patient was recorded as a drop out. At the second measurement point, one reminder message was sent to six patients three weeks after the questionnaires were sent. A second reminder message was sent approximately two weeks later to five patients, and as two patients did not return their questionnaires, they were recorded as drop-outs. Two patients in the intervention group did not answer the telephone at the scheduled session, making the call attendance 90%. One patient rescheduled a session due to personal reasons.

#### 10. Estimated treatment effect

Differences between the control and intervention groups in perceived self-efficacy (0.5 and 0,  $p=0.731$ ) and reported number of symptoms according to the MSAS (2 and 1,  $p=0.724$ ) after 3 months were observed (Figure 4; Table 4). Quality of care was measured using QPP. Overall, the patients in the control group had higher quality of care index scores than patients in the intervention group (Table 5).

Table 3. Resource needs for the intervention

| <b>RESPECT</b>                                                                                    |            |
|---------------------------------------------------------------------------------------------------|------------|
| <b>Distributed educational material</b>                                                           |            |
| Individual educational material <i>Part 1</i> , n                                                 | 21         |
| Individual educational material <i>Part 2</i> , n                                                 | 20         |
| Individual educational material <i>Part 3</i> , n                                                 | 19         |
| Individual educational material <i>Part 4</i> , n                                                 | 19         |
| Individual educational material<br><i>Information about tamoxifen or aromatase inhibitors</i> , n | 20         |
| Additional educational material from the patient needs:<br>Complementary medicine, n              | 1          |
| Sleep advice, n                                                                                   | 1          |
| Recommendations about internet sites:<br>Sleep advice, n                                          | 2          |
| <b>Form of education and educational sessions per patient</b>                                     |            |
| Face to face (n=0), median (range)                                                                | 0 (-)      |
| Telephone (n=20), median (range)                                                                  | 3 (2-4)    |
| Digital (n=1), median (range)                                                                     | 1 (1)      |
| <b>Length (minutes) per sessions</b>                                                              |            |
| Telephone (n=20), median (range)                                                                  | 20 (5-60)  |
| Digital (n=1), median (range)                                                                     | 30 (30-45) |
| <b>Length of time (weeks) between each session</b>                                                |            |
| Telephone follow-up education sessions, weeks, median (range)                                     | 4 (1-6)    |
| Digital meeting follow-up sessions, weeks, median (range)                                         | 4 (-)      |
| <b>Follow-up educational session</b>                                                              |            |
| Time from 1 <sup>st</sup> session to 2 <sup>nd</sup> session, weeks, median (range)               | 2 (1-8)    |
| Time from 2 <sup>nd</sup> session to 3 <sup>rd</sup> session, weeks, median (range)               | 4 (2-8)    |
| Time from 3 <sup>rd</sup> session to 4 <sup>th</sup> session, weeks, median (range)               | 4 (2-5)    |

Table 4. Median differences at baseline and 3 months in the control group and intervention group.

|                              | Control                   |                        |                               | Intervention              |                           |                               | p-value* |
|------------------------------|---------------------------|------------------------|-------------------------------|---------------------------|---------------------------|-------------------------------|----------|
|                              | Baseline No, Median (IQR) | 3 months, Median (IQR) | Change from baseline (median) | Baseline No, Median (IQR) | 3 months No, Median (IQR) | Change from baseline (median) |          |
| SE, median (IQR)             | 31 (27-40)                | 31 (22-39)             | 0.5                           | 30 (26-35)                | 30 (30-38)                | 0                             | 0.731    |
| MSAS, no median (IQR)        | 6 (3-11)                  | 9 (3-18)               | 2                             | 7 (3-13)                  | 10 (5-22)                 | 1                             | 0.724    |
| MSAS, often, median (IQR)    | 11 (2-36)                 | 13 (6-38)              | 7.5                           | 14 (4-25)                 | 15 (7-49)                 | 2                             | 0.504    |
| MSAS, severe, median (IQR)   | 12 (0-26)                 | 13 (5-52)              | 5                             | 10 (3-23)                 | 13 (6-40)                 | 2                             | 0.393    |
| MSAS, distress, median (IQR) | 11 (0-28)                 | 12 (3-30)              | 5.5                           | 8 (2-19)                  | 12 (6-39)                 | 2                             | 0.600    |

\*Mann-Whitney test comparing changes from baseline between the control and intervention groups.

Table 5. Interpretation of the QPP – Percentage agreement in a selection of QPP questions

|                                                                                                  | Control 3 months, n (%) | Intervention 3 months, n (%) |
|--------------------------------------------------------------------------------------------------|-------------------------|------------------------------|
| 13. I received useful information on what I needed to be able to participate in my own care      | 16* (93.75%)            | 17* (88.24%)                 |
| 19. I had adequate information about my medicine, so I understood the effect and how to use them | 18* (77.78%)            | 18* (72.22%)                 |
| 20. I had an opportunity to share my experience with the health care professionals               | 15* (86.67%)            | 17* (82.35%)                 |
| 32. I had a good opportunity to confer in decisions about my own care                            | 14* (85.71%)            | 15* (73.33%)                 |
| 33. I had a good opportunity to participate in my own care                                       | 15* (86.67%)            | 12* (75.00%)                 |
| 34. My care was directed by my needs rather than the health care professionals' routines         | 16* (100%)              | 17* (82.35%)                 |

\*Caution: If less than 30, the results should be regarded with caution.

To measure perceived reality concerning the quality of care, every question was phrased as a statement. The response alternatives were given as a scale between 4 (Fully agree) and 1 (Do not agree at all). Percentage in agreement represents the patients who answered 3 (Mostly agree) and 4 (Fully agree) divided by the total number of patients who answered 1-4 on the question. Answer 5 (Not applicable) is not included.

**Please insert Figure 4 about here**



## DISCUSSION

The results show that the intervention was feasible regarding the classification process and resources. However, it was less feasible regarding scientific challenges. The recruitment methods used seem to be accurate and feasible for an RCT with the aim of empowering patients prescribed ET to manage ET-related symptoms and problems. As a before-and-after design was used, the risk of contamination between groups was minor, as the intervention nurse had minor clinical contact with the control group.

The most common problems reported by trial investigators have been identified as a lack of adherence to the trial protocol, difficulties with recruitment, data collection and the intervention itself<sup>61</sup>; however, during the intervention, the contact nurse succeeded in adhering to the trial protocol. Moreover, a weakness in interventions has been reported to be a lack of theoretical approach<sup>62</sup>; to address this challenge, the presented study was founded on a theoretical model<sup>44</sup>. Modeling was used to identify pitfalls and barriers<sup>63</sup>. The contact nurse in the intervention pretested the intervention protocol in clinical meetings with patients before launching the support program. It is crucial for health care professionals to have deep insight into the theory and selected methods to increase patients' required knowledge about ET since no one will adhere to a protocol if the protocol is of no significance<sup>45</sup>. Moreover, a health care context is referred to as a complex adaptive system, as it contains a collection of individuals with the freedom to act in a way that is not always predictable and changes depending on the context. Moreover, a complex adaptive system has fuzzy boundaries, and health care professionals' priorities depend on, for example, their private lives and things they would not sacrifice to follow a study protocol<sup>64</sup>. These challenges need to be addressed, as the intervention is to be applied in a care setting.

Furthermore, as the follow up is flexible and the patients decided, in a partnership with the contact nurse, how many educational sessions were required, the patient's individuality and resources were a focus, and no patient needed to acquire education than necessary. This needed flexibility is another component making the intervention a complex intervention. Moreover, the COVID-19 pandemic has increased the use of digital follow-up, which seems to be well liked among patients<sup>65-67</sup>. Furthermore, face-to-face sessions were not prohibited during the intervention but were restricted due to the COVID-19 pandemic. If a patient would have asked for a face-to-face session, this would have been managed to not put the patient, fellow patients, or the contact nurse or other health care professionals in danger. However, we cannot specifically state that patients would prefer telephone sessions under other circumstances, but telephone follow-up seems to be suitable, as patients indicated physical appointments to be time consuming. A previous study also used telephone follow-up to increase confidence in controlling illness in patients with chronic obstructive pulmonary disease with positive results in controlling symptoms ( $p=.028$ )<sup>68</sup>, and telephone follow-ups found to be well liked among registered nurses<sup>69</sup>. A previous study using PCC also allowed patients to decide the number of follow-up sessions<sup>70</sup>. Thus, this approach could be a preferable way to administer the intervention and could also be more cost-effective, as

1  
2  
3 patients do not need to attend more sessions than required; however, it needs to be evaluated further.  
4 Furthermore, all health care professionals do not have a PCC approach, which might affect the responses  
5 in the questionnaires and the interpretation of the results. To manage this, the whole care chain needs to  
6 structure their work according to PCC, as in a previous study <sup>24</sup>.  
7  
8  
9

10 Moreover, the intervention protocol ranged over 12 weeks, as this period has been identified as the most  
11 troublesome for patients with ET <sup>71</sup>, and a previous study identified that the start of the ET period could  
12 be preferable for an intervention <sup>35</sup>. As 67% of the patients wanted education during the full 12-week  
13 intervention, 12 weeks is indicated to be a suitable length for a support program in a future RCT.  
14 However, an optional follow-up session after six months, when the patients have more experience with  
15 ET, could be appropriate, but measures would need to be taken to help patients stay focused on ET when  
16 responding to the questionnaires. A later session could also be preferable for patients who do not want  
17 to be educated during the first months undergoing ET <sup>35</sup>.  
18  
19  
20  
21  
22  
23

24 To address scientific challenges, two measurement points were used, baseline and three months after  
25 being prescribed ET. In an RCT, additional measurement points could be added at six and 12 months.  
26 However, there were no differences in self-efficacy between the control and intervention groups; rather,  
27 both the control group and the intervention had high self-efficacy scores at baseline, indicating that the  
28 ceiling level was reached. Higher education implies higher self-efficacy <sup>72</sup> ( $p = .017$ ) <sup>73</sup>. In the present  
29 study, 45% of the patients in the control group and 48% of the patients in the intervention group had  
30 university education, indicating that the GES may not be suitable as an instrument. General self-efficacy  
31 has been increased using PCC in a previous study in patients with acute coronary syndrome <sup>70</sup>, indicating  
32 that breast cancer patients could also benefit from PCC. This is of importance, as low self-efficacy has  
33 been identified as a predictor of terminating ET prematurely <sup>74</sup> due to beliefs about its low influence on  
34 health or low satisfaction with involvement in health care <sup>74</sup>.  
35  
36  
37  
38  
39  
40  
41  
42

43 Moreover, there was no difference in perceived symptoms, indicating either that the MSAS  
44 questionnaire was inadequate or that the knowledge itself did not decrease symptoms if patients did not  
45 use coping activities. The support program aims to educate and empower patients but does not evaluate  
46 whether they use their knowledge. It is also important to determine whether patients do use the coping  
47 strategies gained from the follow-up sessions, but the advice just does not work, in which case an  
48 adjustment in the provided education is needed. Additionally, it is important to identify whether coping  
49 demands could be overwhelming and decrease instead of increase quality of life, leading patients to not  
50 pursue coping strategies such as physical activities. This might be a topic to address before an RCT  
51 study, using interviews to evaluate participants' use of the gained knowledge.  
52  
53  
54  
55  
56  
57

58 The study had some limitations. As the COVID-19 pandemic was ongoing, there were restrictions on  
59 the patients' ability to have face-to-face sessions with the trial leader. However, several patients stated  
60



1  
2  
3 that they would participate only if there were no mandatory sessions at the hospital. The patients also  
4 had the possibility of having their sessions using a digital conference system. As the intervention contact  
5 nurse and the participants almost never met in person, their relationships could have been affected.  
6  
7 However, a partnership was established between the patient and the trial leader using a PCC protocol.  
8  
9 This might have decreased the effect of not meeting in person. In a future RCT, it will be crucial for  
10 patients to have face-to-face relationships with the intervention contact nurse with whom they will build  
11 partnerships. This study did not identify when the intervention should stop, as it was decided before the  
12 intervention that it should last for 12 weeks. It might have been important for the patients in the  
13 intervention to have given this important information. However, seven of the 21 patients did not use the  
14 full 12-week intervention, which implies that a 12-week support program is suitable. No patient actively  
15 asked for longer follow up. All patients were allocated a contact nurse whom they could contact after  
16 the intervention if further questions were answered.  
17  
18

19  
20 Furthermore, there was no measurement regarding the number of contacts the patients in the control  
21 group had with their contact nurse; in a future RCT, this must be controlled to evaluate the economic  
22 effectiveness of the intervention. Moreover, using the QPP for the three-month measurement point was  
23 troublesome, as patients also had undergone radiation therapy during the same period, and patients also  
24 stated that their responses addressed the whole care chain and not only the care given related to ET. This  
25 could imply the difficulty of interpreting data from the QPP at the second measurement point.  
26  
27 Furthermore, according to the instrument owner, 30 patients in each group are required to interpret the  
28 data. Also, the patients in the intervention group was included when physical appointments was  
29 restrained which imply further difficulty to draw any conclusions from the presented results.  
30  
31  
32  
33  
34  
35  
36  
37

38 The MSAS was developed using 33 symptoms commonly associated with cancer<sup>55</sup>, and it has been  
39 validated in the Swedish population using patients diagnosed with breast cancer and treated with  
40 chemotherapy, radiotherapy and ET<sup>56</sup>. However, a more specific questionnaire could be appropriate,  
41 more accurate and easier for patients to complete, as the MSAS consists of three dimensions, and some  
42 of the participants did not provide responses for all three dimensions included in the questionnaire.  
43  
44  
45  
46  
47

### 48 **Conclusion**

49 This intervention seems to be feasible regarding its process and resources and acceptable among  
50 patients, as 95% completed the 12-week support program and 86% responded to the three-month  
51 questionnaire. A telephone follow-up intervention seems to be the preferable way to administer the  
52 intervention. However, for self-efficacy and symptoms, there were no differences in effect size between  
53 the control and intervention groups, indicating that the intervention was less feasible regarding scientific  
54 challenges.  
55  
56  
57  
58  
59  
60

1  
2  
3  
4  
5 *Ethical approval*

6 Patients were informed, in accordance with the Declaration of Helsinki <sup>75</sup>, that their participation was  
7 voluntary and could be terminated at any time without consequences. They were also assured that their  
8 confidentiality would be respected throughout the research process. This study was approved by the  
9 Swedish Ethical Review Authority (approval no 2020-03239).  
10  
11  
12  
13

14 *Conflicts of Interest*

15 The authors report no conflicts of interest.  
16  
17

18 *Contributorship statement*

19 IH, SAK, ROB, CW: Conceptualizing and design, IH, SAK, CW: Methodology, SAK: Data  
20 Collection, IH, SAK, CW, ROB, Formal Analysis: IH, SAK, CW, ROB: Visualization, IH, SAK, CW,  
21 ROB: Writing-review and editing.  
22  
23  
24  
25

26 *Availability statement*

27 Data are available upon reasonable request.  
28  
29  
30

31 *Source of Funding*

32 Susanne Ahlstedt Karlsson has received honoraria from R&D Council in Gothenburg and Bohuslän  
33 (VGFOUGSB-932984). Ingela Henoch is currently receiving a grant from the Brostcacerforbundet. For  
34 the remaining authors none were declared. The authors have no conflicts of interest to disclose.  
35  
36  
37  
38

39 *Acknowledgments*

40 We thank all patients for sharing their personal experiences of life with ET. We would also like to thank  
41 the staff of the surgical outpatient care unit for contributing to finding eligible patients to include in the  
42 study.  
43  
44  
45  
46  
47  
48  
49  
50  
51  
52  
53  
54  
55  
56  
57  
58  
59  
60

## References

1. Davies C, Godwin J, Gray R, et al. Relevance of breast cancer hormone receptors and other factors to the efficacy of adjuvant tamoxifen: patient-level meta-analysis of randomised trials. *Lancet* 2011;378(9793):771-84. doi: 10.1016/S0140-6736(11)60993-8
2. Berkowitz MJ, Thompson, C. K., Zibecchi. L.T., Lee, M.K., Streja, E., Berkowitz. J.S., Wenziger. C. M, Bake. J.L., Di Nome. M.L., Attai. D.J. How patients experience endocrine therapy for breast cancer: an online survey of side effects, adherence, and medical team support. *Journal of Cancer Survivorship* 2020;15:29–39. doi: 10.1007/s11764-020-00908-5.
3. Ahlstedt Karlsson, Wallengren C, Olofsson Bagge R, et al. Women's coping strategies during the first three months of adjuvant endocrine therapy for breast cancer. *Nurs Open* 2019;7(2):605 - 12. doi: 10.1002/nop2.430. [published Online First: 2020/02/25]
4. Moon, Hunter MS, Moss-Morris R, et al. Factors related to the experience of menopausal symptoms in women prescribed tamoxifen. *J Psychosom Obstet Gynaecol* 2017;38(3):226 - 35. doi: 10.1080/0167482X.2016.1216963. [published Online First: 2016/09/02]
5. Nabieva N, Fehm T, Haberle L, et al. Influence of side-effects on early therapy persistence with letrozole in post-menopausal patients with early breast cancer: Results of the prospective EvAluate-TM study. *Eur J Cancer* 2018;96:82 - 90. doi: 10.1016/j.ejca.2018.03.020. [published Online First: 2018/04/22]
6. Bluethmann SM, Murphy CC, Tiro JA, et al. Deconstructing decisions to initiate, maintain, or discontinue adjuvant endocrine therapy in breast cancer survivors: A mixed-methods study. *Oncol Nurs Forum* 2017;44(3):E101–E10. doi: 10.1188/17.ONF.E101-E110. [published Online First: 2017/06/22]
7. Cavazza M, Banks H, Ercolanoni M, et al. Factors influencing adherence to adjuvant endocrine therapy in breast cancer-treated women: using real-world data to inform a switch from acute to chronic disease management. *Breast Cancer Res Treat* 2020;183:189–99. doi: 10.1007/s10549-020-05748-6. [published Online First: 2020/06/28]
8. Shinn EH, Broderick G, Fellman B, et al. Simulating time-dependent patterns of nonadherence by patients with breast cancer to adjuvant oral endocrine therapy. *JCO Clin Cancer Inform* 2019;3:1 - 9. doi: 10.1200/CCI.18.00091. [published Online First: 2019/04/20]
9. Di Meglio A, Soldato D, Presti D, et al. Lifestyle and quality of life in patients with early-stage breast cancer receiving adjuvant endocrine therapy. *Curr Opin Oncol* 2021 doi: 10.1097/CCO.0000000000000781 [published Online First: 2021/08/31]
10. Ahlstedt Karlsson S, Hensch I, Olofsson Bagge R, et al. An intervention mapping-based support program that empowers patients with endocrine therapy management. *Evaluation and Program Planning* 2022:102071. doi: <https://doi.org/10.1016/j.evalprogplan.2022.102071>
11. Moon, Moss-Morris R, Hunter MS, et al. Development of a self-management intervention to improve tamoxifen adherence in breast cancer survivors using an Intervention Mapping framework. *Support Care Cancer* 2020 doi: 10.1007/s00520-020-05850-x. [published Online First: 2020/10/30]

12. Kim SH, Park S, Kim SJ, et al. Self-management Needs of Breast Cancer Survivors After Treatment: Results From a Focus Group Interview. *Cancer Nurs* 2020;43(1):78-85. doi: 10.1097/NCC.0000000000000641. [published Online First: 2018/08/28]
13. Shelby RA, Dorfman CS, Bosworth HB, et al. Testing a behavioral intervention to improve adherence to adjuvant endocrine therapy (AET). *Contemp Clin Trials* 2019;76:120-31. doi: 10.1016/j.cct.2018.11.010 [published Online First: 2018/11/26]
14. Duijts SF, van Beurden M, Oldenburg HS, et al. Efficacy of cognitive behavioral therapy and physical exercise in alleviating treatment-induced menopausal symptoms in patients with breast cancer: results of a randomized, controlled, multicenter trial. *J Clin Oncol* 2012;30(33):4124-33. doi: 10.1200/JCO.2012.41.8525 [published Online First: 2012/10/10]
15. Roberts KE, Rickett K, Feng S, et al. Exercise therapies for preventing or treating aromatase inhibitor-induced musculoskeletal symptoms in early breast cancer. *Cochrane Database Syst Rev* 2020;1:CD012988. doi: 10.1002/14651858.CD012988.pub2 [published Online First: 2020/01/30]
16. McLaughlin Renpenning KT, S, G. Self-Care Theory in Nursing. Selected Papers of Dorothea Orem. *New York Springer Publishing Company* 2003
17. Richard AA, Shea K. Delineation of self-care and associated concepts. *J Nurs Scholarsh* 2011;43(3):255-64. doi: 10.1111/j.1547-5069.2011.01404.x [published Online First: 2011/09/03]
18. Denyes MJ, Orem DE, Bekel G, et al. Self-care: a foundational science. *Nurs Sci Q* 2001;14(1):48-54. doi: 10.1177/089431840101400113 [published Online First: 2002/03/05]
19. Ekman I, Swedberg K, Taft C, et al. Person-centered care--ready for prime time. *Eur J Cardiovasc Nurs* 2011;10(4):248-51. doi: 10.1016/j.ejcnurse.2011.06.008. [published Online First: 2011/07/19]
20. Bag E, Mollaoglu M. The evaluation of self-care and self-efficacy in patients undergoing hemodialysis. *J Eval Clin Pract* 2010;16(3):605-10. doi: 10.1111/j.1365-2753.2009.01214.x [published Online First: 2009/10/31]
21. Toivonen KI, Williamson TM, Carlson LE, et al. Potentially Modifiable Factors Associated with Adherence to Adjuvant Endocrine Therapy among Breast Cancer Survivors: A Systematic Review. *Cancers (Basel)* 2020;13(1) doi: 10.3390/cancers13010107 [published Online First: 2021/02/10]
22. Moon, Moss-Morris R, Hunter MS, et al. Barriers and facilitators of adjuvant hormone therapy adherence and persistence in women with breast cancer: a systematic review. *Patient Prefer Adherence* 2017;11:305-22. doi: 10.2147/PPA.S126651 [published Online First: 2017/03/07]
23. Bandura A. Self-efficacy. The exercise of control. *WH Freeman New York* 1997
24. Fors A, Taft C, Ulin K, et al. Person-centred care improves self-efficacy to control symptoms after acute coronary syndrome: a randomized controlled trial. *Eur J Cardiovasc Nurs* 2016;15(2):186-94. doi: 10.1177/1474515115623437 [published Online First: 2015/12/25]
25. Ali L, Wallstrom S, Ekman I, et al. Effects of person-centered care via telephone on self-efficacy in patients with chronic obstructive pulmonary disease: a subgroup analysis of a randomized controlled trial. *Nursing Open* 2020 doi: 10.1002/nop2.701
26. Wolf A, Fors A, Ulin K, et al. An eHealth Diary and Symptom-Tracking Tool Combined With Person-Centered Care for Improving Self-Efficacy After a Diagnosis of Acute

- 1  
2  
3 Coronary Syndrome: A Substudy of a Randomized Controlled Trial. *J Med Internet Res*  
4 2016;18(2):e40. doi: 10.2196/jmir.4890 [published Online First: 2016/02/26]  
5  
6 27. Wittenberg E, Goldsmith J, Parnell TA. Development of a communication and health  
7 literacy curriculum: Optimizing the informal cancer caregiver role. *Psychooncology*  
8 2020;29(4):766-74. doi: 10.1002/pon.5341 [published Online First: 2020/01/31]  
9  
10 28. Bernier MJ. Developing and evaluating printed education materials: a prescriptive model  
11 for quality. *Orthop Nurs* 1993;12(6):39-46. doi: 10.1097/00006416-199311000-00008  
12 [published Online First: 1993/11/01]  
13  
14 29. Hoffmann, Worrall L. Designing effective written health education materials:  
15 considerations for health professionals. *Disabil Rehabil* 2004;26(19):1166 - 73. doi:  
16 10.1080/09638280410001724816. [published Online First: 2004/09/17]  
17  
18 30. Swedish Government Official Reports SOU, (in Swedish). En nationell cancerstrategi för  
19 framtiden 11., 2009.  
20  
21 31. Pautasso FF, Zelmanowicz AM, Flores CD, et al. Role of the Nurse Navigator: integrative  
22 review. *Rev Gaucha Enferm* 2018;39:e20170102. doi: 10.1590/1983-1447.2018.2017-  
23 0102 [published Online First: 20180723]  
24  
25 32. Westman B, Ullgren H, Olofsson A, et al. Patient-reported perceptions of care after the  
26 introduction of a new advanced cancer nursing role in Sweden. *Eur J Oncol Nurs*  
27 2019;41:41-48. doi: 10.1016/j.ejon.2019.05.009 [published Online First: 20190601]  
28  
29 33. Hoffmann, Glasziou PP, Boutron I, et al. Better reporting of interventions: template for  
30 intervention description and replication (TIDieR) checklist and guide. *BMJ*  
31 2014;348:g1687. doi: 10.1136/bmj.g1687 [published Online First: 2014/03/13]  
32  
33 34. Eldridge SM, Chan CL, Campbell MJ, et al. CONSORT 2010 statement: extension to  
34 randomised pilot and feasibility trials. *Pilot Feasibility Stud* 2016;2:64. doi:  
35 10.1186/s40814-016-0105-8 [published Online First: 2016/12/15]  
36  
37 35. Moon, Moss-Morris., Hunter, et al. Acceptability and feasibility of a self-management  
38 intervention for women prescribed tamoxifen. *Health Education Journal* 2019;78(8)  
39 901 - 15. doi: 10.1177/0017896919853856  
40  
41 36. Sedgwick P. Before and after study designs. *BMJ* 2014;349:g5074. doi:  
42 10.1136/bmj.g5074 [published Online First: 2014/08/12]  
43  
44 37. Patient Act. SFS 2014:821(2014:82) Assessed 21-05-18.  
45  
46 38. Schober M, Lehwaldt D, Rogers M, et al. Guidelines on advanced practice nursing. 2020  
47  
48 39. Kerr H, Donovan M, McSorley O. Evaluation of the role of the clinical Nurse Specialist in  
49 cancer care: an integrative literature review. *Eur J Cancer Care (Engl)*  
50 2021;30(3):e13415. doi: 10.1111/ecc.13415 [published Online First: 20210126]  
51  
52 40. <http://www.1177.se>. Sjukdomar & besvär/Cancer/ Råd och stöd vid  
53 cancerKontaktsjuksköterskan – ditt stöd i vården vid cancer (21-07-21).  
54  
55 41. Granger BB, Britten N, Swedberg K, et al. Dumping adherence: a person-centred  
56 response for primary care. *Fam Pract* 2020;37(6):862 - 64. doi:  
57 10.1093/fampra/cmaa060. [published Online First: 2020/06/27]  
58  
59 42. Higgins A, Nicholl H. The experiences of lecturers and students in the use of  
60 microteaching as a teaching strategy. *Nurse Educ Pract* 2003;3(4):220-7. doi:  
10.1016/S1471-5953(02)00106-3 [published Online First: 2008/11/29]  
43. Remesh A. Microteaching, an efficient technique for learning effective teaching. *J Res  
Med Sci* 2013;18(2):158-63. [published Online First: 2013/08/06]



- 1  
2  
3 44. Ahlstedt Karlsson, Henoch I, Olofsson Bagge R, et al. An intervention mapping-based  
4 support program that empowers patients with endocrine therapy management,  
5 submitted.  
6
- 7 45. Dewey J. *Democracy and Education*. 2016
- 8 46. Ekman I. *Personcentrering inom hälso- och sjukvård. Från filosofi till praktik. Liber AB*  
9 2014
- 10 47. O'Neill GM, T. . STUDENT-CENTRED LEARNING: WHAT DOES IT MEAN FOR STUDENTS  
11 AND LECTURERS? . In: *Emerging Issues in the Practice of University Learning and*  
12 *Teaching* 2005
- 13 48. Lancaster GA, Dodd S, Williamson PR. Design and analysis of pilot studies:  
14 recommendations for good practice. *J Eval Clin Pract* 2004;10(2):307-12. doi:  
15 10.1111/j..2002.384.doc.x [published Online First: 2004/06/11]
- 16 49. Love J, Moore CD, Hensing G. Validation of the Swedish translation of the General Self-  
17 Efficacy scale. *Qual Life Res* 2012;21(7):1249-53. doi: 10.1007/s11136-011-0030-5  
18 [published Online First: 2011/10/11]
- 19 50. Thieme M, Eitenkel J, Zenger M, et al. Optimism, pessimism and self-efficacy in female  
20 cancer patients. *Jpn J Clin Oncol* 2017;47(9):849-55. doi: 10.1093/jjco/hyx079  
21 [published Online First: 2017/06/08]
- 22 51. Wilde B, Starrin B, Larsson G, et al. Quality of care from a patient perspective--a  
23 grounded theory study. *Scand J Caring Sci* 1993;7(2):113-20. doi: 10.1111/j.1471-  
24 6712.1993.tb00180.x [published Online First: 1993/01/01]
- 25 52. Wilde-Larsson B, Larsson G. Patients' views on quality of care and attitudes towards re-  
26 visiting providers. *Int J Health Care Qual Assur* 2009;22(6):600-11. doi:  
27 10.1108/09526860910986867 [published Online First: 2009/12/05]
- 28 53. Wallström SE, I; Taft, C. Svenskarnas syn på personcentrering i vården. *SOM-institutets*  
29 *sjuttonde forskarantologi (red Andersson, Ohlsson, Oscarsson och Oskarsson)* 2017
- 30 54. Wilde-Larsson B, Larsson G. Reviderat åtgärdsindex. Pm 2016:1. *Improveit Digital*  
31 *Solutions AB, Halmstad, Sweden* 2016
- 32 55. Portenoy RK, Thaler HT, Kornblith AB, et al. The Memorial Symptom Assessment Scale:  
33 an instrument for the evaluation of symptom prevalence, characteristics and distress.  
34 *Eur J Cancer* 1994;30A(9):1326-36. doi: 10.1016/0959-8049(94)90182-1 [published  
35 Online First: 1994/01/01]
- 36 56. Browall M, Kenne Sarenmalm E, Nasic S, et al. Validity and reliability of the Swedish  
37 version of the Memorial Symptom Assessment Scale (MSAS): an instrument for the  
38 evaluation of symptom prevalence, characteristics, and distress. *J Pain Symptom*  
39 *Manage* 2013;46(1):131-41. doi: 10.1016/j.jpainsymman.2012.07.023 [published  
40 Online First: 2012/12/01]
- 41 57. Julious SA. Sample size of 12 per group rule of thumb for a pilot study. *Pharmaceut*  
42 *Statist* 2005(4): 287-91. doi: 10.1002/pst.185
- 43 58. Thabane L, Lancaster G. A guide to the reporting of protocols of pilot and feasibility trials.  
44 *Pilot Feasibility Stud* 2019;5:37. doi: 10.1186/s40814-019-0423-8 [published Online  
45 First: 20190228]
- 46 59. Zelle DM, Kok T, Dontje ML, et al. The role of diet and physical activity in post-transplant  
47 weight gain after renal transplantation. *Clin Transplant* 2013;27(4):E484-90. doi:  
48 10.1111/ctr.12149 [published Online First: 20130613]
- 49 60. Eldridge SM, Lancaster GA, Campbell MJ, et al. Defining Feasibility and Pilot Studies in  
50 Preparation for Randomised Controlled Trials: Development of a Conceptual  
51  
52  
53  
54  
55  
56  
57  
58  
59  
60

- 1  
2  
3 Framework. *PLoS One* 2016;11(3):e0150205. doi: 10.1371/journal.pone.0150205  
4 [published Online First: 2016/03/16]  
5  
6 61. Eldridge SM, Ashby D, Feder GS, et al. Lessons for cluster randomized trials in the  
7 twenty-first century: a systematic review of trials in primary care. *Clin Trials*  
8 2004;1(1):80-90. doi: 10.1191/1740774504cn006rr [published Online First:  
9 2005/11/12]  
10  
11 62. Heiney SP, Parker PD, Felder TM, et al. A systematic review of interventions to improve  
12 adherence to endocrine therapy. *Breast Cancer Res Treat* 2019;173(3):499-510. doi:  
13 10.1007/s10549-018-5012-7 [published Online First: 2018/11/06]  
14  
15 63. Rowlands G, Sims J, Kerry S. A lesson learnt: the importance of modelling in randomized  
16 controlled trials for complex interventions in primary care. *Fam Pract*  
17 2005;22(1):132-9. doi: 10.1093/fampra/cmh704 [published Online First: 2005/01/11]  
18  
19 64. Plsek PE, Greenhalgh T. Complexity science: The challenge of complexity in health care.  
20 *BMJ* 2001;323(7313):625-8. doi: 10.1136/bmj.323.7313.625 [published Online First:  
21 2001/09/15]  
22  
23 65. Gunasekeran DV, Tham YC, Ting DSW, et al. Digital health during COVID-19: lessons from  
24 operationalising new models of care in ophthalmology. *Lancet Digit Health*  
25 2021;3(2):e124-e34. doi: 10.1016/S2589-7500(20)30287-9 [published Online First:  
26 2021/01/30]  
27  
28 66. Budd J, Miller BS, Manning EM, et al. Digital technologies in the public-health response  
29 to COVID-19. *Nat Med* 2020;26(8):1183-92. doi: 10.1038/s41591-020-1011-4  
30 [published Online First: 2020/08/10]  
31  
32 67. Vargo D, Lin, Z., Benwell, B., Zheng, Y. Digital technology use during COVID-19 pandemic:  
33 A rapid review. *Human Behavior and Emerging Technologies* 2021;3(1):13-24. doi:  
34 10.1002/hbe2.242  
35  
36 68. Ali L, Wallstrom S, Ekman I, et al. Effects of person-centred care via telephone on self-  
37 efficacy in patients with chronic obstructive pulmonary disease: Subgroup analysis of  
38 a randomized controlled trial. *Nurs Open* 2021;8(2):927-35. doi: 10.1002/nop2.701  
39 [published Online First: 2021/02/12]  
40  
41 69. Bostrom E, Ali L, Fors A, et al. Registered nurses' experiences of communication with  
42 patients when practising person-centred care over the phone: a qualitative interview  
43 study. *BMC Nurs* 2020;19:54. doi: 10.1186/s12912-020-00448-4 [published Online  
44 First: 2020/06/25]  
45  
46 70. Fors A, Ekman I, Taft C, et al. Person-centred care after acute coronary syndrome, from  
47 hospital to primary care - A randomised controlled trial. *Int J Cardiol* 2015;187:693-9.  
48 doi: 10.1016/j.ijcard.2015.03.336 [published Online First: 2015/04/29]  
49  
50 71. Fontein DB, Nortier JW, Liefers GJ, et al. High non-compliance in the use of letrozole after  
51 2.5 years of extended adjuvant endocrine therapy. Results from the IDEAL  
52 randomized trial. *Eur J Surg Oncol* 2012;38(2):110-7. doi: 10.1016/j.ejso.2011.11.010  
53 [published Online First: 2011/12/17]  
54  
55 72. Foster C, Breckons M, Cotterell P, et al. Cancer survivors' self-efficacy to self-manage in  
56 the year following primary treatment. *J Cancer Surviv* 2015;9(1):11-9. doi:  
57 10.1007/s11764-014-0384-0 [published Online First: 2014/07/17]  
58  
59 73. Sherer M, Maddux, J. E., Mercandante, B., Prentice-Dunn, S., Jacobs, B., & Rogers, R. W. .  
60 The self-efficacy scale: Construction and validation. . *Psychological reports*  
1982;51(2):663-71.

- 1  
2  
3 74. Lambert LK, Balneaves LG, Howard AF, et al. Understanding adjuvant endocrine therapy  
4 persistence in breast Cancer survivors. *BMC Cancer* 2018;18(1):732. doi:  
5 10.1186/s12885-018-4644-7 [published Online First: 2018/07/13]  
6  
7 75. World Medical Association. World Medical Association Declaration of Helsinki. Ethical  
8 principles for medical research involving human subjects. *Nurse Ethics* 2013;9(1):105  
9 - 09.  
10  
11  
12  
13  
14

15 Figure 1. Retention - CONSORT Flow diagram for the usual care group. Patients included September 2020 –  
16 December 2021.  
17

18  
19 Figure 2. Retention - CONSORT flow diagram for the person-centered support program group. Patients included  
20 December 2020 – March 2021.  
21

22  
23 Figure 3. The care and measurement chain for the control and intervention groups. Both groups received the  
24 content in the blue area (usual care).  
25 Abbreviations: Endocrine therapy – ET, Individual learning plan – ILP.  
26

27  
28 Figure 4. Baseline and 3-month difference measures in the control and intervention groups for self-efficacy and  
29 reported symptoms.  
30 Abbreviation: Number – no, Self-efficacy – SE.  
31  
32  
33  
34  
35  
36  
37  
38  
39  
40  
41  
42  
43  
44  
45  
46  
47  
48  
49  
50  
51  
52  
53  
54  
55  
56  
57  
58  
59  
60



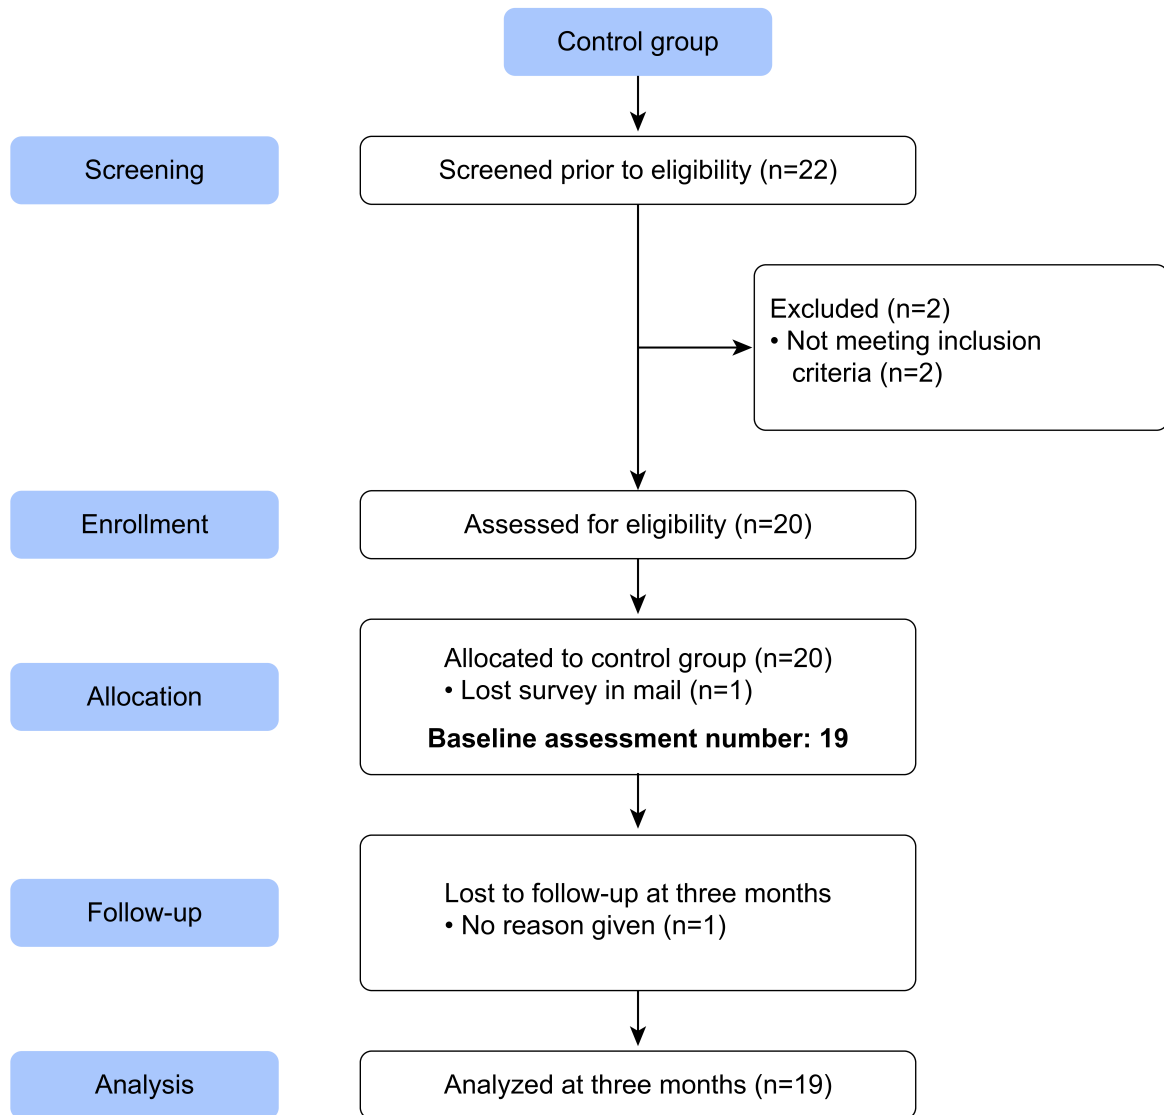

1  
2  
3  
4  
5  
6  
7  
8  
9  
10  
11  
12  
13  
14  
15  
16  
17  
18  
19  
20  
21  
22  
23  
24  
25  
26  
27  
28  
29  
30  
31  
32  
33  
34  
35  
36  
37  
38  
39  
40  
41  
42  
43  
44  
45  
46  
47  
48  
49  
50  
51  
52  
53  
54  
55  
56  
57  
58  
59  
60

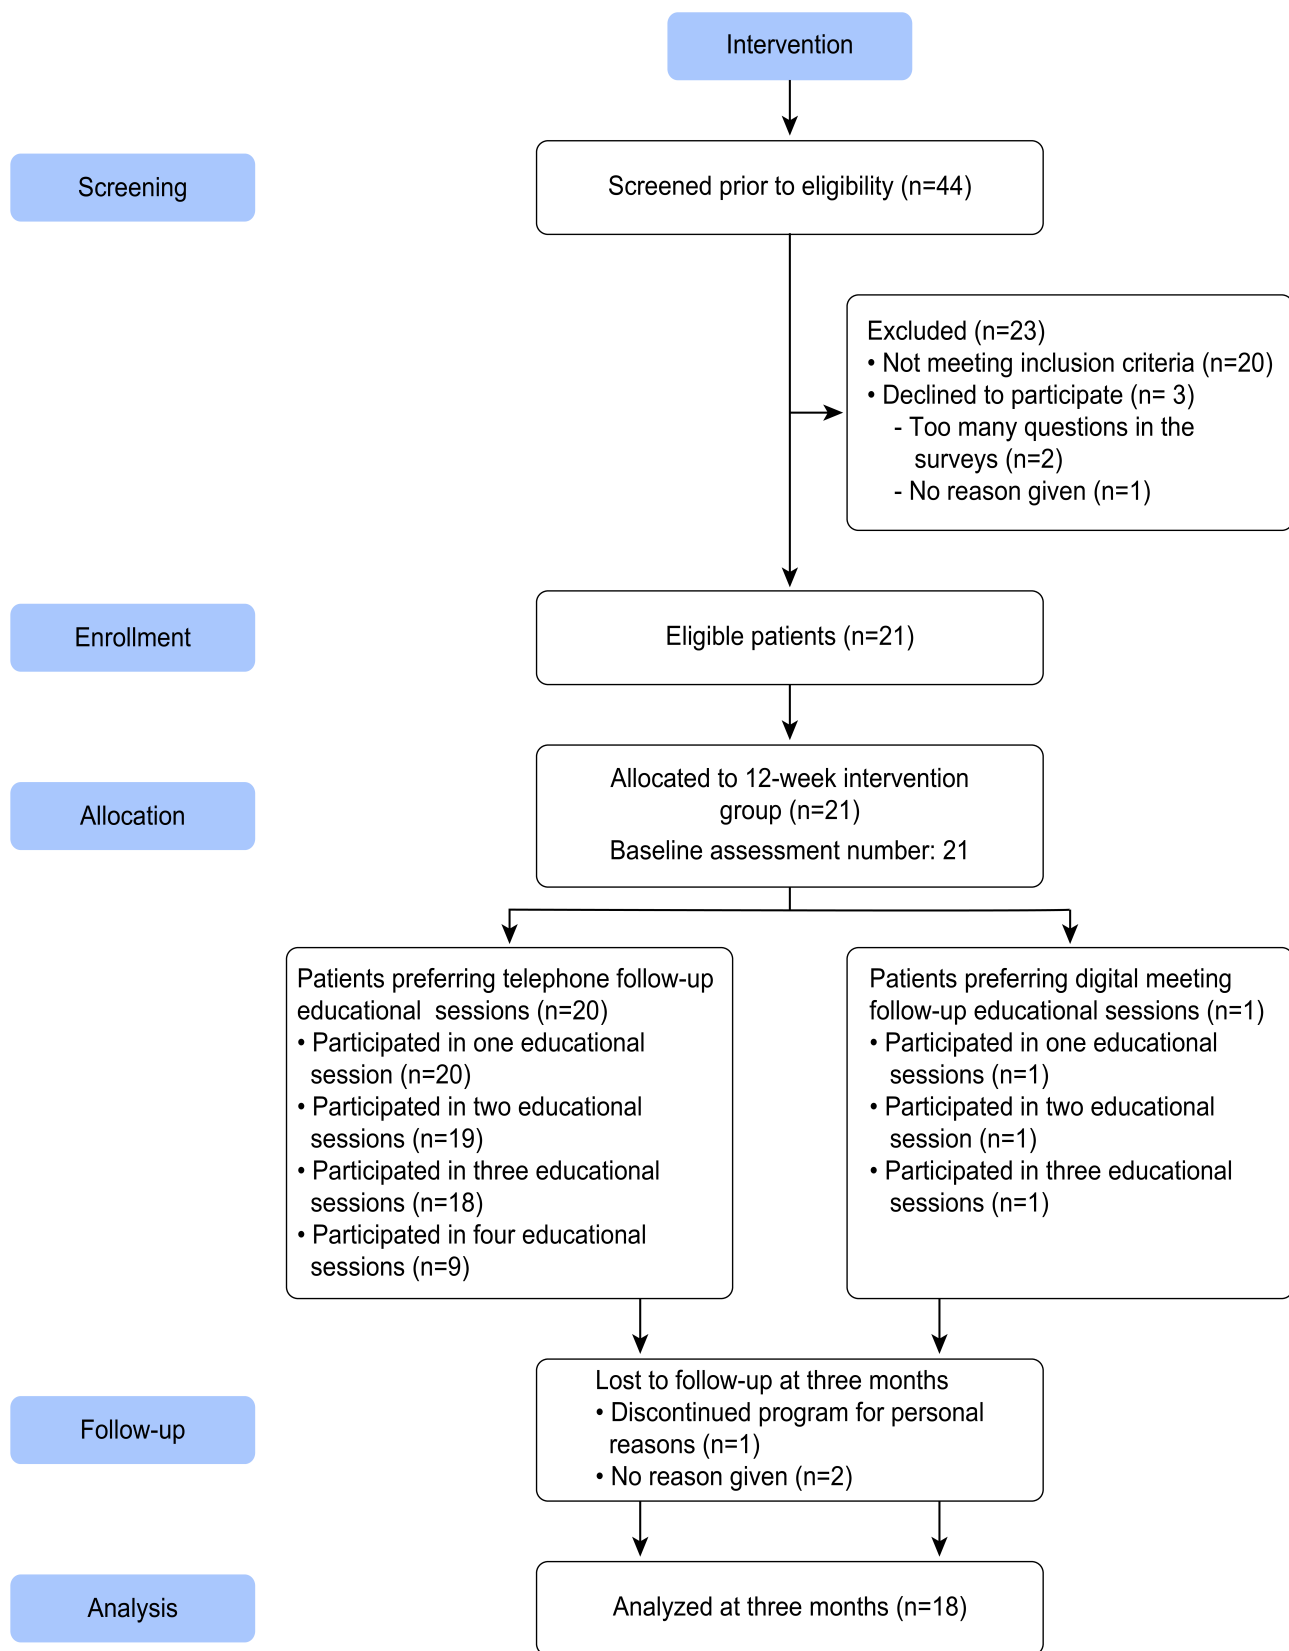

1  
2  
3  
4  
5  
6  
7  
8  
9  
10  
11  
12  
13  
14  
15  
16  
17  
18  
19  
20  
21  
22  
23  
24  
25  
26  
27  
28  
29  
30  
31  
32  
33  
34  
35  
36  
37  
38  
39  
40  
41  
42  
43  
44  
45  
46  
47  
48  
49  
50  
51  
52  
53  
54  
55  
56  
57  
58  
59  
60

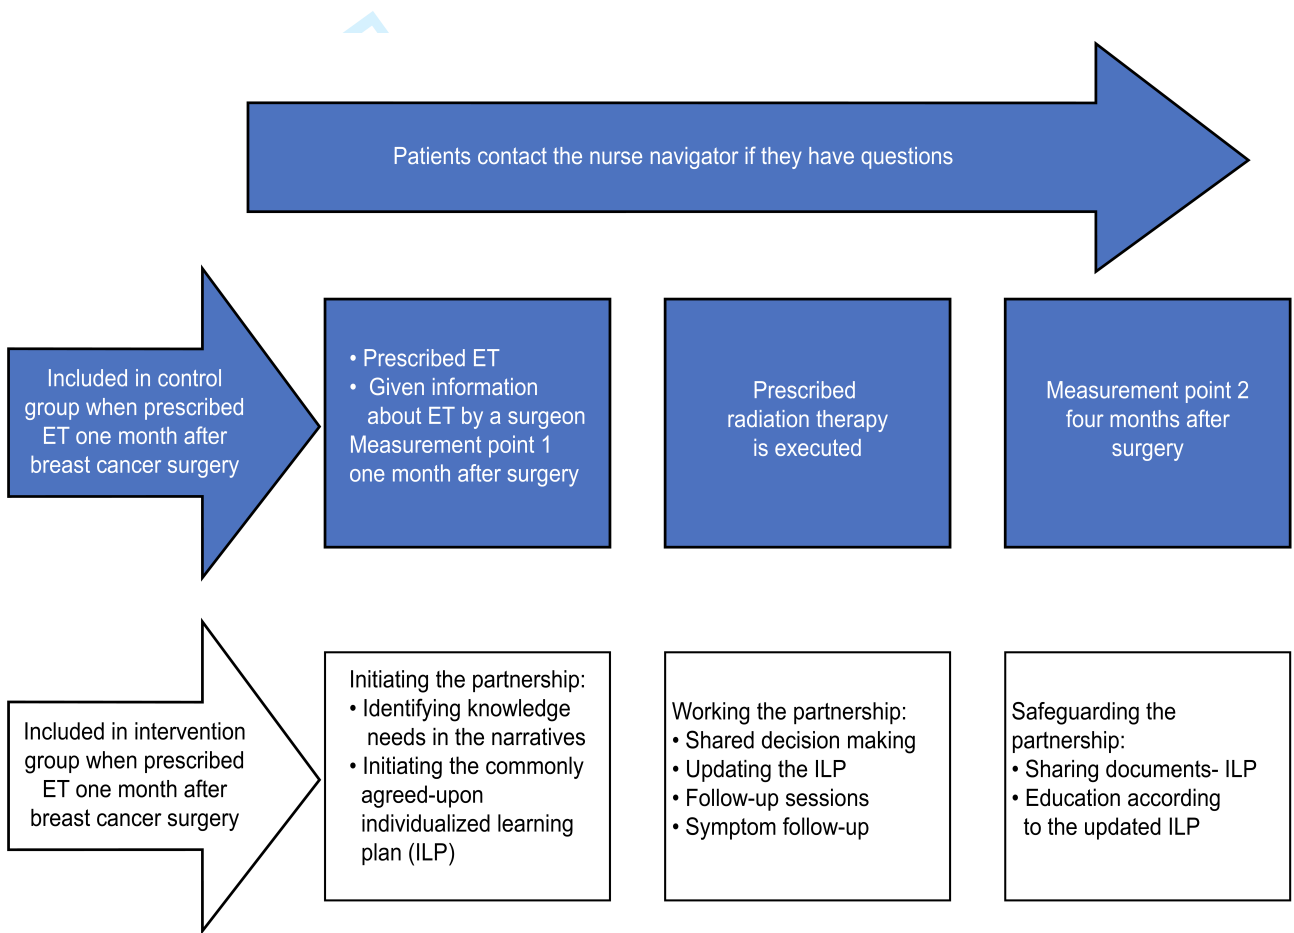

1  
2  
3  
4  
5  
6  
7  
8  
9  
10  
11  
12  
13  
14  
15  
16  
17  
18  
19  
20  
21  
22  
23  
24  
25  
26  
27  
28  
29  
30  
31  
32  
33  
34  
35  
36  
37  
38  
39  
40  
41  
42  
43  
44  
45  
46  
47  
48  
49  
50  
51  
52  
53  
54  
55  
56  
57  
58  
59  
60

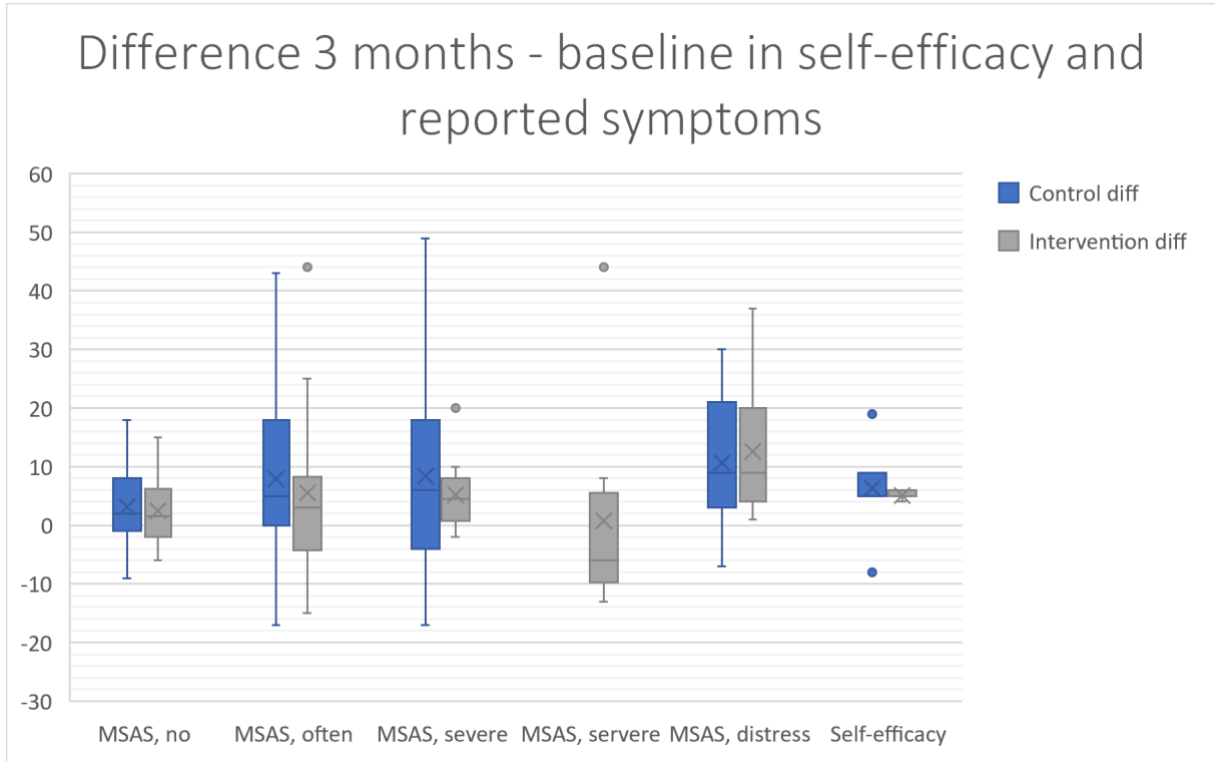

er review only

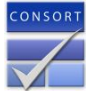

## CONSORT 2010 checklist of information to include when reporting a pilot or feasibility trial\*

| Section/Topic                    | Item No | Checklist item                                                                                                                                                                              | Reported on page No |
|----------------------------------|---------|---------------------------------------------------------------------------------------------------------------------------------------------------------------------------------------------|---------------------|
| <b>Title and abstract</b>        |         |                                                                                                                                                                                             |                     |
|                                  | 1a      | Identification as a pilot or feasibility randomised trial in the title                                                                                                                      | 1                   |
|                                  | 1b      | Structured summary of pilot trial design, methods, results, and conclusions (for specific guidance see CONSORT abstract extension for pilot trials)                                         | 1                   |
| <b>Introduction</b>              |         |                                                                                                                                                                                             |                     |
| Background and objectives        | 2a      | Scientific background and explanation of rationale for future definitive trial, and reasons for randomised pilot trial                                                                      | 4                   |
|                                  | 2b      | Specific objectives or research questions for pilot trial                                                                                                                                   | 5                   |
| <b>Methods</b>                   |         |                                                                                                                                                                                             |                     |
| Trial design                     | 3a      | Description of pilot trial design (such as parallel, factorial) including allocation ratio                                                                                                  | 5                   |
|                                  | 3b      | Important changes to methods after pilot trial commencement (such as eligibility criteria), with reasons                                                                                    | NA                  |
| Participants                     | 4a      | Eligibility criteria for participants                                                                                                                                                       | 6                   |
|                                  | 4b      | Settings and locations where the data were collected                                                                                                                                        | 6                   |
|                                  | 4c      | How participants were identified and consented                                                                                                                                              | 6                   |
| Interventions                    | 5       | The interventions for each group with sufficient details to allow replication, including how and when they were actually administered                                                       | 6-7                 |
| Outcomes                         | 6a      | Completely defined prespecified assessments or measurements to address each pilot trial objective specified in 2b, including how and when they were assessed                                | 8                   |
|                                  | 6b      | Any changes to pilot trial assessments or measurements after the pilot trial commenced, with reasons                                                                                        | NA                  |
|                                  | 6c      | If applicable, prespecified criteria used to judge whether, or how, to proceed with future definitive trial                                                                                 | 13-15               |
| Sample size                      | 7a      | Rationale for numbers in the pilot trial                                                                                                                                                    | 7                   |
|                                  | 7b      | When applicable, explanation of any interim analyses and stopping guidelines                                                                                                                | NA                  |
| Randomisation:                   |         |                                                                                                                                                                                             |                     |
| Sequence generation              | 8a      | Method used to generate the random allocation sequence                                                                                                                                      | NA                  |
|                                  | 8b      | Type of randomisation(s); details of any restriction (such as blocking and block size)                                                                                                      | NA                  |
| Allocation concealment mechanism | 9       | Mechanism used to implement the random allocation sequence (such as sequentially numbered containers), describing any steps taken to conceal the sequence until interventions were assigned | NA                  |

|                                                      |     |                                                                                                                                                                                       |                |
|------------------------------------------------------|-----|---------------------------------------------------------------------------------------------------------------------------------------------------------------------------------------|----------------|
| Implementation                                       | 10  | Who generated the random allocation sequence, who enrolled participants, and who assigned participants to interventions                                                               | 6              |
| Blinding                                             | 11a | If done, who was blinded after assignment to interventions (for example, participants, care providers, those assessing outcomes) and how                                              | NA             |
|                                                      | 11b | If relevant, description of the similarity of interventions                                                                                                                           | NA             |
| Statistical methods                                  | 12  | Methods used to address each pilot trial objective whether qualitative or quantitative                                                                                                | 11             |
| <b>Results</b>                                       |     |                                                                                                                                                                                       |                |
| Participant flow (a diagram is strongly recommended) | 13a | For each group, the numbers of participants who were approached and/or assessed for eligibility, randomly assigned, received intended treatment, and were assessed for each objective | 6              |
|                                                      | 13b | For each group, losses and exclusions after randomisation, together with reasons                                                                                                      | Figure 1 and 2 |
| Recruitment                                          | 14a | Dates defining the periods of recruitment and follow-up                                                                                                                               | 6              |
|                                                      | 14b | Why the pilot trial ended or was stopped                                                                                                                                              | NA             |
| Baseline data                                        | 15  | A table showing baseline demographic and clinical characteristics for each group                                                                                                      | Table 1        |
| Numbers analysed                                     | 16  | For each objective, number of participants (denominator) included in each analysis. If relevant, these numbers should be by randomised group                                          | Figure 1 and 2 |
| Outcomes and estimation                              | 17  | For each objective, results including expressions of uncertainty (such as 95% confidence interval) for any estimates. If relevant, these results should be by randomised group        | NA             |
| Ancillary analyses                                   | 18  | Results of any other analyses performed that could be used to inform the future definitive trial                                                                                      | 15             |
| Harms                                                | 19  | All important harms or unintended effects in each group (for specific guidance see CONSORT for harms)                                                                                 | NA             |
|                                                      | 19a | If relevant, other important unintended consequences                                                                                                                                  | NA             |
| <b>Discussion</b>                                    |     |                                                                                                                                                                                       |                |
| Limitations                                          | 20  | Pilot trial limitations, addressing sources of potential bias and remaining uncertainty about feasibility                                                                             | 19             |
| Generalisability                                     | 21  | Generalisability (applicability) of pilot trial methods and findings to future definitive trial and other studies                                                                     | 18             |
| Interpretation                                       | 22  | Interpretation consistent with pilot trial objectives and findings, balancing potential benefits and harms, and considering other relevant evidence                                   | 18             |
|                                                      | 22a | Implications for progression from pilot to future definitive trial, including any proposed amendments                                                                                 | 18             |
| <b>Other information</b>                             |     |                                                                                                                                                                                       |                |
| Registration                                         | 23  | Registration number for pilot trial and name of trial registry                                                                                                                        | NA             |
| Protocol                                             | 24  | Where the pilot trial protocol can be accessed, if available                                                                                                                          | NA             |
| Funding                                              | 25  | Sources of funding and other support (such as supply of drugs), role of funders                                                                                                       | 20             |
|                                                      | 26  | Ethical approval or approval by research review committee, confirmed with reference number                                                                                            | 20             |

1 Citation: Eldridge SM, Chan CL, Campbell MJ, Bond CM, Hopewell S, Thabane L, et al. CONSORT 2010 statement: extension to randomised pilot and feasibility trials. BMJ. 2016;355.

2 \*We strongly recommend reading this statement in conjunction with the CONSORT 2010, extension to randomised pilot and feasibility trials, Explanation and Elaboration for important  
3 clarifications on all the items. If relevant, we also recommend reading CONSORT extensions for cluster randomised trials, non-inferiority and equivalence trials, non-pharmacological  
4 treatments, herbal interventions, and pragmatic trials. Additional extensions are forthcoming: for those and for up to date references relevant to this checklist, see [www.consort-statement.org](http://www.consort-statement.org).  
5  
6  
7  
8  
9  
10  
11  
12  
13  
14  
15  
16  
17  
18  
19  
20  
21  
22  
23  
24  
25  
26  
27  
28  
29  
30  
31  
32  
33  
34  
35  
36  
37  
38  
39  
40  
41  
42

For peer review only

# BMJ Open

## A person-centered support program (RESPECT intervention) for women with breast cancer treated with endocrine therapy: A feasibility study

|                                 |                                                                                                                                                                                                                                                                                            |
|---------------------------------|--------------------------------------------------------------------------------------------------------------------------------------------------------------------------------------------------------------------------------------------------------------------------------------------|
| Journal:                        | <i>BMJ Open</i>                                                                                                                                                                                                                                                                            |
| Manuscript ID                   | bmjopen-2022-060946.R2                                                                                                                                                                                                                                                                     |
| Article Type:                   | Original research                                                                                                                                                                                                                                                                          |
| Date Submitted by the Author:   | 16-Aug-2022                                                                                                                                                                                                                                                                                |
| Complete List of Authors:       | Ahlstedt Karlsson, Susanne; Sahlgrenska Academy, Health Care Sciences<br>Henoch, Ingela; Goteborgs Universitet, Institute of health and care sciences<br>Olofsson Bagge, Roger; Sahlgrenska Academy, Clinical Sciences<br>Wallengren, Catarina ; Sahlgrenska Academy, Health Care Sciences |
| <b>Primary Subject Heading</b>: | Nursing                                                                                                                                                                                                                                                                                    |
| Secondary Subject Heading:      | Nursing, Oncology                                                                                                                                                                                                                                                                          |
| Keywords:                       | Breast tumours < ONCOLOGY, Quality in health care < HEALTH SERVICES ADMINISTRATION & MANAGEMENT, QUALITATIVE RESEARCH                                                                                                                                                                      |
|                                 |                                                                                                                                                                                                                                                                                            |

SCHOLARONE™  
Manuscripts





I, the Submitting Author has the right to grant and does grant on behalf of all authors of the Work (as defined in the below author licence), an exclusive licence and/or a non-exclusive licence for contributions from authors who are: i) UK Crown employees; ii) where BMJ has agreed a CC-BY licence shall apply, and/or iii) in accordance with the terms applicable for US Federal Government officers or employees acting as part of their official duties; on a worldwide, perpetual, irrevocable, royalty-free basis to BMJ Publishing Group Ltd ("BMJ") its licensees and where the relevant Journal is co-owned by BMJ to the co-owners of the Journal, to publish the Work in this journal and any other BMJ products and to exploit all rights, as set out in our [licence](#).

The Submitting Author accepts and understands that any supply made under these terms is made by BMJ to the Submitting Author unless you are acting as an employee on behalf of your employer or a postgraduate student of an affiliated institution which is paying any applicable article publishing charge ("APC") for Open Access articles. Where the Submitting Author wishes to make the Work available on an Open Access basis (and intends to pay the relevant APC), the terms of reuse of such Open Access shall be governed by a Creative Commons licence – details of these licences and which [Creative Commons](#) licence will apply to this Work are set out in our licence referred to above.

Other than as permitted in any relevant BMJ Author's Self Archiving Policies, I confirm this Work has not been accepted for publication elsewhere, is not being considered for publication elsewhere and does not duplicate material already published. I confirm all authors consent to publication of this Work and authorise the granting of this licence.

1  
2  
3  
4 **A person-centered support program (RESPECT intervention) for women with breast cancer**  
5  
6  
7 **treated with endocrine therapy: A feasibility study**  
8  
9  
10

11 Ahlstedt Karlsson, Susanne<sup>1,2</sup> Orcid ID: 0000-0001-5436-5476; Henoeh, Ingela<sup>2</sup> Orcid ID: 0000-0002-1987-  
12 5419; Olofsson Bagge, Roger<sup>1,3</sup> Orcid ID: 0000-0001-5795-0355; Wallengren, Catarina<sup>2</sup> Orcid ID: 0000-0002-  
13 8124-1572  
14  
15

16  
17  
18 <sup>1</sup>Department of Surgery, Sahlgrenska University Hospital, Gothenburg, Sweden.

19 <sup>2</sup>Institute of Health and Care Sciences, Sahlgrenska Academy at the University of Gothenburg, University of  
20 Gothenburg, Gothenburg, Sweden

21 <sup>3</sup>Department of Surgery, Institute of Clinical Sciences, Sahlgrenska Academy at the University of Gothenburg,  
22 Gothenburg, Sweden.  
23  
24

25  
26 # Correspondence to: Ahlstedt Karlsson, Institute of Health and Care Sciences, Sahlgrenska Academy at the  
27 University of Gothenburg, University of Gothenburg, Gothenburg, Sweden

28  
29 E-mail: susanne.ahlstedt.karlsson@gu.se

30 Telephone: +46 704153666  
31  
32  
33  
34  
35  
36

37  
38 Keywords: Breast cancer, endocrine therapy, intervention, feasibility, person-centered support program  
39  
40  
41

42 Wordcount: 5299  
43  
44  
45  
46  
47  
48  
49  
50  
51  
52  
53  
54  
55  
56  
57  
58  
59  
60

## ABSTRACT

**Objective:** The RESPECT intervention is considered to be a complex intervention due to the context. The aim of the study was to explore the feasibility of the trial design and patient acceptability of the intervention and outcome measures and to provide data to estimate the parameters required to design the final intervention.

**Design:** A controlled before-and-after design following the CONSORT 2010 statement for feasibility trials.

**Setting:** A surgical out-patient clinic in Sweden.

**Participants:** Forty-one patients (aged 47 – 85) with breast cancer and treated with endocrine therapy.

**Interventions:** Eligible patients were assigned to the control group or intervention group, which included individual education material, an individualized learning plan, and a personalized reminder letter using a person-centered approach. The intervention could be delivered as a telephone or digital follow-up during a 12 week follow up.

**Outcome measures:** The aims were to determine the recruitment rate, assess the rate of retention, explore whether the intervention was delivered according to the protocol, assess the preferred form of educational support, rate of education sessions, length per education session, and length between each education session, determine the distribution of education materials, and assess completion rates of patient-report instruments, including the General Self-efficacy Scale, the Quality of Care from the Patient's Perspective questionnaire, and the Memorial Symptom Assessment Scale.

**Results:** Eighty-six percent of the patients in the intervention group completed the intervention and completed the questionnaires three months after their inclusion. The call attendance was 90%. During the intervention, the contact nurse was compliant with the intervention protocol. For self-efficacy, symptoms, and quality of care, there were no differences in effect size between the control and intervention groups.

**Conclusions:** This intervention seems to be feasible and acceptable among patients, and a telephone follow-up intervention also seems to be the preferred way to administer the intervention.

## Article summary

### *Strengths and limitations of this study*

- This is the first study to investigate the feasibility of a person-centered support model for patients with breast cancer and treated with endocrine therapy.
- This study uses the CONSORT 2010 statement for feasibility trials.
- This study reports the recruitment rate, assess the rate of retention, explore whether the intervention was delivered according to the protocol, assess the preferred form of educational support, rate of education sessions, length per education session, and length between each education session, determine the distribution of education materials, and assess completion rates of patient-report instruments.
- Due to COVID-19 pandemic face-to-face sessions was restricted.

## BACKGROUND

For women diagnosed with hormone receptor-positive breast cancer, endocrine therapy (ET), i.e., the use of tamoxifen or aromatase inhibitors, is recommended for at least five years to reduce recurrence and rates of mortality<sup>1</sup>. A previous study reported that up to 91% of patients experience side effects from ET<sup>2</sup>, such as sleeping difficulties, hot flashes<sup>3,4</sup> and musculoskeletal symptoms<sup>5</sup>. Difficulties in managing these side effects have been reported to be obstacles to staying in treatment<sup>6</sup>. Other challenges that have been identified include older age<sup>7</sup>, medicine costs, or a general dislike of taking a regular medicine<sup>8</sup>. As ET is a long-lasting treatment, women may request support in managing challenges<sup>9</sup>. To manage challenges with ET, a partnership with health care professionals could be appropriate, as a previous study<sup>10</sup> identified that women with ET want to be able to manage their treatment but need guidance to do so.

Regarding the management of ET-related symptoms, previous studies have investigated the effect of symptom management interventions for patients prescribed ET<sup>11-13</sup>. A study identified management needs for ET symptoms, emotional needs, and needs for information acquisition and found that patients' relationship with health care providers was important<sup>12</sup>. A combination of information with cognitive behavioral therapy (CBT) to manage the side effects of tamoxifen showed successful results for the development of management skills in patients who were unable to stay in treatment<sup>11</sup>. Furthermore, training intervention with a physiotherapist or personal trainer followed by adapted training at home could be effective. However, a problem with this intervention was program adherence, as patients reported difficulty meeting the training goal in frequency and intensity due to other demands in life<sup>14</sup>. Also, training has not been found to have effect on musculoskeletal symptoms in patients treated with AIs<sup>15</sup>. Managing a disease and its additional challenges requires self-care knowledge and skills gained from a partnership with health care professionals<sup>16</sup>. Self-care involves the ability to both care for oneself and to achieve, promote and maintain optimal health<sup>17</sup>. A common feature of self-care and person-centered care (PCC) is an ability to view humans as the agent and the subject of action<sup>18,19</sup>. To include aspects of treatment important to the individual patient, such as different side effects, health care structures, fear of side effects, and lack of management skills and for support, a person-centered support program was developed<sup>10</sup>. As self-care requires knowledge and skills<sup>16</sup>, PCC could be appropriate for use in a support program. Self-care requisites are described as all elements that individuals need at all stages in life to care for themselves, i.e., air, food, water; self-care requisites also depend on how

1  
2  
3 individuals react to illness <sup>16</sup>. PCC can be a preferable way of identifying those requisites, as they can  
4 be identified in the narratives and used in the patient-health care provider partnership <sup>19</sup>. Patients are  
5 often motivated to engage in self-care, as they have personal interest in acquiring requisite knowledge  
6 and skills for performing self-care operations to reach their intended health goals <sup>16</sup>. It has been shown  
7 that when self-care capabilities increase <sup>20</sup>, self-efficacy and adherence to ET also increase <sup>21 22</sup>. Self-  
8 efficacy constitutes the self-image of the person and affects how people experience and behave in  
9 specific situations <sup>23</sup>. Previous studies using PCC have improved patients' self-efficacy <sup>24-26</sup>.

14  
15 It is important for patients to not only identify accurate information but also assess and integrate the  
16 information to gain increased knowledge, self-efficacy, and self-care skills <sup>10</sup>. Moreover, in addition to  
17 the emotional needs identified by Kim et al. (2020), it is important to assess the amount of needed  
18 information and to explore patients' understanding of the diagnosis and treatment <sup>27</sup>. For written health  
19 education materials to be effective, the patient must be able to apply the new information to her own  
20 life. This can be achieved by providing understandable examples and presenting the information so the  
21 patient sees its relevance to her situation <sup>28</sup>, as the ultimate reason for educating patients is to improve  
22 health <sup>29</sup>.

23  
24  
25 In Sweden all patients are allocated a contact nurse when being diagnosed with breast cancer. The  
26 contact nurse function as main point of contact during the patient's cancer treatments in order to reduce  
27 fragmented care and to strength patient involvement in care <sup>30</sup>. It has been suggested that contact  
28 nurses have a positive impact on care. Contact nurses aims to improve communication between patients  
29 and their health care professionals, as well as contact nurses are to improve the care process <sup>31</sup>. However,  
30 it has been reported that other factors seem to decrease contact nurses 'ability to provide the care they  
31 are meant to. Named reasons are challenges regarding the lack of information to patients, and lack of  
32 supportive care resources. Although the patients had a contact nurse, the patients reported how they  
33 lacked in the possibility to influence decisions about their care <sup>32</sup>.

34  
35  
36 A previous study developed a person-centered support program in collaboration among patients, health  
37 care professionals, researchers and managers with ET experience <sup>10</sup> and need to be tested in a feasibility  
38 study using the TIDieR checklist <sup>33</sup> and the CONSORT 2010 statement <sup>34</sup>. Previous studies have used  
39 feasibility studies prior to conducting a study in a larger setting <sup>9 35</sup>. The intervention was developed to  
40 encourage patients to be more actively involved in their care and wellbeing as partners with their contact  
41 nurse <sup>10</sup>. It has been stated that an intervention could be considered as complex due to behaviors required  
42 by those delivering the intervention <sup>36</sup>, i.e., a contact nurse. The complexity is caused by the context  
43 where the intervention are to be implemented in rather than the number of parts of the intervention <sup>37</sup>. It  
44 has been reported that complex interventions require engagements with the care context stakeholders,  
45 i.e., patients, and contact nurses, to be able to identify if the intervention could be acceptable, operable,  
46  
47  
48  
49  
50  
51  
52  
53  
54  
55  
56  
57  
58  
59  
60

1  
2  
3 cost effective, possible to scale up, and transferable across contexts. The development phases are  
4 identified including developing or use an existing complex intervention, feasibility, evaluation, and  
5 implementation <sup>38</sup>.  
6  
7  
8  
9  
10  
11  
12

### 13 **Aim**

14 In this feasibility trial, the aim was to explore the feasibility of the study design and the patient  
15 acceptability of the peRson-cEntred Support Program EndoCrine Therapy (RESPECT) intervention and  
16 outcome measures and to provide data to estimate the parameters required to design the final  
17 intervention.  
18  
19  
20  
21  
22

### 23 **METHODS**

#### 24 *Study design*

25 This was a feasibility trial using a controlled before-and-after design <sup>39</sup> to investigate the feasibility of  
26 the intervention, a person-centered support program aimed at empowering patients prescribed ET to  
27 manage ET-related symptoms and problems.  
28  
29  
30  
31  
32

#### 33 *Patient and public involvement*

34 Patients and health care professionals was involved in the design and development of the person-  
35 centered support model <sup>10</sup>. However, there was no patient involvement in the evaluation of the person-  
36 centered support model presented in this study.  
37  
38  
39  
40

#### 41 *Participants*

42 Between September 2020 and June 2021, 66 potential female patients from one outpatient clinic at one  
43 university hospital in Sweden were identified as eligible for inclusion when starting ET. The inclusion  
44 criteria were women > 18 years who had been diagnosed with breast cancer and treated with ET after  
45 surgery. Patients receiving adjuvant chemotherapy were excluded as the study aimed to investigate an  
46 intervention targeting patients treated with ET. All patients were contacted by a contact nurse and  
47 were invited by telephone to participate in the study approximately three weeks after their surgery  
48 when being prescribed ET (Table 1). In the online supplementary materials, the CONSORT flow  
49 diagram for the usual care group and person-centered support program group is available  
50 (Supplementary file 1 and 2).  
51  
52  
53  
54  
55  
56  
57  
58  
59  
60



All patients were given verbal and written information about the study, and after agreeing to have an informed consent form sent to them by mail, they all provided written, informed consent. If the patient agreed to participate, she sent the informed consent form back using a prepaid envelope.

Table 1. Demographic and clinical characteristics of the participants in the control group (n=20) and intervention group (n=21) in the RESPECT project.

| <b>Demographic characteristics</b>    | <b>Control group n=20</b> | <b>Intervention group n=21</b> |
|---------------------------------------|---------------------------|--------------------------------|
| <i>Median age, years (range)</i>      | 65 (50-85)                | 66 (47-79)                     |
| <i>Civil status, n (%)</i>            |                           |                                |
| <i>Married/cohabiting</i>             | 12 (63%)                  | 16 (76%)                       |
| <i>Single</i>                         | 8 (37%)                   | 5 (23%)                        |
| <i>Ancestral homeland, n (%)</i>      |                           |                                |
| <i>Sweden</i>                         | 16 (80%)                  | 18 (86%)                       |
| <i>Scandinavian countries</i>         | 1 (5%)                    | 1 (5%)                         |
| <i>Europe</i>                         | 1 (5%)                    | 2 (10%)                        |
| <i>Outside Europe</i>                 | 1 (5%)                    | 0 (0%)                         |
| <i>Education, n (%)</i>               |                           |                                |
| <i>University</i>                     | 9 (45%)                   | 10 (48%)                       |
| <i>High school</i>                    | 8 (40%)                   | 8 (38%)                        |
| <i>Elementary school</i>              | 3 (15%)                   | 3 (14%)                        |
| <i>Radiation therapy, n (%)</i>       | 16 (80%)                  | 21 (100%)                      |
| <i>Tumor size, median mm (range)</i>  | 14 (4-45)                 | 12 (1-19)                      |
| <i>Breast surgery</i>                 |                           |                                |
| <i>Mastectomy</i>                     | 4 (20%)                   | 2 (10%)                        |
| <i>Partial mastectomy</i>             | 15 (75%)                  | 19 (90%)                       |
| <i>Axillary lymph node dissection</i> | 1 (0.5%)                  | 0 (0%)                         |
| <i>Tamoxifen, n (%)</i>               | 9 (45%)                   | 9 (43%)                        |
| <i>Aromatase inhibitor, n (%)</i>     | 11 (55%)                  | 12 (57)                        |

#### *Control group*

Usual care (UC) involves patients being allocated a contact nurse (an experienced undergraduate nurse or postgraduate nurse in surgical care), as the Swedish Patient Act <sup>40</sup> gives patients a statutory right to permanent contact with health care. Internationally the role is called Clinical Nurse Specialist <sup>41</sup>, and are identified to be a valuable recourse in cancer care <sup>42</sup>.

Patients can contact the contact nurse all weekdays by telephone or by using a national digital tool, 1177.se <sup>43</sup>. All patients receive written information as a brochure or a digital "My care and rehabilitation

1  
2  
3 plan” when diagnosed with breast cancer. Support in usual care aims to give patients information about  
4 their state of health, available methods for examinations, care, and treatments, as well as information  
5 about at which time point she can expect to receive care and a permanent contact with the health care.  
6 The contact nurse writes down the information that is available before surgery, such as tumor  
7 characteristics and surgery preparations. The patient can also write down questions to bring to the  
8 oncoming appointments. Usual care is based on patients’ initiative to make contact.  
9  
10  
11  
12  
13  
14  
15  
16

### 17 *Intervention group*

18  
19 The intervention was provided in a surgical outpatient clinic in western Sweden from December 2020-  
20 June 2021. The goal of the intervention is to empower patients prescribed ET to manage ET-related  
21 symptoms and problems. In addition to the UC, a 12-week intervention was offered to the participants  
22 in the intervention group as described in a previous study <sup>10</sup>. Figure 1 shows the care and measurement  
23 chain for the control and intervention groups.  
24  
25  
26  
27

### 28 *Step 1- Individual education material*

29  
30 Using a PCC approach <sup>19</sup>, the contact nurse listened to patients narratives regarding their individual  
31 needs for knowledge and understanding, resources, goals and needs for support from the contact nurse.  
32 The timing of supplying individual educational materials depended on the individual patient’s needs,  
33 resources and goals during the 12-week intervention. Mutual trust was demonstrated, and the  
34 relationship between the patient and her contact nurse was reinforced through the assessment of the  
35 commonly agreed-upon individualized learning plan <sup>44</sup> study.  
36  
37  
38  
39

### 40 *Step 2 - An individualized learning plan (ILP)*

41  
42 An ILP was established depending on the individual patients’ needs for knowledge and understanding  
43 about ET and considering the patients’ resources, goals, and needs for education material and support  
44 from the contact nurse. In combination with the individual educational materials (step 1), a follow-up  
45 plan was made using telephone and/or digital follow-ups. Physical follow-ups were minimized as the  
46 COVID-19 pandemic was ongoing. The number of follow-up sessions and whether relatives were to be  
47 included during the 12-week intervention were agreed upon between the patient and the contact nurse.  
48 Patients could also refuse all education material and other materials and only use only the contact nurse  
49 for support.  
50  
51  
52  
53  
54  
55

### 56 *Step 3 – A personalized reminder letter*

57  
58 The third part of the support program was a personalized reminder letter after three months including  
59 contact information and an invitation for patients to make contact if needed.  
60

1  
2  
3  
4  
5  
6 **Please insert Figure 1 about here**  
7  
8

9 *Education of the intervention nurse*

10 The aim of the education was to increase the intervention nurse's knowledge and understanding of ET,  
11 its problems and symptom management using PCC. Microteaching<sup>45 46</sup> sessions and seminars were  
12 used; the microteaching sessions were adapted to the specific needs of knowledge about endocrine  
13 therapy, side effects<sup>47</sup>, pedagogy<sup>48</sup> and PCC<sup>19 49</sup>, and the chosen approach was intended to help the  
14 contact nurse take responsibility for her own learning, i.e., student-centered learning<sup>50</sup>. Additionally,  
15 practical exercises were used, as the contact nurse was able to practice her knowledge and understanding  
16 in a care setting and reflect on it, and the intervention nurse's curiosity was used as a motivator to gain  
17 knowledge<sup>48</sup>. A full description of the education of the intervention nurse is reported in the online  
18 supplementary materials (Supplementary file 3).  
19  
20  
21  
22  
23  
24  
25

26 *Data collection*

27 Data were collected from September 2020 – June 2021. Feasibility outcomes were collected during the  
28 whole study period by the intervention nurse and were documented directly after every session in a trial  
29 log to secure the data collection<sup>51</sup>. The trial log contained a summary of the results of the feasibility  
30 criteria using Excel (Microsoft® Excel, version 16.50).  
31  
32  
33  
34

35 The three questionnaires were distributed by mail to patients in the control group (between September  
36 2020 and December 2020) and the intervention group (December 2020 and March 2021). These three  
37 questionnaires were distributed at baseline, i.e., at the start of the intervention and ET, and three months  
38 after the start of the intervention.  
39  
40  
41

42 The first questionnaire was the GSE, a 10-item (short form) psychometric scale that assesses optimistic  
43 self-beliefs to cope with a variety of demands in life. The GSE is a validated instrument that has been  
44 translated into Swedish<sup>52</sup> and has previously been used with breast cancer patients<sup>53</sup>. The total score is  
45 the mean value of respondents' answer to all items. High scores imply higher self-efficacy.  
46  
47  
48  
49

50 The second questionnaire was the QPP, a 45-item instrument that measures satisfaction in four  
51 dimensions: medical-technical competence, physical-technical conditions, identity-oriented approach,  
52 and sociocultural atmosphere<sup>54 55</sup>. Moreover, to identify patients' views of whether the health care was  
53 adapted to their needs rather than health care routines, three items (*I was given the possibility to tell the*  
54 *medical staff how I experienced my situation; I was given the opportunity to participate in the planning*  
55 *of my care/treatment; I received the information I needed to be able to participate in decisions about*  
56 *my own care and treatment*) that were previously used by the Swedish SOM institute were added<sup>56</sup>. To  
57  
58  
59  
60

1  
2  
3 calculate the execution index, each question is scored in terms of actual experience and subjective  
4 importance, each on a four-point Likert scale. The execution index score ranges from 1–7, where one is  
5 inadequate quality of care from the patient perspective and seven is good quality of care <sup>57</sup>.  
6  
7

8  
9 The last questionnaire was the MSAS, a 32-question instrument for patients to rate their symptoms on  
10 a 5-point Likert scale <sup>58 59</sup>. The instrument has been validated in Swedish breast cancer patients <sup>59</sup> and  
11 has previously been used with breast cancer patients <sup>53</sup>. The total MSAS score is the average of the  
12 symptom scores for all 32 symptoms. Each symptom score is an average of the dimensions and includes  
13 the number of symptoms, how often patients experienced them, the severity of the symptoms and the  
14 cause of distress.  
15  
16  
17

### 18 19 *Feasibility outcomes*

20  
21 In this study, feasibility outcomes are defined as primary outcome. Craig et al. (2013) described several  
22 challenging variables that can affect an intervention's results and conclusions. The feasibility  
23 classification (process, resources, scientific) and feasibility criteria reported by Thabane et al. (2019)  
24 and Lancaster et al. (2004) were used to collect feasibility data. Based on the recommendations for  
25 feasibility studies and an expected attrition rate of 20%, the sample size was set to 20 participants in  
26 each group <sup>60</sup>. To determine whether the chosen feasibility criteria were successful <sup>61</sup>, criteria for  
27 success were stated according to the CONSORT 2010 statement <sup>34</sup>;  
28  
29  
30  
31

32  
33 The intervention process was assessed with the feasibility criteria as follows:

- 34  
35 1. Recruitment was studied to determine whether the patients were willing to participate in the  
36 study. It has been suggesting that the loss of participants should be less than 15% <sup>62</sup>. The  
37 criterion was determined to be successful if the percentage rates of recruitment were > 70%.  
38
- 39  
40 2. Retention was studied to determine whether the patients were willing to remain for the entire  
41 study period, i.e., 12 weeks. The criterion was determined to be successful if the percentage  
42 rates of retention were >70%.  
43
- 44  
45 3. Compliance with the intervention protocol was studied to determine if the patients were offered  
46 the three parts of the planned intervention, i.e., education materials, learning plan and  
47 personalized letter. The criterion was determined to be successful if all three parts of the  
48 intervention were offered.  
49  
50  
51

52  
53 The resources used in the intervention were assessed with the feasibility criteria as follows:

- 54  
55 4. Form of educational support was studied to determine the preferred form of educational support  
56 during the intervention period, i.e., 12 weeks. The criterion was determined to be successful if  
57 one of the three forms of educational support (face-to face, telephone, and digital) were  
58 requested by the patients.  
59  
60

5. Number of educational sessions was studied to determine how many educational opportunities the patient used during the intervention period, i.e., 12 weeks. The criterion determined to be successful if no more than four education sessions were used by each patient.
6. Length per education session was studied to determine how much time the patient used in each education session. The criterion was determined to be successful if < 45 minutes was used per education session. The time was clocked by the intervention nurse.
7. Length between each education session was studied to determine how often women wanted to have education opportunities. The criterion was determined to be successful if there were no more than four weeks between each education session.
8. Distribution of education materials was studied to determine how much of intervention materials the patients received during the study. The criterion was determined to be successful if the distribution of education materials was >70%.

The scientific challenges of the intervention were assessed with the feasibility criteria as follows:

9. Completion rate of questionnaires was studied to determine if the patient was willing to answer the questionnaires, i.e., at baseline and 12 weeks. The criterion was determined to be successful if the percentage rates of patient completion of questionnaires were > 70% at baseline and 12 weeks.
10. The estimated treatment effect was studied to determine if the selected instruments were appropriate to measure patients' self-efficacy, quality of care, and symptoms. The criterion was determined to be successful if there were any changes in the self-report measures between the first and second points of measurement.

Patients included in the study responded to the questionnaires and returned the questionnaires in a prepaid envelope.

### **Analysis**

To analyze demographic variables, we used descriptive statistics (number, percent, mean, range). We calculated the percentage rates of recruitment, retention, and completion of questionnaires. We calculated the number, median and range of educational sessions, distribution of education materials, length per education session, and length between each education session. As the study was a feasibility test, no hypothesis testing was applied<sup>63</sup>, but p-values were calculated and presented to value their relevance in an forthcoming RCT. Descriptive statistical analyses and the Mann-Whitney U-test were performed to identify the experience of symptoms, satisfaction with care and perceived self-efficacy. P-values below .05 were considered statistically significant, and all analyses were performed with IBM® SPSS® Statistics version 27 (IBM SPSS Statistics for Macintosh, Version 27.0).

## RESULTS

### *Participant demographics*

In the control group, the median age was 65 years, 80% of the participants were born in Sweden, 63% were cohabiting and 45% were prescribed tamoxifen. In the intervention group, the median age was 66 years, 86% were born in Sweden, 76% were cohabiting and 43% were prescribed tamoxifen (Table 1).

### *Feasibility classification and criteria*

Feasibility outcomes are presented in line with the CONSORT 2010 statement as follows:

#### *1. Recruitment*

In the control group, 22 eligible patients were screened, and 20 were approached at the clinic, of whom 20 consented to participate (100%). In the intervention group, 44 patients were screened, of whom 24 were approached and 21 consented to participate (88%) (Table 1), and patients was enrolled from December 2020 – April 2021. Of the three patients who did not consent to participate in the intervention group, two indicated the number of questions in the questionnaires to be a reason for not participating. One patient gave no reason for not participating.

#### *2. Retention*

In the intervention group, 20 patients completed (95%). One patient dropped out from the intervention because the study reminded her about the breast cancer surgery, which she was trying to forget about.

#### *3. Compliance with the intervention protocol*

In the first session, the patients' needs for knowledge and understanding, resources, goals and support from the contact nurse were identified in their narratives. Education material was offered accordingly using a written agreement between the patient and contact nurse and documented in the ILP. Patients decided with the contact nurse whether they required knowledge. If they required knowledge, they stated when they wanted the education materials and which parts. Their need for knowledge ranged between having everything sent after the first session and having some of the education material sent at the end of the intervention. Patients could state that they did not want any education material at the start of the intervention but would reevaluate their needs during the 12 weeks of the intervention. However, since the ILP was sent home with the patients, any changes in the plan had to be documented by the patient herself. Two patients received the education materials sent to them but did not want to read it, just to have it if they wanted to read it later. Seven patients did not want the intervention for the full 12-week period (33%) but stated that they would make contact if they needed further information during the intervention. One patient wanted her partner to be included. Two patients in the intervention group did not answer the telephone at the scheduled session, making the call attendance 90%. One patient rescheduled a session due to personal reasons. Thirty-three percent of the patients did not want follow-up sessions during the full 12-week intervention. As 90% of the patients wanted all educational

1  
2  
3 materials, 10% of the patients used only the contact nurse for support and one hundred percent of the  
4 patients received a personalized reminder letter (Table 2).

5  
6 Contact information and an invitation for patients (100%) to make contact if needed were sent after 12  
7 weeks in the personalized letter. None of the patients made contact after the 12-week intervention as  
8 shown in Table 2.  
9  
10  
11  
12  
13

#### 14 *4. Resources*

15  
16 None of the patients wanted to have face-to-face sessions as educational support. In fact, several of the  
17 patients stated that it was important to not have to come for appointments at the hospital. Reasons for  
18 not wanting to come to the hospital were related to the COVID-19 pandemic as well as to perceptions  
19 of appointments at the hospital being time consuming. All patients but one preferred telephone sessions.  
20 If a patient had asked for a face-to-face follow-up session, this would have been managed accordingly,  
21 with arrangements made to ensure safety in the context of the COVID-19 pandemic. Face-to-face  
22 meetings at the hospital with patients were not prohibited but restricted. However, no patient-contact  
23 nurse pairs participated in a face-to-face session; had they done so, both the patient and the contact nurse  
24 would have had to wear face masks, and the contact nurse would have also had to wear a plastic face  
25 shield to prevent transmission of the COVID-19 virus.  
26  
27  
28  
29  
30

#### 31 *5. Number of educational sessions*

32  
33 The number of educational sessions ranged between two and four sessions (Table 2).

#### 34 *6. Length per education session*

35  
36 Telephone support sessions ranged between 5 and 60 minutes, and digital support sessions ranged  
37 between 30 and 45 minutes (Table 2) and was clocked by the intervention nurse.

#### 38 *7. Length between education sessions*

39  
40 The length between follow-up sessions ranged between 1 and 6 weeks (Table 2).

#### 41 *8. Distribution of education materials*

42  
43 All patients (100%) wanted part 1 of the individual education material. Further description of the  
44 distribution is shown in Table 2.  
45  
46

#### 47 *9. Completion rate of questionnaires*



In the control group, 95% completed the first questionnaires at baseline, as one patient questionnaire was lost in the mail. At three months, 95% of patients responded to their surveys. In the intervention group, 100% responded to the first questionnaires, and 86% responded to the follow-up questionnaires after three months. At the first measurement point, two reminder messages were sent to three patients in the intervention group before one patient was recorded as a drop out. At the second measurement point, one reminder message was sent to six patients three weeks after the questionnaires were sent. A second reminder message was sent approximately two weeks later to five patients, and as two patients did not return their questionnaires, they were recorded as drop-outs. Two patients in the intervention group did not answer the telephone at the scheduled session, making the call attendance 90%. One patient rescheduled a session due to personal reasons.

#### 10. Estimated treatment effect

Differences between the control and intervention groups in perceived self-efficacy (0.5 and 0,  $p=0.731$ ) and reported number of symptoms according to the MSAS (2 and 1,  $p=0.724$ ) after 3 months were observed (Figure 2). Median differences at baseline and 3 months in the control group and intervention group is also reported in the online supplementary materials (Supplementary file 4).

Quality of care was measured using QPP, and these results in shown in the online supplementary materials (Supplementary file 5). Overall, the patients in the control group had higher quality of care index scores than patients in the intervention group.

Table 2. Resource needs for the intervention

| <b>RESPECT</b>                                                                                   |            |
|--------------------------------------------------------------------------------------------------|------------|
| <b>Distributed educational material</b>                                                          |            |
| Individual educational material <i>Part 1, n</i>                                                 | 21         |
| Individual educational material <i>Part 2, n</i>                                                 | 20         |
| Individual educational material <i>Part 3, n</i>                                                 | 19         |
| Individual educational material <i>Part 4, n</i>                                                 | 19         |
| Individual educational material<br><i>Information about tamoxifen or aromatase inhibitors, n</i> | 20         |
| Additional educational material from the patient needs:                                          |            |
| Complementary medicine, n                                                                        | 1          |
| Sleep advice, n                                                                                  | 1          |
| Recommendations about internet sites:                                                            |            |
| Sleep advice, n                                                                                  | 2          |
| <b>Form of education and educational sessions per patient</b>                                    |            |
| Face to face (n=0), median (range)                                                               | 0 (-)      |
| Telephone (n=20), median (range)                                                                 | 3 (2-4)    |
| Digital (n=1), median (range)                                                                    | 1 (1)      |
| <b>Length (minutes) per sessions</b>                                                             |            |
| Telephone (n=20), median (range)                                                                 | 20 (5-60)  |
| Digital (n=1), median (range)                                                                    | 30 (30-45) |



| <b>Length of time (weeks) between each session</b>                                  |         |
|-------------------------------------------------------------------------------------|---------|
| Telephone follow-up education sessions, weeks, median (range)                       | 4 (1-6) |
| Digital meeting follow-up sessions, weeks, median (range)                           | 4 (-)   |
| <i>Follow-up educational session</i>                                                |         |
| Time from 1 <sup>st</sup> session to 2 <sup>nd</sup> session, weeks, median (range) | 2 (1-8) |
| Time from 2 <sup>nd</sup> session to 3 <sup>rd</sup> session, weeks, median (range) | 4 (2-8) |
| Time from 3 <sup>rd</sup> session to 4 <sup>th</sup> session, weeks, median (range) | 4 (2-5) |

**Please insert Figure 2 about here**

## DISCUSSION

The results show that the intervention was feasible regarding the classification process and resources. However, it was less feasible regarding scientific challenges. The recruitment methods used seem to be accurate and feasible for an RCT with the aim of empowering patients prescribed ET to manage ET-related symptoms and problems. As a before-and-after design was used, the risk of contamination between groups was minor, as the intervention nurse had minor clinical contact with the control group.

The most common problems reported by trial investigators have been identified as a lack of adherence to the trial protocol, difficulties with recruitment, data collection and the intervention itself<sup>64</sup>; however, during the intervention, the contact nurse succeeded in adhering to the trial protocol. Moreover, a weakness in interventions has been reported to be a lack of theoretical approach<sup>65</sup>; to address this challenge, the presented study was founded on a theoretical model<sup>47</sup>. Modeling was used to identify pit falls and barriers<sup>66</sup>. The contact nurse in the intervention pretested the intervention protocol in clinical meetings with patients before launching the support program. It is crucial for health care professionals to have deep insight into the theory and selected methods to increase patients' required knowledge about ET since no one will adhere to a protocol if the protocol is of no significance<sup>48</sup>. Moreover, a health care context is referred to as a complex adaptive system, as it contains a collection of individuals with the freedom to act in a way that is not always predictable and changes depending on the context. Moreover, a complex adaptive system has fuzzy boundaries, and health care professionals' priorities depend on, for example, their private lives and things they would not sacrifice to follow a study protocol<sup>67</sup>. These challenges need to be addressed, as the intervention is to be applied in a care setting.

Furthermore, as the follow up is flexible and the patients decided, in a partnership with the contact nurse, how many educational sessions were required, the patient's individuality and resources were a focus, and no patient needed to acquire education than necessary. This needed flexibility is another component making the intervention a complex intervention. Moreover, the COVID-19 pandemic has increased the use of digital follow-up, which seems to be well liked among patients<sup>68-70</sup>. Furthermore, face-to-face

1  
2  
3 sessions were not prohibited during the intervention but were restricted due to the COVID-19 pandemic.  
4 If a patient would have asked for a face-to-face session, this would have been managed to not put the  
5 patient, fellow patients, or the contact nurse or other health care professionals in danger. However, we  
6 cannot specifically state that patients would prefer telephone sessions under other circumstances, but  
7 telephone follow-up seems to be suitable, as patients indicated physical appointments to be time  
8 consuming. A previous study also used telephone follow-up to increase confidence in controlling illness  
9 in patients with chronic obstructive pulmonary disease with positive results in controlling symptoms  
10 ( $p=.028$ )<sup>71</sup>, and telephone follow-ups found to be well liked among registered nurses<sup>72</sup>. A previous  
11 study using PCC also allowed patients to decide the number of follow-up sessions<sup>73</sup>. Thus, this approach  
12 could be a preferable way to administer the intervention and could also be more cost-effective, as  
13 patients do not need to attend more sessions than required; however, it needs to be evaluated further.  
14 Furthermore, all health care professionals do not have a PCC approach, which might affect the responses  
15 in the questionnaires and the interpretation of the results. To manage this, the whole care chain needs to  
16 structure their work according to PCC, as in a previous study<sup>24</sup>.

17  
18  
19  
20  
21  
22  
23  
24  
25  
26 Moreover, the intervention protocol ranged over 12 weeks, as this period has been identified as the most  
27 troublesome for patients with ET<sup>74</sup>, and a previous study identified that the start of the ET period could  
28 be preferable for an intervention<sup>35</sup>. As 67% of the patients wanted education during the full 12-week  
29 intervention, 12 weeks is indicated to be a suitable length for a support program in a future RCT.  
30 However, an optional follow-up session after six months, when the patients have more experience with  
31 ET, could be appropriate, but measures would need to be taken to help patients stay focused on ET when  
32 responding to the questionnaires. A later session could also be preferable for patients who do not want  
33 to be educated during the first months undergoing ET<sup>35</sup>.

34  
35  
36  
37  
38  
39  
40 To address scientific challenges, two measurement points were used, baseline and three months after  
41 being prescribed ET. In an RCT, additional measurement points could be added at six and 12 months.  
42 However, there were no differences in self-efficacy between the control and intervention groups; rather,  
43 both the control group and the intervention had high self-efficacy scores at baseline, indicating that the  
44 ceiling level was reached. Higher education implies higher self-efficacy<sup>75</sup> ( $p=.017$ )<sup>76</sup>. In the present  
45 study, 45% of the patients in the control group and 48% of the patients in the intervention group had  
46 university education, indicating that the GES may not be suitable as an instrument. General self-efficacy  
47 has been increased using PCC in a previous study in patients with acute coronary syndrome<sup>73</sup>, indicating  
48 that breast cancer patients could also benefit from PCC. This is of importance, as low self-efficacy has  
49 been identified as a predictor of terminating ET prematurely<sup>77</sup> due to beliefs about its low influence on  
50 health or low satisfaction with involvement in health care<sup>77</sup>.

51  
52  
53  
54  
55  
56  
57  
58  
59 The study had some limitations. As the COVID-19 pandemic was ongoing, there were restrictions on  
60 the patients' ability to have face-to-face sessions with the trial leader. However, several patients stated

1  
2  
3 that they would participate only if there were no mandatory sessions at the hospital. The patients also  
4 had the possibility of having their sessions using a digital conference system. As the intervention contact  
5 nurse and the participants almost never met in person, their relationships could have been affected.  
6  
7 However, a partnership was established between the patient and the trial leader using a PCC protocol.  
8  
9 This might have decreased the effect of not meeting in person. In a future RCT, it will be crucial for  
10 patients to have face-to-face relationships with the intervention contact nurse with whom they will build  
11 partnerships. This study did not identify when the intervention should stop, as it was decided before the  
12 intervention that it should last for 12 weeks. It might have been important for the patients in the  
13 intervention to have given this important information. However, seven of the 21 patients did not use the  
14 full 12-week intervention, which implies that a 12-week support program is suitable. No patient actively  
15 asked for longer follow up. All patients were allocated a contact nurse whom they could contact after  
16 the intervention if further questions were answered.  
17  
18  
19  
20  
21  
22

### 23 **Conclusion**

24 This intervention seems to be feasible regarding its process and resources and acceptable among  
25 patients, as 95% completed the 12-week support program and 86% responded to the three-month  
26 questionnaire. A telephone follow-up intervention seems to be the preferable way to administer the  
27 intervention. However, for self-efficacy and symptoms, there were no differences in effect size between  
28 the control and intervention groups, indicating that the intervention was less feasible regarding scientific  
29 challenges.  
30  
31  
32  
33

### 34 *Ethical approval*

35  
36 Patients were informed that their participation was voluntary and could be terminated at any time  
37 without consequences. They were also assured that their confidentiality would be respected throughout  
38 the research process. This study was approved by the Swedish Ethical Review Authority (approval no  
39 2020-03239).  
40  
41  
42  
43  
44

### 45 *Conflicts of Interest*

46 The authors report no conflicts of interest.  
47  
48  
49

### 50 *Contributorship statement*

51 IH, SAK, ROB, CW: Conceptualizing and design, IH, SAK, CW: Methodology, SAK: Data  
52 Collection, IH, SAK, CW, ROB, Formal Analysis: IH, SAK, CW, ROB: Visualization, IH, SAK, CW,  
53 ROB: Writing-review and editing.  
54  
55  
56

### 57 *Availability statement*

58 Data are available upon reasonable request.  
59  
60

### Source of Funding

Susanne Ahlstedt Karlsson has received honoraria from R&D Council in Gothenburg and Bohuslän (VGFOUGSB-932984). Ingela Henoeh is currently receiving a grant from the Bröstcancerförbundet, grant number N/As. For the remaining authors none were declared. The authors have no conflicts of interest to disclose.

### Acknowledgments

We thank all patients for sharing their personal experiences of life with ET. We would also like to thank the staff of the surgical outpatient care unit for contributing to finding eligible patients to include in the study.

### References

1. Davies C, Godwin J, Gray R, et al. Relevance of breast cancer hormone receptors and other factors to the efficacy of adjuvant tamoxifen: patient-level meta-analysis of randomised trials. *Lancet* 2011;378(9793):771-84. doi: 10.1016/S0140-6736(11)60993-8
2. Berkowitz MJ, Thompson, C. K., Zibecchi. L.T., Lee, M.K., Streja, E., Berkowitz. J.S., Wenziger. C. M, Bake. J.L., Di Nome. M.L., Attai. D.J. How patients experience endocrine therapy for breast cancer: an online survey of side effects, adherence, and medical team support. *Journal of Cancer Survivorship* 2020;15:29–39. doi: 10.1007/s11764-020-00908-5.
3. Ahlstedt Karlsson, Wallengren C, Olofsson Bagge R, et al. Women's coping strategies during the first three months of adjuvant endocrine therapy for breast cancer. *Nurs Open* 2019;7(2):605 - 12. doi: 10.1002/nop2.430. [published Online First: 2020/02/25]
4. Moon, Hunter MS, Moss-Morris R, et al. Factors related to the experience of menopausal symptoms in women prescribed tamoxifen. *J Psychosom Obstet Gynaecol* 2017;38(3):226 - 35. doi: 10.1080/0167482X.2016.1216963. [published Online First: 2016/09/02]
5. Nabieva N, Fehm T, Haberle L, et al. Influence of side-effects on early therapy persistence with letrozole in post-menopausal patients with early breast cancer: Results of the prospective EvAluate-TM study. *Eur J Cancer* 2018;96:82 - 90. doi: 10.1016/j.ejca.2018.03.020. [published Online First: 2018/04/22]

- 1  
2  
3 6. Bluethmann SM, Murphy CC, Tiro JA, et al. Deconstructing decisions to initiate, maintain,  
4 or discontinue adjuvant endocrine therapy in breast cancer survivors: A mixed-  
5 methods study. . *Oncol Nurs Forum* 2017;**44**(3):E101–E10. doi: 10.1188/17.ONF.E101-  
6 E110. [published Online First: 2017/06/22]
- 7  
8 7. Cavazza M, Banks H, Ercolanoni M, et al. Factors influencing adherence to adjuvant  
9 endocrine therapy in breast cancer-treated women: using real-world data to inform a  
10 switch from acute to chronic disease management. *Breast Cancer Res Treat*  
11 2020;183:189–99. doi: 10.1007/s10549-020-05748-6. [published Online First:  
12 2020/06/28]
- 13  
14 8. Shinn EH, Broderick G, Fellman B, et al. Simulating time-dependent patterns of  
15 nonadherence by patients with breast cancer to adjuvant oral endocrine therapy. .  
16 *JCO Clin Cancer Inform* 2019;3:1 - 9. doi: 10.1200/CCI.18.00091. [published Online  
17 First: 2019/04/20]
- 18  
19 9. Di Meglio A, Soldato D, Presti D, et al. Lifestyle and quality of life in patients with early-  
20 stage breast cancer receiving adjuvant endocrine therapy. *Curr Opin Oncol* 2021 doi:  
21 10.1097/CCO.0000000000000781 [published Online First: 2021/08/31]
- 22  
23 10. Ahlstedt Karlsson S, Henoch I, Olofsson Bagge R, et al. An intervention mapping-based  
24 support program that empowers patients with endocrine therapy management.  
25 *Evaluation and Program Planning* 2022:102071. doi:  
26 <https://doi.org/10.1016/j.evalprogplan.2022.102071>
- 27  
28 11. Moon, Moss-Morris R, Hunter MS, et al. Development of a self-management  
29 intervention to improve tamoxifen adherence in breast cancer survivors using an  
30 Intervention Mapping framework. *Support Care Cancer* 2020 doi: 10.1007/s00520-  
31 020-05850-x. [published Online First: 2020/10/30]
- 32  
33 12. Kim SH, Park S, Kim SJ, et al. Self-management Needs of Breast Cancer Survivors After  
34 Treatment: Results From a Focus Group Interview. *Cancer Nurs* 2020;43(1):78-85.  
35 doi: 10.1097/NCC.0000000000000641. [published Online First: 2018/08/28]
- 36  
37 13. Shelby RA, Dorfman CS, Bosworth HB, et al. Testing a behavioral intervention to improve  
38 adherence to adjuvant endocrine therapy (AET). *Contemp Clin Trials* 2019;76:120-31.  
39 doi: 10.1016/j.cct.2018.11.010 [published Online First: 2018/11/26]
- 40  
41 14. Duijts SF, van Beurden M, Oldenburg HS, et al. Efficacy of cognitive behavioral therapy  
42 and physical exercise in alleviating treatment-induced menopausal symptoms in  
43 patients with breast cancer: results of a randomized, controlled, multicenter trial. *J*  
44 *Clin Oncol* 2012;30(33):4124-33. doi: 10.1200/JCO.2012.41.8525 [published Online  
45 First: 2012/10/10]
- 46  
47 15. Roberts KE, Rickett K, Feng S, et al. Exercise therapies for preventing or treating  
48 aromatase inhibitor-induced musculoskeletal symptoms in early breast cancer.  
49 *Cochrane Database Syst Rev* 2020;1:CD012988. doi:  
50 10.1002/14651858.CD012988.pub2 [published Online First: 2020/01/30]
- 51  
52 16. McLaughlin Renpenning KT, S, G. Self-Care Theory in Nursing. Selected Papers of Dorothea  
53 Orem. *New York Springer Publishing Company* 2003
- 54  
55 17. Richard AA, Shea K. Delineation of self-care and associated concepts. *J Nurs Scholarsh*  
56 2011;43(3):255-64. doi: 10.1111/j.1547-5069.2011.01404.x [published Online First:  
57 2011/09/03]
- 58  
59 18. Denyes MJ, Orem DE, Bekel G, et al. Self-care: a foundational science. *Nurs Sci Q*  
60 2001;14(1):48-54. doi: 10.1177/089431840101400113 [published Online First:  
2002/03/05]

19. Ekman I, Swedberg K, Taft C, et al. Person-centered care--ready for prime time. *Eur J Cardiovasc Nurs* 2011;10(4):248-51. doi: 10.1016/j.ejcnurse.2011.06.008. [published Online First: 2011/07/19]
20. Bag E, Mollaoglu M. The evaluation of self-care and self-efficacy in patients undergoing hemodialysis. *J Eval Clin Pract* 2010;16(3):605-10. doi: 10.1111/j.1365-2753.2009.01214.x [published Online First: 2009/10/31]
21. Toivonen KI, Williamson TM, Carlson LE, et al. Potentially Modifiable Factors Associated with Adherence to Adjuvant Endocrine Therapy among Breast Cancer Survivors: A Systematic Review. *Cancers (Basel)* 2020;13(1) doi: 10.3390/cancers13010107 [published Online First: 2021/02/10]
22. Moon, Moss-Morris R, Hunter MS, et al. Barriers and facilitators of adjuvant hormone therapy adherence and persistence in women with breast cancer: a systematic review. *Patient Prefer Adherence* 2017;11:305-22. doi: 10.2147/PPA.S126651 [published Online First: 2017/03/07]
23. Bandura A. Self-efficacy. The exercise of control. *WH Freeman New York* 1997
24. Fors A, Taft C, Ulin K, et al. Person-centred care improves self-efficacy to control symptoms after acute coronary syndrome: a randomized controlled trial. *Eur J Cardiovasc Nurs* 2016;15(2):186-94. doi: 10.1177/1474515115623437 [published Online First: 2015/12/25]
25. Ali L, Wallstrom S, Ekman I, et al. Effects of person-centered care via telephone on self-efficacy in patients with chronic obstructive pulmonary disease: a subgroup analysis of a randomized controlled trial. *Nursing Open* 2020 doi: 10.1002/nop2.701
26. Wolf A, Fors A, Ulin K, et al. An eHealth Diary and Symptom-Tracking Tool Combined With Person-Centered Care for Improving Self-Efficacy After a Diagnosis of Acute Coronary Syndrome: A Substudy of a Randomized Controlled Trial. *J Med Internet Res* 2016;18(2):e40. doi: 10.2196/jmir.4890 [published Online First: 2016/02/26]
27. Wittenberg E, Goldsmith J, Parnell TA. Development of a communication and health literacy curriculum: Optimizing the informal cancer caregiver role. *Psychooncology* 2020;29(4):766-74. doi: 10.1002/pon.5341 [published Online First: 2020/01/31]
28. Bernier MJ. Developing and evaluating printed education materials: a prescriptive model for quality. *Orthop Nurs* 1993;12(6):39-46. doi: 10.1097/00006416-199311000-00008 [published Online First: 1993/11/01]
29. Hoffmann, Worrall L. Designing effective written health education materials: considerations for health professionals. *Disabil Rehabil* 2004;26(19):1166 - 73. doi: 10.1080/09638280410001724816. [published Online First: 2004/09/17]
30. Swedish Government Official Reports SOU, (in Swedish). En nationell cancerstrategi för framtiden 11., 2009.
31. Pautasso FF, Zelmanowicz AM, Flores CD, et al. Role of the Nurse Navigator: integrative review. *Rev Gaucha Enferm* 2018;39:e20170102. doi: 10.1590/1983-1447.2018.2017-0102 [published Online First: 20180723]
32. Westman B, Ullgren H, Olofsson A, et al. Patient-reported perceptions of care after the introduction of a new advanced cancer nursing role in Sweden. *Eur J Oncol Nurs* 2019;41:41-48. doi: 10.1016/j.ejon.2019.05.009 [published Online First: 20190601]
33. Hoffmann, Glasziou PP, Boutron I, et al. Better reporting of interventions: template for intervention description and replication (TIDieR) checklist and guide. *BMJ* 2014;348:g1687. doi: 10.1136/bmj.g1687 [published Online First: 2014/03/13]



- 1
  - 2
  - 3
  - 4
  - 5
  - 6
  - 7
  - 8
  - 9
  - 10
  - 11
  - 12
  - 13
  - 14
  - 15
  - 16
  - 17
  - 18
  - 19
  - 20
  - 21
  - 22
  - 23
  - 24
  - 25
  - 26
  - 27
  - 28
  - 29
  - 30
  - 31
  - 32
  - 33
  - 34
  - 35
  - 36
  - 37
  - 38
  - 39
  - 40
  - 41
  - 42
  - 43
  - 44
  - 45
  - 46
  - 47
  - 48
  - 49
  - 50
  - 51
  - 52
  - 53
  - 54
  - 55
  - 56
  - 57
  - 58
  - 59
  - 60
34. Eldridge SM, Chan CL, Campbell MJ, et al. CONSORT 2010 statement: extension to randomised pilot and feasibility trials. *Pilot Feasibility Stud* 2016;2:64. doi: 10.1186/s40814-016-0105-8 [published Online First: 2016/12/15]
35. Moon, Moss-Morris., Hunter, et al. Acceptability and feasibility of a self-management intervention for women prescribed tamoxifen. *Health Education Journal* 2019;78(8) 901 - 15. doi: 10.1177/0017896919853856
36. Craig P, Dieppe P, Macintyre S, et al. Developing and evaluating complex interventions: the new Medical Research Council guidance. *Int J Nurs Stud* 2013;50(5):587 - 92. doi: 10.1016/j.ijnurstu.2012.09.010. [published Online First: 2012/11/20]
37. Moore GF, Evans RE, Hawkins J, et al. From complex social interventions to interventions in complex social systems: Future directions and unresolved questions for intervention development and evaluation. *Evaluation (Lond)* 2019;25(1):23-45. doi: 10.1177/1356389018803219 [published Online First: 20181031]
38. Skivington K, Matthews L, Simpson SA, et al. A new framework for developing and evaluating complex interventions: update of Medical Research Council guidance. *BMJ* 2021;374:n2061. doi: 10.1136/bmj.n2061 [published Online First: 20210930]
39. Sedgwick P. Before and after study designs. *BMJ* 2014;349:g5074. doi: 10.1136/bmj.g5074 [published Online First: 2014/08/12]
40. Patient Act. SFS 2014:821(2014:82) Assessed 21-05-18.
41. Schober M, Lehwaldt D, Rogers M, et al. Guidelines on advanced practice nursing. 2020
42. Kerr H, Donovan M, McSorley O. Evaluation of the role of the clinical Nurse Specialist in cancer care: an integrative literature review. *Eur J Cancer Care (Engl)* 2021;30(3):e13415. doi: 10.1111/ecc.13415 [published Online First: 20210126]
43. <http://www.1177.se>. Sjukdomar & besvär/Cancer/ Råd och stöd vid cancerKontaktsjuksköterskan – ditt stöd i vården vid cancer (21-07-21).
44. Granger BB, Britten N, Swedberg K, et al. Dumping adherence: a person-centred response for primary care. *Fam Pract* 2020;37(6):862 - 64. doi: 10.1093/fampra/cmaa060. [published Online First: 2020/06/27]
45. Higgins A, Nicholl H. The experiences of lecturers and students in the use of microteaching as a teaching strategy. *Nurse Educ Pract* 2003;3(4):220-7. doi: 10.1016/S1471-5953(02)00106-3 [published Online First: 2008/11/29]
46. Remesh A. Microteaching, an efficient technique for learning effective teaching. *J Res Med Sci* 2013;18(2):158-63. [published Online First: 2013/08/06]
47. Ahlstedt Karlsson, Henoeh I, Olofsson Bagge R, et al. An intervention mapping-based support program that empowers patients with endocrine therapy management, submitted.
48. Dewey J. *Democracy and Education*. 2016
49. Ekman I. *Personcentrering inom hälso- och sjukvård. Från filosofi till praktik*. Liber AB 2014
50. O'Neill GM, T. . STUDENT-CENTRED LEARNING: WHAT DOES IT MEAN FOR STUDENTS AND LECTURERS? . In: *Emerging Issues in the Practice of University Learning and Teaching* 2005
51. Lancaster GA, Dodd S, Williamson PR. Design and analysis of pilot studies: recommendations for good practice. *J Eval Clin Pract* 2004;10(2):307-12. doi: 10.1111/j..2002.384.doc.x [published Online First: 2004/06/11]

- 1
- 2
- 3
- 4 52. Love J, Moore CD, Hensing G. Validation of the Swedish translation of the General Self-
- 5 Efficacy scale. *Qual Life Res* 2012;21(7):1249-53. doi: 10.1007/s11136-011-0030-5
- 6 [published Online First: 2011/10/11]
- 7 53. Thieme M, Einenkel J, Zenger M, et al. Optimism, pessimism and self-efficacy in female
- 8 cancer patients. *Jpn J Clin Oncol* 2017;47(9):849-55. doi: 10.1093/jjco/hyx079
- 9 [published Online First: 2017/06/08]
- 10 54. Wilde B, Starrin B, Larsson G, et al. Quality of care from a patient perspective--a
- 11 grounded theory study. *Scand J Caring Sci* 1993;7(2):113-20. doi: 10.1111/j.1471-
- 12 6712.1993.tb00180.x [published Online First: 1993/01/01]
- 13 55. Wilde-Larsson B, Larsson G. Patients' views on quality of care and attitudes towards re-
- 14 visiting providers. *Int J Health Care Qual Assur* 2009;22(6):600-11. doi:
- 15 10.1108/09526860910986867 [published Online First: 2009/12/05]
- 16 56. Wallström SE, I; Taft,C. Svenskarnas syn på personcentrering i vården. *SOM-institutets*
- 17 *sjuttonde forskarantologi (red Andersson, Ohlsson, Oscarsson och Oskarsson)* 2017
- 18 57. Wilde-Larsson B, Larsson G. Reviderat åtgärdsindex. Pm 2016:1. *Improveit Digital*
- 19 *Solutions AB, Halmstad, Sweden* 2016
- 20 58. Portenoy RK, Thaler HT, Kornblith AB, et al. The Memorial Symptom Assessment Scale:
- 21 an instrument for the evaluation of symptom prevalence, characteristics and distress.
- 22 *Eur J Cancer* 1994;30A(9):1326-36. doi: 10.1016/0959-8049(94)90182-1 [published
- 23 Online First: 1994/01/01]
- 24 59. Browall M, Kenne Sarenmalm E, Nasic S, et al. Validity and reliability of the Swedish
- 25 version of the Memorial Symptom Assessment Scale (MSAS): an instrument for the
- 26 evaluation of symptom prevalence, characteristics, and distress. *J Pain Symptom*
- 27 *Manage* 2013;46(1):131-41. doi: 10.1016/j.jpainsymman.2012.07.023 [published
- 28 Online First: 2012/12/01]
- 29 60. Julious SA. Sample size of 12 per group rule of thumb for a pilot study. *Pharmaceut*
- 30 *Statist* 2005(4): 287-91. doi: 10.1002/pst.185
- 31 61. Thabane L, Lancaster G. A guide to the reporting of protocols of pilot and feasibility trials.
- 32 *Pilot Feasibility Stud* 2019;5:37. doi: 10.1186/s40814-019-0423-8 [published Online
- 33 First: 20190228]
- 34 62. Zelle DM, Kok T, Dontje ML, et al. The role of diet and physical activity in post-transplant
- 35 weight gain after renal transplantation. *Clin Transplant* 2013;27(4):E484-90. doi:
- 36 10.1111/ctr.12149 [published Online First: 20130613]
- 37 63. Eldridge SM, Lancaster GA, Campbell MJ, et al. Defining Feasibility and Pilot Studies in
- 38 Preparation for Randomised Controlled Trials: Development of a Conceptual
- 39 Framework. *PLoS One* 2016;11(3):e0150205. doi: 10.1371/journal.pone.0150205
- 40 [published Online First: 2016/03/16]
- 41 64. Eldridge SM, Ashby D, Feder GS, et al. Lessons for cluster randomized trials in the
- 42 twenty-first century: a systematic review of trials in primary care. *Clin Trials*
- 43 2004;1(1):80-90. doi: 10.1191/1740774504cn006rr [published Online First:
- 44 2005/11/12]
- 45 65. Heiney SP, Parker PD, Felder TM, et al. A systematic review of interventions to improve
- 46 adherence to endocrine therapy. *Breast Cancer Res Treat* 2019;173(3):499-510. doi:
- 47 10.1007/s10549-018-5012-7 [published Online First: 2018/11/06]
- 48 66. Rowlands G, Sims J, Kerry S. A lesson learnt: the importance of modelling in randomized
- 49 controlled trials for complex interventions in primary care. *Fam Pract*
- 50 2005;22(1):132-9. doi: 10.1093/fampra/cmh704 [published Online First: 2005/01/11]
- 51
- 52
- 53
- 54
- 55
- 56
- 57
- 58
- 59
- 60



- 1  
2  
3 67. Plsek PE, Greenhalgh T. Complexity science: The challenge of complexity in health care.  
4 *BMJ* 2001;323(7313):625-8. doi: 10.1136/bmj.323.7313.625 [published Online First:  
5 2001/09/15]  
6  
7 68. Gunasekeran DV, Tham YC, Ting DSW, et al. Digital health during COVID-19: lessons from  
8 operationalising new models of care in ophthalmology. *Lancet Digit Health*  
9 2021;3(2):e124-e34. doi: 10.1016/S2589-7500(20)30287-9 [published Online First:  
10 2021/01/30]  
11  
12 69. Budd J, Miller BS, Manning EM, et al. Digital technologies in the public-health response  
13 to COVID-19. *Nat Med* 2020;26(8):1183-92. doi: 10.1038/s41591-020-1011-4  
14 [published Online First: 2020/08/10]  
15  
16 70. Vargo D, Lin, Z., Benwell, B., Zheng, Y. Digital technology use during COVID-19 pandemic:  
17 A rapid review. *Human Behavior and Emerging Technologies* 2021;3(1):13-24. doi:  
18 10.1002/hbe2.242  
19  
20 71. Ali L, Wallstrom S, Ekman I, et al. Effects of person-centred care via telephone on self-  
21 efficacy in patients with chronic obstructive pulmonary disease: Subgroup analysis of  
22 a randomized controlled trial. *Nurs Open* 2021;8(2):927-35. doi: 10.1002/nop2.701  
23 [published Online First: 2021/02/12]  
24  
25 72. Bostrom E, Ali L, Fors A, et al. Registered nurses' experiences of communication with  
26 patients when practising person-centred care over the phone: a qualitative interview  
27 study. *BMC Nurs* 2020;19:54. doi: 10.1186/s12912-020-00448-4 [published Online  
28 First: 2020/06/25]  
29  
30 73. Fors A, Ekman I, Taft C, et al. Person-centred care after acute coronary syndrome, from  
31 hospital to primary care - A randomised controlled trial. *Int J Cardiol* 2015;187:693-9.  
32 doi: 10.1016/j.ijcard.2015.03.336 [published Online First: 2015/04/29]  
33  
34 74. Fontein DB, Nortier JW, Liefers GJ, et al. High non-compliance in the use of letrozole after  
35 2.5 years of extended adjuvant endocrine therapy. Results from the IDEAL  
36 randomized trial. *Eur J Surg Oncol* 2012;38(2):110-7. doi: 10.1016/j.ejso.2011.11.010  
37 [published Online First: 2011/12/17]  
38  
39 75. Foster C, Breckons M, Cotterell P, et al. Cancer survivors' self-efficacy to self-manage in  
40 the year following primary treatment. *J Cancer Surviv* 2015;9(1):11-9. doi:  
41 10.1007/s11764-014-0384-0 [published Online First: 2014/07/17]  
42  
43 76. Sherer M, Maddux, J. E., Mercandante, B., Prentice-Dunn, S., Jacobs, B., & Rogers, R. W. .  
44 The self-efficacy scale: Construction and validation. . *Psychological reports*  
45 1982;51(2):663-71.  
46  
47 77. Lambert LK, Balneaves LG, Howard AF, et al. Understanding adjuvant endocrine therapy  
48 persistence in breast Cancer survivors. *BMC Cancer* 2018;18(1):732. doi:  
49 10.1186/s12885-018-4644-7 [published Online First: 2018/07/13]  
50  
51  
52  
53  
54

55 Figure 1. The care and measurement chain for the control and intervention groups. Both groups received the  
56 content in the blue area (usual care).

57 Abbreviations: Endocrine therapy – ET, Individual learning plan – ILP.  
58  
59  
60

1  
2  
3 Figure 2. Baseline and 3-month difference measures in the control and intervention groups for self-efficacy and  
4 reported symptoms.

5 Abbreviation: no – Number, SE – Self-efficacy.  
6  
7  
8  
9

10 Supplementary material:

11  
12 Supplementary file 1. Retention - CONSORT Flow diagram for the usual care group. Patients included  
13 September 2020 – December 2021.  
14

15 Supplementary file 2. Retention - CONSORT flow diagram for the person-centered support program group.  
16 Patients included December 2020 – March 2021.  
17

18 Supplementary file 3. Description of the education of the intervention nurse.  
19

20 Supplementary file 4. Median differences at baseline and 3 months in the control group and intervention group.  
21

22 Supplementary file 5. Interpretation of the QPP – Percentage agreement in a selection of QPP questions  
23  
24  
25  
26  
27  
28  
29  
30  
31  
32  
33  
34  
35  
36  
37  
38  
39  
40  
41  
42  
43  
44  
45  
46  
47  
48  
49  
50  
51  
52  
53  
54  
55  
56  
57  
58  
59  
60

1  
2  
3  
4  
5  
6  
7  
8  
9  
10  
11  
12  
13  
14  
15  
16  
17  
18  
19  
20  
21  
22  
23  
24  
25  
26  
27  
28  
29  
30  
31  
32  
33  
34  
35  
36  
37  
38  
39  
40  
41  
42  
43  
44  
45  
46  
47  
48  
49  
50  
51  
52  
53  
54  
55  
56  
57  
58  
59  
60



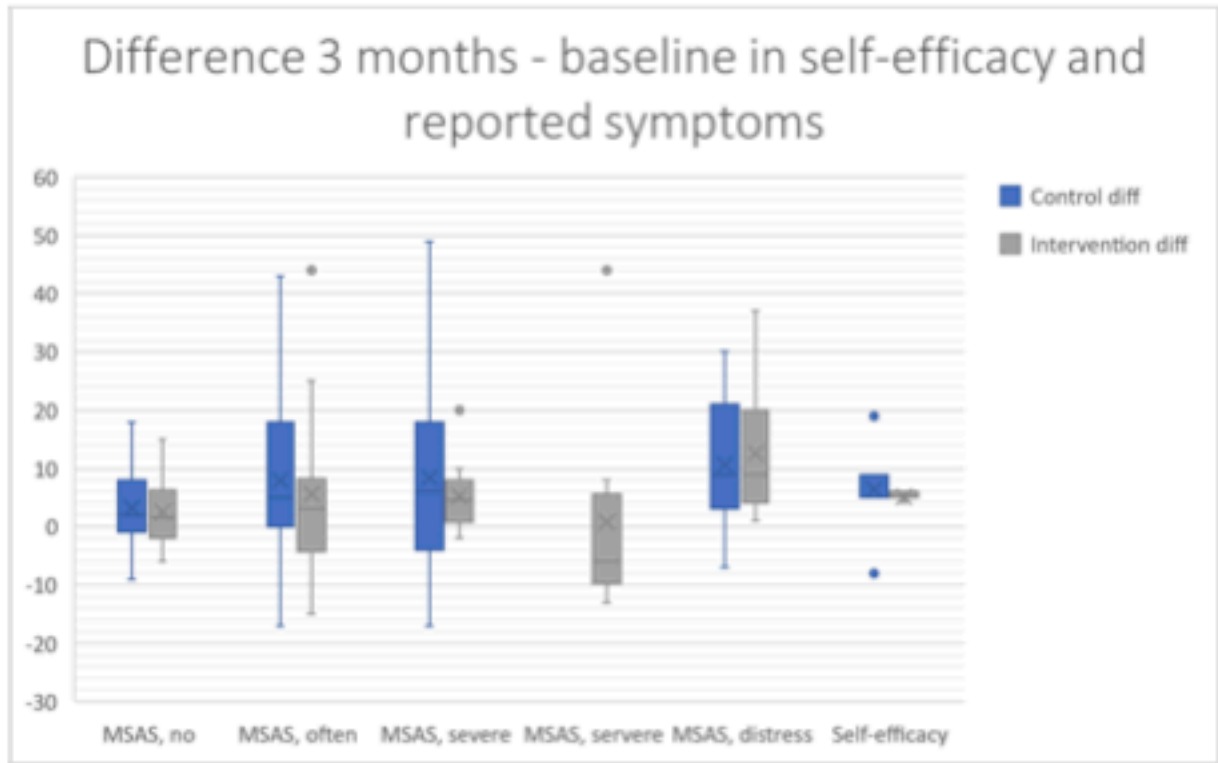



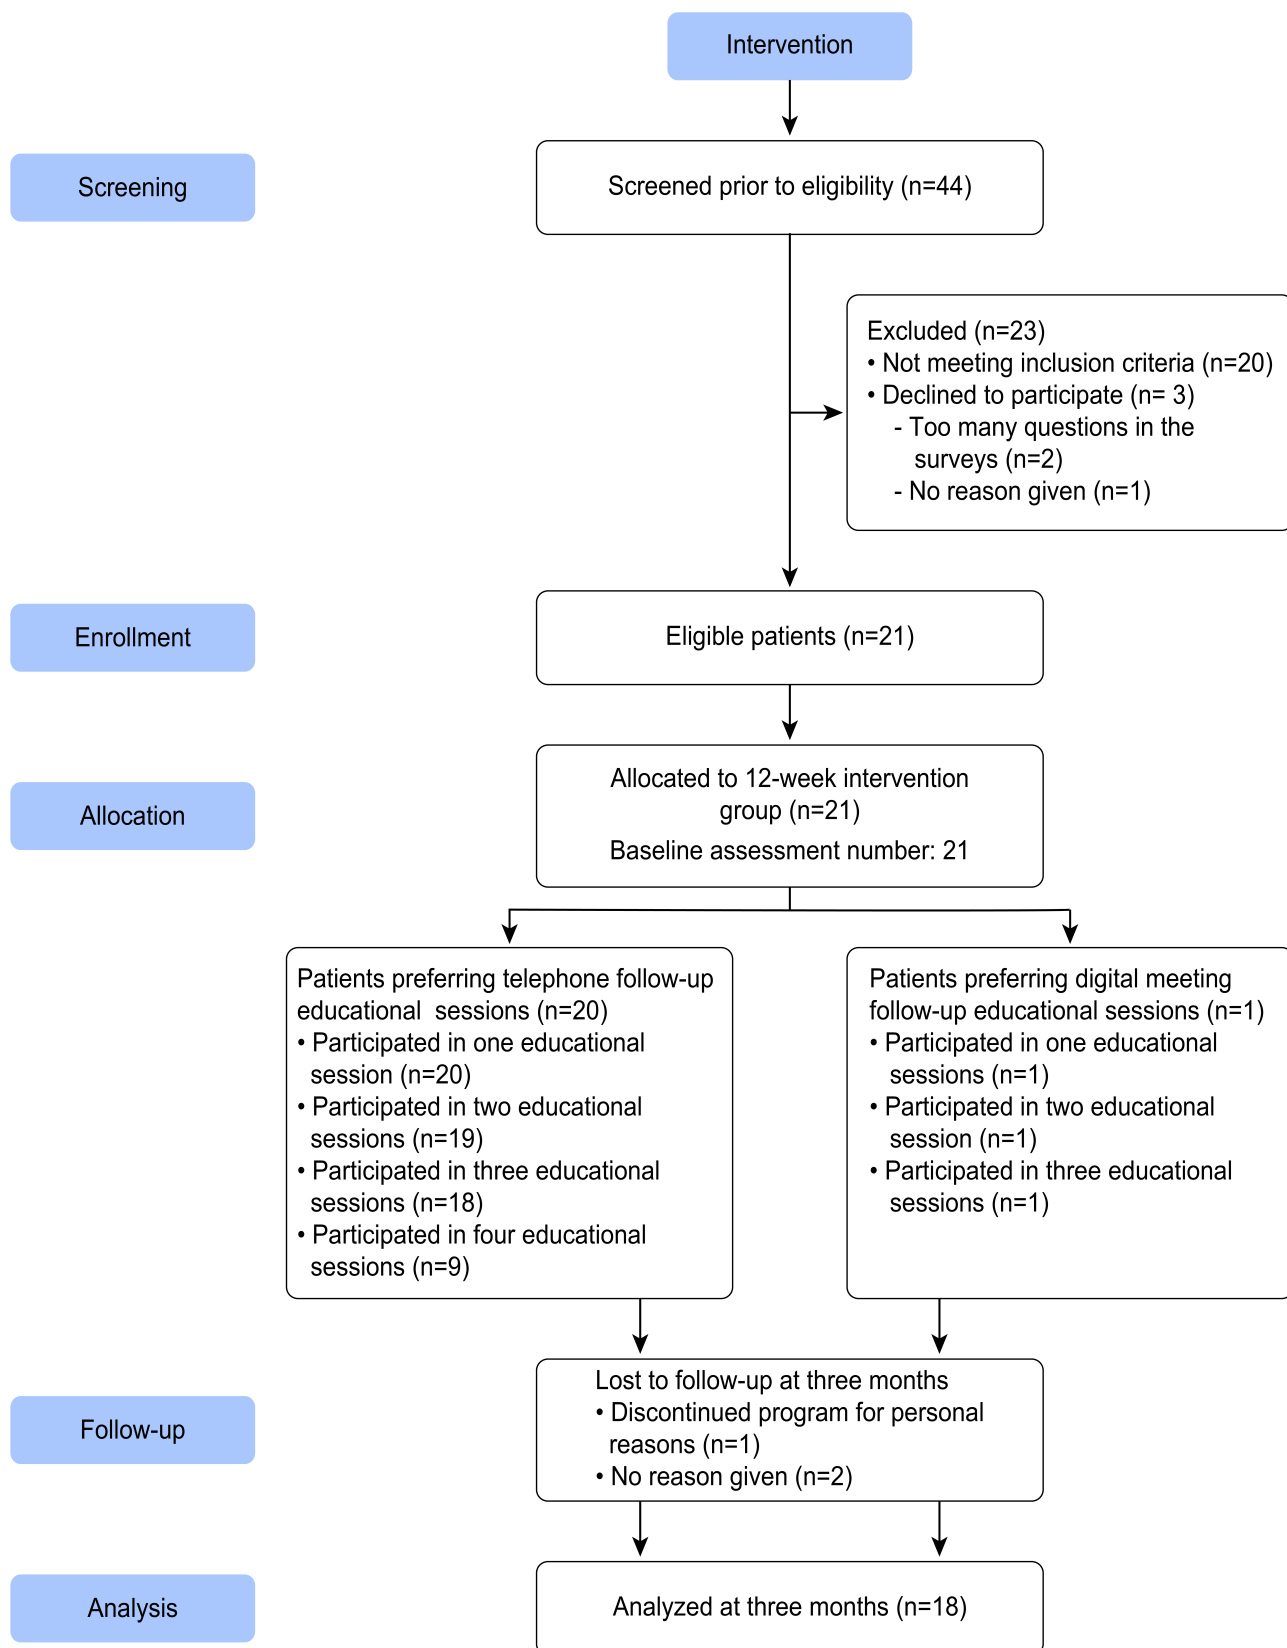

## Supplementary file 3. Description of the education of the intervention nurse.

| <b>Before Lecture:</b> The intervention nurse is asked to specifically reflect on the following in the care setting:<br><i>Problems with endocrine therapy</i><br><i>Symptom management</i><br><i>Cocreation with patients, barriers, facilitators.</i>                                                                                                                                                                                                |                                                                                                                                                                                                                                                                                       |                                                                                                                                                                                                                                                                                                                                   |                                                                         |
|--------------------------------------------------------------------------------------------------------------------------------------------------------------------------------------------------------------------------------------------------------------------------------------------------------------------------------------------------------------------------------------------------------------------------------------------------------|---------------------------------------------------------------------------------------------------------------------------------------------------------------------------------------------------------------------------------------------------------------------------------------|-----------------------------------------------------------------------------------------------------------------------------------------------------------------------------------------------------------------------------------------------------------------------------------------------------------------------------------|-------------------------------------------------------------------------|
| Sessions                                                                                                                                                                                                                                                                                                                                                                                                                                               | Content                                                                                                                                                                                                                                                                               | Learning outcomes                                                                                                                                                                                                                                                                                                                 | Learning activities                                                     |
| 1                                                                                                                                                                                                                                                                                                                                                                                                                                                      | Core principles about endocrine therapy (ET <sup>1</sup> ), including side effects of ET and symptom management described in research.<br><br>Symptom management theory.                                                                                                              | -Describe symptom management methods.<br>-Suggest strategies for symptom management during ET.                                                                                                                                                                                                                                    | Clinical case discussions, microteaching sessions, dialogs, reflection. |
| <b>Before Lecture:</b> The intervention nurse is asked to reflect on practical situations in the care setting when <i>applying dialog and person-centered care (PCC<sup>2</sup>)</i> .                                                                                                                                                                                                                                                                 |                                                                                                                                                                                                                                                                                       |                                                                                                                                                                                                                                                                                                                                   |                                                                         |
| Session                                                                                                                                                                                                                                                                                                                                                                                                                                                | Content                                                                                                                                                                                                                                                                               | Learning outcomes                                                                                                                                                                                                                                                                                                                 | Learning activities                                                     |
| 2                                                                                                                                                                                                                                                                                                                                                                                                                                                      | Pedagogical theory.                                                                                                                                                                                                                                                                   | - Describe pedagogic strategies using dialog to increase patients' self-care.<br>- Describe pedagogical strategies to increase patient participation.<br>- Describe dialogical methodology that strengthens patient participation.<br>-Evaluate whether chosen pedagogical strategies increase patients' self-management ability. | Clinical case discussions, microteaching sessions, dialogs, reflection. |
| <b>Before Lecture:</b> The intervention nurse is asked to reflect on practical situations in the care setting using knowledge from Session 2 and <i>relate to PCC</i> in a care setting.                                                                                                                                                                                                                                                               |                                                                                                                                                                                                                                                                                       |                                                                                                                                                                                                                                                                                                                                   |                                                                         |
| Session                                                                                                                                                                                                                                                                                                                                                                                                                                                | Content                                                                                                                                                                                                                                                                               | Learning outcomes                                                                                                                                                                                                                                                                                                                 | Learning activities                                                     |
| 3                                                                                                                                                                                                                                                                                                                                                                                                                                                      | PCC in the clinical care setting.                                                                                                                                                                                                                                                     | -Describe PCC.                                                                                                                                                                                                                                                                                                                    | Clinical case discussions, microteaching sessions, dialogs, reflection. |
| <b>Before Lecture:</b> The intervention nurse evaluates the <i>gained knowledge about PCC</i> in a practical situation in the care setting.                                                                                                                                                                                                                                                                                                            |                                                                                                                                                                                                                                                                                       |                                                                                                                                                                                                                                                                                                                                   |                                                                         |
| Session                                                                                                                                                                                                                                                                                                                                                                                                                                                | Content                                                                                                                                                                                                                                                                               | Learning outcomes                                                                                                                                                                                                                                                                                                                 | Learning activities                                                     |
| 4                                                                                                                                                                                                                                                                                                                                                                                                                                                      | The three intervention components, i.e., individual education material, individualized learning plan, and a personalized reminder letter (Ahlstedt Karlsson, et al, 2022) with a starting point in the contact nurse's experience from a practical situation in the clinical setting. | -Explain the components of the intervention.                                                                                                                                                                                                                                                                                      | Clinical case discussions, dialogs, reflection.                         |
| <b>After Lecture:</b> With a starting point in the newly gained knowledge, <i>apply PCC, knowledge about ET, pedagogical theory and the three components</i> in the intervention in a care setting.                                                                                                                                                                                                                                                    |                                                                                                                                                                                                                                                                                       |                                                                                                                                                                                                                                                                                                                                   |                                                                         |
| <b>Proficiency goal after completed education:</b><br>The intervention nurse can:<br>- Evaluate whether the proposed symptom management strategies increase the patient's management of ET-related symptoms.<br>- Assess whether the patient's need for care was met.<br>- Review and evaluate whether selected pedagogical strategies strengthen the patient's self-care ability.<br>- Evaluate the patient's participation in ET symptom management. |                                                                                                                                                                                                                                                                                       |                                                                                                                                                                                                                                                                                                                                   |                                                                         |
| <b>Evaluation ability after completed education:</b><br>The intervention nurse can:<br>- Suggest strategies for managing symptoms in relation with ET.<br>- Together with the patient, identify care needs.<br>- Apply pedagogical strategies that strengthen patients' self-care ability.<br>- Apply dialogical methodology that strengthens patients' participation.                                                                                 |                                                                                                                                                                                                                                                                                       |                                                                                                                                                                                                                                                                                                                                   |                                                                         |

Abbreviations: ET – Endocrine therapy, PCC – Person-centered care.

Supplementary file 4. Median differences at baseline and 3 months in the control group and intervention group.

|                              | Control                   |                        |                               | Intervention              |                           |                               | p-value* |
|------------------------------|---------------------------|------------------------|-------------------------------|---------------------------|---------------------------|-------------------------------|----------|
|                              | Baseline No, Median (IQR) | 3 months, Median (IQR) | Change from baseline (median) | Baseline No, Median (IQR) | 3 months No, Median (IQR) | Change from baseline (median) |          |
| SE, median (IQR)             | 31 (27-40)                | 31 (22-39)             | 0.5                           | 30 (26-35)                | 30 (30-38)                | 0                             | 0.731    |
| MSAS, no median (IQR)        | 6 (3-11)                  | 9 (3-18)               | 2                             | 7 (3-13)                  | 10 (5-22)                 | 1                             | 0.724    |
| MSAS, often, median (IQR)    | 11 (2-36)                 | 13 (6-38)              | 7.5                           | 14 (4-25)                 | 15 (7-49)                 | 2                             | 0.504    |
| MSAS, severe, median (IQR)   | 12 (0-26)                 | 13 (5-52)              | 5                             | 10 (3-23)                 | 13 (6-40)                 | 2                             | 0.393    |
| MSAS, distress, median (IQR) | 11 (0-28)                 | 12 (3-30)              | 5.5                           | 8 (2-19)                  | 12 (6-39)                 | 2                             | 0.600    |

\*Mann-Whitney test comparing changes from baseline between the control and intervention groups.

Abbreviation: Often- How often the patient had a symptom, Severe- How severe was the symptom usually experienced by the patient, Distress- How much did the experienced symptom distress or bother the patient.

Supplementary file 5. Interpretation of the QPP – Percentage agreement in a selection of QPP questions

|                                                                                                  | Control 3 months, n (%) | Intervention 3 months, n (%) |
|--------------------------------------------------------------------------------------------------|-------------------------|------------------------------|
| 13. I received useful information on what I needed to be able to participate in my own care      | 16* (93.75%)            | 17* (88.24%)                 |
| 19. I had adequate information about my medicine, so I understood the effect and how to use them | 18* (77.78%)            | 18* (72.22%)                 |
| 20. I had an opportunity to share my experience with the health care professionals               | 15* (86.67%)            | 17* (82.35%)                 |
| 32. I had a good opportunity to confer in decisions about my own care                            | 14* (85.71%)            | 15* (73.33%)                 |
| 33. I had a good opportunity to participate in my own care                                       | 15* (86.67%)            | 12* (75.00%)                 |
| 34. My care was directed by my needs rather than the health care professionals' routines         | 16* (100%)              | 17* (82.35%)                 |

\*Caution: If less than 30, the results should be regarded with caution.

To measure perceived reality concerning the quality of care, every question was phrased as a statement. The response alternatives were given as a scale between 4 (Fully agree) and 1 (Do not agree at all). Percentage in agreement represents the patients who answered 3 (Mostly agree) and 4 (Fully agree) divided by the total number of patients who answered 1-4 on the question. Answer 5 (Not applicable) is not included.





## CONSORT 2010 checklist of information to include when reporting a pilot or feasibility trial\*

| Section/Topic                    | Item No | Checklist item                                                                                                                                                                              | Reported on page No |
|----------------------------------|---------|---------------------------------------------------------------------------------------------------------------------------------------------------------------------------------------------|---------------------|
| <b>Title and abstract</b>        |         |                                                                                                                                                                                             |                     |
|                                  | 1a      | Identification as a pilot or feasibility randomised trial in the title                                                                                                                      | 1                   |
|                                  | 1b      | Structured summary of pilot trial design, methods, results, and conclusions (for specific guidance see CONSORT abstract extension for pilot trials)                                         | 1                   |
| <b>Introduction</b>              |         |                                                                                                                                                                                             |                     |
| Background and objectives        | 2a      | Scientific background and explanation of rationale for future definitive trial, and reasons for randomised pilot trial                                                                      | 4                   |
|                                  | 2b      | Specific objectives or research questions for pilot trial                                                                                                                                   | 5                   |
| <b>Methods</b>                   |         |                                                                                                                                                                                             |                     |
| Trial design                     | 3a      | Description of pilot trial design (such as parallel, factorial) including allocation ratio                                                                                                  | 5                   |
|                                  | 3b      | Important changes to methods after pilot trial commencement (such as eligibility criteria), with reasons                                                                                    | NA                  |
| Participants                     | 4a      | Eligibility criteria for participants                                                                                                                                                       | 6                   |
|                                  | 4b      | Settings and locations where the data were collected                                                                                                                                        | 6                   |
|                                  | 4c      | How participants were identified and consented                                                                                                                                              | 6                   |
| Interventions                    | 5       | The interventions for each group with sufficient details to allow replication, including how and when they were actually administered                                                       | 6-7                 |
| Outcomes                         | 6a      | Completely defined prespecified assessments or measurements to address each pilot trial objective specified in 2b, including how and when they were assessed                                | 8                   |
|                                  | 6b      | Any changes to pilot trial assessments or measurements after the pilot trial commenced, with reasons                                                                                        | NA                  |
|                                  | 6c      | If applicable, prespecified criteria used to judge whether, or how, to proceed with future definitive trial                                                                                 | NA                  |
| Sample size                      | 7a      | Rationale for numbers in the pilot trial                                                                                                                                                    | 7                   |
|                                  | 7b      | When applicable, explanation of any interim analyses and stopping guidelines                                                                                                                | NA                  |
| Randomisation:                   |         |                                                                                                                                                                                             |                     |
| Sequence generation              | 8a      | Method used to generate the random allocation sequence                                                                                                                                      | NA                  |
|                                  | 8b      | Type of randomisation(s); details of any restriction (such as blocking and block size)                                                                                                      | NA                  |
| Allocation concealment mechanism | 9       | Mechanism used to implement the random allocation sequence (such as sequentially numbered containers), describing any steps taken to conceal the sequence until interventions were assigned | NA                  |

|                                                      |     |                                                                                                                                                                                       |                                    |
|------------------------------------------------------|-----|---------------------------------------------------------------------------------------------------------------------------------------------------------------------------------------|------------------------------------|
| Implementation                                       | 10  | Who generated the random allocation sequence, who enrolled participants, and who assigned participants to interventions                                                               | NA                                 |
| Blinding                                             | 11a | If done, who was blinded after assignment to interventions (for example, participants, care providers, those assessing outcomes) and how                                              | NA                                 |
|                                                      | 11b | If relevant, description of the similarity of interventions                                                                                                                           | NA                                 |
| Statistical methods                                  | 12  | Methods used to address each pilot trial objective whether qualitative or quantitative                                                                                                | 9                                  |
| <b>Results</b>                                       |     |                                                                                                                                                                                       |                                    |
| Participant flow (a diagram is strongly recommended) | 13a | For each group, the numbers of participants who were approached and/or assessed for eligibility, randomly assigned, received intended treatment, and were assessed for each objective | 10                                 |
|                                                      | 13b | For each group, losses and exclusions after randomisation, together with reasons                                                                                                      | 10                                 |
| Recruitment                                          | 14a | Dates defining the periods of recruitment and follow-up                                                                                                                               | 10                                 |
|                                                      | 14b | Why the pilot trial ended or was stopped                                                                                                                                              | NA                                 |
| Baseline data                                        | 15  | A table showing baseline demographic and clinical characteristics for each group                                                                                                      | Table 1                            |
| Numbers analysed                                     | 16  | For each objective, number of participants (denominator) included in each analysis. If relevant, these numbers should be by randomised group                                          | Figure 1 and 2. Supplementary file |
| Outcomes and estimation                              | 17  | For each objective, results including expressions of uncertainty (such as 95% confidence interval) for any estimates. If relevant, these results should be by randomised group        | NA                                 |
| Ancillary analyses                                   | 18  | Results of any other analyses performed that could be used to inform the future definitive trial                                                                                      | NA                                 |
| Harms                                                | 19  | All important harms or unintended effects in each group (for specific guidance see CONSORT for harms)                                                                                 | NA                                 |
|                                                      | 19a | If relevant, other important unintended consequences                                                                                                                                  | NA                                 |
| <b>Discussion</b>                                    |     |                                                                                                                                                                                       |                                    |
| Limitations                                          | 20  | Pilot trial limitations, addressing sources of potential bias and remaining uncertainty about feasibility                                                                             | 14                                 |
| Generalisability                                     | 21  | Generalisability (applicability) of pilot trial methods and findings to future definitive trial and other studies                                                                     | 13                                 |
| Interpretation                                       | 22  | Interpretation consistent with pilot trial objectives and findings, balancing potential benefits and harms, and considering other relevant evidence                                   | 13                                 |
|                                                      | 22a | Implications for progression from pilot to future definitive trial, including any proposed amendments                                                                                 | 14                                 |
| <b>Other information</b>                             |     |                                                                                                                                                                                       |                                    |
| Registration                                         | 23  | Registration number for pilot trial and name of trial registry                                                                                                                        | NA                                 |
| Protocol                                             | 24  | Where the pilot trial protocol can be accessed, if available                                                                                                                          | NA                                 |
| Funding                                              | 25  | Sources of funding and other support (such as supply of drugs), role of funders                                                                                                       | 15                                 |

|  |    |                                                                                            |    |
|--|----|--------------------------------------------------------------------------------------------|----|
|  | 26 | Ethical approval or approval by research review committee, confirmed with reference number | 15 |
|--|----|--------------------------------------------------------------------------------------------|----|

1  
2  
3 Citation: Eldridge SM, Chan CL, Campbell MJ, Bond CM, Hopewell S, Thabane L, et al. CONSORT 2010 statement: extension to randomised pilot and feasibility trials. *BMJ*. 2016;355.  
4 \*We strongly recommend reading this statement in conjunction with the CONSORT 2010, extension to randomised pilot and feasibility trials, Explanation and Elaboration for important  
5 clarifications on all the items. If relevant, we also recommend reading CONSORT extensions for cluster randomised trials, non-inferiority and equivalence trials, non-pharmacological  
6 treatments, herbal interventions, and pragmatic trials. Additional extensions are forthcoming: for those and for up to date references relevant to this checklist, see [www.consort-statement.org](http://www.consort-statement.org).  
7  
8  
9  
10  
11  
12  
13  
14  
15  
16  
17  
18  
19  
20  
21  
22  
23  
24  
25  
26  
27  
28  
29  
30  
31  
32  
33  
34  
35  
36  
37  
38  
39  
40  
41  
42  
43  
44  
45  
46

For peer review only

# BMJ Open

## A person-centered support program (RESPECT intervention) for women with breast cancer treated with endocrine therapy: A feasibility study

|                                 |                                                                                                                                                                                                                                                                                            |
|---------------------------------|--------------------------------------------------------------------------------------------------------------------------------------------------------------------------------------------------------------------------------------------------------------------------------------------|
| Journal:                        | <i>BMJ Open</i>                                                                                                                                                                                                                                                                            |
| Manuscript ID                   | bmjopen-2022-060946.R3                                                                                                                                                                                                                                                                     |
| Article Type:                   | Original research                                                                                                                                                                                                                                                                          |
| Date Submitted by the Author:   | 13-Sep-2022                                                                                                                                                                                                                                                                                |
| Complete List of Authors:       | Ahlstedt Karlsson, Susanne; Sahlgrenska Academy, Health Care Sciences<br>Henoch, Ingela; Goteborgs Universitet, Institute of health and care sciences<br>Olofsson Bagge, Roger; Sahlgrenska Academy, Clinical Sciences<br>Wallengren, Catarina ; Sahlgrenska Academy, Health Care Sciences |
| <b>Primary Subject Heading</b>: | Nursing                                                                                                                                                                                                                                                                                    |
| Secondary Subject Heading:      | Nursing, Oncology                                                                                                                                                                                                                                                                          |
| Keywords:                       | Breast tumours < ONCOLOGY, Quality in health care < HEALTH SERVICES ADMINISTRATION & MANAGEMENT, QUALITATIVE RESEARCH                                                                                                                                                                      |
|                                 |                                                                                                                                                                                                                                                                                            |

SCHOLARONE™  
Manuscripts

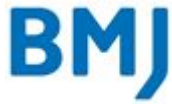

I, the Submitting Author has the right to grant and does grant on behalf of all authors of the Work (as defined in the below author licence), an exclusive licence and/or a non-exclusive licence for contributions from authors who are: i) UK Crown employees; ii) where BMJ has agreed a CC-BY licence shall apply, and/or iii) in accordance with the terms applicable for US Federal Government officers or employees acting as part of their official duties; on a worldwide, perpetual, irrevocable, royalty-free basis to BMJ Publishing Group Ltd ("BMJ") its licensees and where the relevant Journal is co-owned by BMJ to the co-owners of the Journal, to publish the Work in this journal and any other BMJ products and to exploit all rights, as set out in our [licence](#).

The Submitting Author accepts and understands that any supply made under these terms is made by BMJ to the Submitting Author unless you are acting as an employee on behalf of your employer or a postgraduate student of an affiliated institution which is paying any applicable article publishing charge ("APC") for Open Access articles. Where the Submitting Author wishes to make the Work available on an Open Access basis (and intends to pay the relevant APC), the terms of reuse of such Open Access shall be governed by a Creative Commons licence – details of these licences and which [Creative Commons](#) licence will apply to this Work are set out in our licence referred to above.

Other than as permitted in any relevant BMJ Author's Self Archiving Policies, I confirm this Work has not been accepted for publication elsewhere, is not being considered for publication elsewhere and does not duplicate material already published. I confirm all authors consent to publication of this Work and authorise the granting of this licence.

1  
2  
3  
4 **A person-centered support program (RESPECT intervention) for women with breast cancer**  
5  
6  
7 **treated with endocrine therapy: A feasibility study**  
8  
9  
10

11 Ahlstedt Karlsson, Susanne<sup>1,2</sup> Orcid ID: 0000-0001-5436-5476; Henoeh, Ingela<sup>2</sup> Orcid ID: 0000-0002-1987-  
12 5419; Olofsson Bagge, Roger<sup>1,3</sup> Orcid ID: 0000-0001-5795-0355; Wallengren, Catarina<sup>2</sup> Orcid ID: 0000-0002-  
13 8124-1572  
14  
15

16  
17  
18 <sup>1</sup>Department of Surgery, Sahlgrenska University Hospital, Gothenburg, Sweden.

19 <sup>2</sup>Institute of Health and Care Sciences, Sahlgrenska Academy at the University of Gothenburg, University of  
20 Gothenburg, Gothenburg, Sweden

21 <sup>3</sup>Department of Surgery, Institute of Clinical Sciences, Sahlgrenska Academy at the University of Gothenburg,  
22 Gothenburg, Sweden.  
23  
24

25  
26 # Correspondence to: Susanne Ahlstedt Karlsson, Institute of Health and Care Sciences, Sahlgrenska Academy  
27 at the University of Gothenburg, University of Gothenburg, Gothenburg, Sweden

28  
29 E-mail: susanne.ahlstedt.karlsson@gu.se

30 Telephone: +46 704153666  
31  
32  
33  
34  
35  
36

37  
38 Keywords: Breast cancer, endocrine therapy, intervention, feasibility, person-centered support program  
39  
40  
41

42 Wordcount: 5345  
43  
44  
45  
46  
47  
48  
49  
50  
51  
52  
53  
54  
55  
56  
57  
58  
59  
60

## ABSTRACT

**Objective:** The peRson-cEntred Support Program EndoCrine Therapy (RESPECT) intervention is a complex intervention encompassing a person-centered support program for patients with breast cancer being treated with endocrine therapy. The aim of this study was to explore the feasibility of the trial design and patient acceptability of the intervention and outcome measures and to provide data to estimate the parameters required to design the final intervention.

**Design:** A controlled before-and-after design following the CONSORT 2010 statement for feasibility trials.

**Setting:** A surgical outpatient clinic in Sweden.

**Participants:** Forty-one patients (aged 47–85) with breast cancer who were treated with endocrine therapy.

**Interventions:** Eligible patients were assigned to the control group or intervention group, which included individual education material, an individualized learning plan, and a personalized reminder letter using a person-centered approach. The intervention could be delivered as a telephone or digital follow-up during a 12-week follow-up.

**Outcome measures:** The aims were to determine the recruitment rate, assess the rate of retention, explore whether the intervention was delivered according to the protocol, assess the preferred form of educational support, rate of education sessions, length per education session, and length between each education session, determine the distribution of education materials, and assess completion rates of patient-report instruments, including the General Self-efficacy Scale, the Quality of Care from the Patient's Perspective questionnaire, and the Memorial Symptom Assessment Scale.

**Results:** Eighty-six percent of the patients in the intervention group completed the intervention and questionnaires three months after their inclusion. The call attendance was 90%. During the intervention, the contact nurse complied with the intervention protocol. For self-efficacy, symptoms, and quality of care, there were no differences in effect size between the control and intervention groups.

**Conclusions:** This intervention seems to be feasible and acceptable among patients.



## Article summary

### *Strengths and limitations of this study*

- This is the first study to investigate the feasibility of a person-centered support model for patients with breast cancer treated with endocrine therapy.
- This study uses the CONSORT 2010 statement for feasibility trials.
- This study reports the recruitment rate, assesses the rate of retention, explores whether the intervention was delivered according to the protocol, assesses the preferred form of educational support, rate of education sessions, length per education session, and length between each education session, determines the distribution of education materials, and assesses completion rates of patient-report instruments.
- Due to the COVID-19 pandemic, face-to-face sessions were restricted.

## BACKGROUND

For women diagnosed with hormone receptor-positive breast cancer, endocrine therapy (ET), i.e., the use of tamoxifen or aromatase inhibitors, is recommended for at least five years to reduce recurrence and rates of mortality<sup>1</sup>. A previous study reported that up to 91% of patients experience side effects from ET<sup>2</sup>, such as sleeping difficulties, hot flashes<sup>3,4</sup> and musculoskeletal symptoms<sup>5</sup>. Difficulties in managing these side effects have been reported to be obstacles to staying in treatment<sup>6</sup>. Other challenges that have been identified include older age<sup>7</sup>, medicine costs, or a general dislike of taking a regular medicine<sup>8</sup>. As ET is a long-lasting treatment, women may request support in managing challenges<sup>9</sup>. To manage challenges with ET, a partnership with health care professionals could be appropriate, as a previous study<sup>10</sup> identified that women with ET want to be able to manage their treatment but need guidance to do so.

Regarding the management of ET-related symptoms, previous studies have investigated the effect of symptom management interventions for patients prescribed ET<sup>11-13</sup>. A study identified management needs for ET symptoms, emotional needs, and needs for information acquisition and found that patients' relationship with health care providers was important<sup>12</sup>. A combination of information with cognitive behavioral therapy (CBT) to manage the side effects of tamoxifen showed successful results for the development of management skills among patients who were unable to stay in treatment<sup>11</sup>. Furthermore, training intervention with a physiotherapist or personal trainer followed by adapted training at home could be effective. However, a problem with this intervention was program adherence, as patients reported difficulty meeting the training goal in frequency and intensity due to other demands in life<sup>14</sup>. Additionally, training has not been found to have an effect on musculoskeletal symptoms in patients treated with AIs<sup>15</sup>. Managing a disease and its additional challenges requires self-care knowledge and skills gained from a partnership with health care professionals<sup>16</sup>. Self-care involves the ability to both care for oneself and to achieve, promote and maintain optimal health<sup>17</sup>. A common feature of self-care and person-centered care (PCC) is the ability to view humans as the agent and the subject of action<sup>18,19</sup>. To include aspects of treatment important to the individual patient, such as different side effects, health care structures, fear of side effects, and lack of management skills and for support, a person-centered support program was developed<sup>10</sup>. As self-care requires knowledge and skills<sup>16</sup>, PCC could be appropriate for use in a support program. Self-care requisites are described as all elements that individuals need at all stages in life to care for themselves, i.e., air, food, and water; self-care requisites also depend on how individuals react to illness<sup>16</sup>. PCC can be a preferable way of identifying those requisites, as they can be identified in the narratives and used in the patient-health care provider

1  
2  
3 partnership<sup>19</sup>. Patients are often motivated to engage in self-care, as they have personal interest in  
4 acquiring requisite knowledge and skills for performing self-care operations to reach their intended  
5 health goals<sup>16</sup>. It has been shown that when self-care capabilities increase<sup>20</sup>, self-efficacy and adherence  
6 to ET also increase<sup>21 22</sup>. Self-efficacy constitutes the self-image of the person and affects how people  
7 experience and behave in specific situations<sup>23</sup>. Previous studies using PCC have improved patients'  
8 self-efficacy<sup>24-26</sup>.

9  
10  
11  
12  
13 It is important for patients to not only identify accurate information but also assess and integrate the  
14 information to gain increased knowledge, self-efficacy, and self-care skills<sup>10</sup>. Moreover, in addition to  
15 the emotional needs identified by Kim et al. (2020), it is important to assess the amount of needed  
16 information and to explore patients' understanding of diagnosis and treatment<sup>27</sup>. For written health  
17 education materials to be effective, the patient must be able to apply the new information to her own  
18 life. This can be achieved by providing understandable examples and presenting the information so the  
19 patient sees its relevance to her situation<sup>28</sup>, as the ultimate reason for educating patients is to improve  
20 health<sup>29</sup>.

21  
22  
23  
24  
25  
26  
27 In Sweden, all patients are allocated a contact nurse when diagnosed with breast cancer. The contact  
28 nurse functions as the main point of contact during the patient's cancer treatments to reduce fragmented  
29 care and to strengthen patient involvement in care<sup>30</sup>. It has been suggested that contact nurses have a  
30 positive impact on care. Contact nurses aim to improve communication between patients and their health  
31 care professionals, as well as improve the care process<sup>31</sup>. However, it has been reported that other factors  
32 seem to decrease contact nurses' ability to provide the care they are meant to. Named reasons are  
33 challenges regarding the lack of information to patients and lack of supportive care resources. Although  
34 the patients had a contact nurse, the patients reported how they lacked the possibility to influence  
35 decisions about their care<sup>32</sup>.

36  
37  
38  
39  
40  
41  
42  
43 A previous study developed a person-centered support program in collaboration among patients, health  
44 care professionals, researchers and managers with ET experience<sup>10</sup> that needed to be tested in a  
45 feasibility study using the TIDieR checklist<sup>33</sup> and the CONSORT 2010 statement<sup>34</sup>. Previous studies  
46 have used feasibility studies prior to conducting a study in a larger setting<sup>9 35</sup>. The intervention was  
47 developed to encourage patients to be more actively involved in their care and wellbeing as partners  
48 with their contact nurse<sup>10</sup>. It has been stated that an intervention could be considered complex due to  
49 the behaviors required by those delivering the intervention<sup>36</sup>, i.e., a contact nurse. The complexity is  
50 caused by the context in which the intervention is to be implemented rather than the number of parts of  
51 the intervention<sup>37</sup>. It has been reported that complex interventions require engagements with the care  
52 context stakeholders, i.e., patients and contact nurses, to be able to identify if the intervention could be  
53 acceptable, operable, cost-effective, possible to scale up, and transferable across contexts. The  
54  
55  
56  
57  
58  
59  
60

1  
2  
3 development phases were identified, including developing or using an existing complex intervention,  
4 feasibility, evaluation, and implementation <sup>38</sup>.  
5  
6  
7  
8  
9

## 10 **Aim**

11 In this feasibility trial, the aim was to explore the feasibility of the study design and the patient  
12 acceptability of the peRson-cEntred Support Program EndoCrine Therapy (RESPECT) intervention and  
13 outcome measures and to provide data to estimate the parameters required to design the final  
14 intervention.  
15  
16  
17  
18

## 19 **METHODS**

### 20 *Study design*

21 This was a feasibility trial using a controlled before-and-after design <sup>39</sup> to investigate the feasibility of  
22 the intervention, a person-centered support program aimed at empowering patients prescribed ET to  
23 manage ET-related symptoms and problems. Allocation was based on inclusion time and not on patient  
24 preferences.  
25  
26  
27  
28  
29

### 30 *Patient and public involvement*

31 Patients and health care professionals were involved in the design and development of the person-  
32 centered support model <sup>10</sup>. However, there was no patient involvement in the evaluation of the person-  
33 centered support model presented in this study.  
34  
35  
36  
37

### 38 *Participants*

39 Between September 2020 and June 2021, 66 potential female patients from one outpatient clinic at one  
40 university hospital in Sweden were identified as eligible for inclusion when starting ET. Patients in the  
41 control group were included from September 2020 to December 2021, while patients in the  
42 intervention group were included from December 2021 to March 2021. The inclusion criteria were  
43 women > 18 years of age who had been diagnosed with breast cancer and treated with ET after  
44 surgery. Patients receiving adjuvant chemotherapy were excluded as the study aimed to investigate an  
45 intervention targeting patients treated with ET. All patients were contacted by a contact nurse and  
46 were invited by telephone to participate in the study approximately three weeks after their surgery  
47 when prescribed ET (Table 1). In the online supplementary materials, the CONSORT flow diagrams  
48 for the usual care group and person-centered support program group are available (Supplementary  
49 files 1 and 2).  
50  
51  
52  
53  
54  
55  
56  
57  
58  
59  
60

All patients were given verbal and written information about the study, and after agreeing to have an informed consent form sent to them by mail, they all provided written informed consent. If the patient agreed to participate, she sent the informed consent form back using a prepaid envelope.

Table 1. Demographic and clinical characteristics of the participants in the control group (n=20) and intervention group (n=21) in the RESPECT project.

| <b>Demographic characteristics</b>    | <b>Control group n=20</b> | <b>Intervention group n=21</b> |
|---------------------------------------|---------------------------|--------------------------------|
| <i>Median age, years (range)</i>      | 65 (50-85)                | 66 (47-79)                     |
| <i>Civil status, n (%)</i>            |                           |                                |
| <i>Married/cohabiting</i>             | 12 (63%)                  | 16 (76%)                       |
| <i>Single</i>                         | 8 (37%)                   | 5 (23%)                        |
| <i>Ancestral homeland, n (%)</i>      |                           |                                |
| <i>Sweden</i>                         | 16 (80%)                  | 18 (86%)                       |
| <i>Scandinavian countries</i>         | 1 (5%)                    | 1 (5%)                         |
| <i>Europe</i>                         | 1 (5%)                    | 2 (10%)                        |
| <i>Outside Europe</i>                 | 1 (5%)                    | 0 (0%)                         |
| <i>Education, n (%)</i>               |                           |                                |
| <i>University</i>                     | 9 (45%)                   | 10 (48%)                       |
| <i>High school</i>                    | 8 (40%)                   | 8 (38%)                        |
| <i>Elementary school</i>              | 3 (15%)                   | 3 (14%)                        |
| <i>Radiation therapy, n (%)</i>       | 16 (80%)                  | 21 (100%)                      |
| <i>Tumor size, median mm (range)</i>  | 14 (4-45)                 | 12 (1-19)                      |
| <i>Breast surgery</i>                 |                           |                                |
| <i>Mastectomy</i>                     | 4 (20%)                   | 2 (10%)                        |
| <i>Partial mastectomy</i>             | 15 (75%)                  | 19 (90%)                       |
| <i>Axillary lymph node dissection</i> | 1 (0.5%)                  | 0 (0%)                         |
| <i>Tamoxifen, n (%)</i>               | 9 (45%)                   | 9 (43%)                        |
| <i>Aromatase inhibitor, n (%)</i>     | 11 (55%)                  | 12 (57)                        |

#### *Control group*

Usual care (UC) involves patients being allocated a contact nurse (an experienced undergraduate nurse or postgraduate nurse in surgical care), as the Swedish Patient Act <sup>40</sup> gives patients a statutory right to permanent contact with a health care professional. Internationally, the role is called Clinical Nurse Specialist <sup>41</sup> and is identified as a valuable resource in cancer care <sup>42</sup>.

Patients can contact the contact nurse all weekdays by telephone or by using a nationwide digital tool, 1177.se <sup>43</sup>. All patients receive written information as a brochure or a digital “My care and rehabilitation plan” when diagnosed with breast cancer. Support in usual care aims to give patients information about their state of health, available methods for examinations, care, and treatments, as well as information about at which time point she can expect to receive care and permanent contact with the health care provider. The contact nurse writes down the information that is available before surgery, such as tumor

1  
2  
3 characteristics and surgery preparations. The patient can also write down questions to bring to upcoming  
4 appointments. Usual care is based on patients' initiative to make contact.  
5  
6  
7  
8  
9

### 10 *Intervention group*

11 The intervention was provided in a surgical outpatient clinic in western Sweden from December 2020-  
12 June 2021. The goal of the intervention was to empower patients prescribed ET to manage ET-related  
13 symptoms and problems. In addition to UC, a 12-week intervention was offered to the participants in  
14 the intervention group as described in a previous study <sup>10</sup>. Figure 1 shows the care and measurement  
15 chain for the control and intervention groups.  
16  
17  
18  
19  
20  
21

#### 22 *Step 1- Individual education material*

23 Using a PCC approach <sup>19</sup>, the contact nurse listened to patients' narratives regarding their individual  
24 needs for knowledge and understanding, resources, goals and needs for support from the contact nurse.  
25 The timing of the supply of individual educational materials depended on the individual patient's needs,  
26 resources and goals during the 12-week intervention. Mutual trust was demonstrated, and the  
27 relationship between the patient and her contact nurse was reinforced through the assessment of the  
28 commonly agreed upon individualized learning plan <sup>44</sup>.  
29  
30  
31  
32  
33

#### 34 *Step 2 - An individualized learning plan (ILP)*

35 An ILP was established depending on the individual patient's needs for knowledge and understanding  
36 about ET and considering the patient's resources, goals, and needs for education material and support  
37 from the contact nurse. In combination with the individual educational materials (Step 1), a follow-up  
38 plan was made using telephone and/or digital follow-up. Physical follow-ups were minimized as the  
39 COVID-19 pandemic was ongoing. The number of follow-up sessions and whether relatives were to be  
40 included during the 12-week intervention were agreed upon between the patient and the contact nurse.  
41 Patients could also refuse all educational material and other materials and only use the contact nurse for  
42 support.  
43  
44  
45  
46  
47  
48  
49

#### 50 *Step 3 – A personalized reminder letter*

51 The third part of the support program was a personalized reminder letter after three months, including  
52 contact information and an invitation for patients to make contact if needed.  
53  
54  
55  
56  
57

58 **Please insert Figure 1 about here**  
59  
60

### *Education of the intervention nurse*

The aim of the education was to increase the intervention nurse's knowledge and understanding of ET, its problems and symptom management using PCC. Microteaching<sup>45 46</sup> sessions and seminars were used; the microteaching sessions were adapted to the specific needs of knowledge about endocrine therapy, side effects<sup>47</sup>, pedagogy<sup>48</sup> and PCC<sup>19 49</sup>, and the chosen approach was intended to help the contact nurse take responsibility for her own learning, i.e., student-centered learning<sup>50</sup>. Additionally, practical exercises were used, as the contact nurse was able to practice her knowledge and understanding in a care setting and reflect on it, and the intervention nurse's curiosity was used as a motivator to gain knowledge<sup>48</sup>. A full description of the education of the intervention nurse is reported in the online supplementary materials (Supplementary file 3).

### *Data collection*

Data were collected from September 2020-June 2021. Feasibility outcomes were collected during the whole study period by the intervention nurse and were documented directly after every session in a trial log to secure the data collection<sup>51</sup>. The trial log contained a summary of the results of the feasibility criteria using Excel (Microsoft® Excel, version 16.50).

The three questionnaires were distributed by mail to patients in the control group (between September 2020 and December 2020) and the intervention group (December 2020 and March 2021). These three questionnaires were distributed at baseline, i.e., at the start of the intervention and ET, and three months after the start of the intervention.

The first questionnaire was the GSE, a 10-item (short form) psychometric scale that assesses optimistic self-beliefs to cope with a variety of demands in life. The GSE is a validated instrument that has been translated into Swedish<sup>52</sup> and has previously been used with breast cancer patients<sup>53</sup>. The total score is the mean value of respondents' answers to all items. High scores imply higher self-efficacy.

The second questionnaire was the QPP, a 45-item instrument that measures satisfaction in four dimensions: medical-technical competence, physical-technical conditions, identity-oriented approach, and sociocultural atmosphere<sup>54 55</sup>. Moreover, to identify patients' views of whether the health care was adapted to their needs rather than health care routines, three items (*I was given the possibility to tell the medical staff how I experienced my situation; I was given the opportunity to participate in the planning of my care/treatment; I received the information I needed to be able to participate in decisions about my own care and treatment*) that were previously used by the Swedish SOM Institute were added<sup>56</sup>. To calculate the execution index, each question is scored in terms of actual experience and subjective importance, each on a four-point Likert scale. The execution index score ranges from 1–7, where one is inadequate quality of care from the patient perspective and seven is good quality of care<sup>57</sup>.



1  
2  
3 The last questionnaire was the MSAS, a 32-question instrument for patients to rate their symptoms on  
4 a 5-point Likert scale <sup>58 59</sup>. The instrument has been validated in Swedish breast cancer patients <sup>59</sup> and  
5 has previously been used with breast cancer patients <sup>53</sup>. The total MSAS score is the average of the  
6 symptom scores for all 32 symptoms. Each symptom score is an average of the dimensions and includes  
7 the number of symptoms, how often patients experienced them, the severity of the symptoms and the  
8 cause of distress.  
9  
10  
11  
12

### 13 *Feasibility outcomes*

14 In this study, feasibility outcomes were defined as the primary outcome. Craig et al. (2013) described  
15 several challenging variables that can affect an intervention's results and conclusions. The feasibility  
16 classification (process, resources, scientific) and feasibility criteria reported by Thabane et al. (2019)  
17 and Lancaster et al. (2004) were used to collect feasibility data. Based on the recommendations for  
18 feasibility studies and an expected attrition rate of 20%, the sample size was set to 20 participants in  
19 each group <sup>60</sup>. To determine whether the chosen feasibility criteria were successful <sup>61</sup>, criteria for success  
20 were stated according to the CONSORT 2010 statement <sup>34</sup>.  
21  
22  
23  
24  
25  
26  
27

28 The intervention process was assessed with the feasibility criteria as follows:

- 29 1. Recruitment was studied to determine whether the patients were willing to participate in this  
30 study. It has been suggested that the loss of participants should be less than 15% <sup>62</sup>. The criterion  
31 was determined to be successful if the percentage rates of recruitment were > 70%.  
32
- 33 2. Retention was studied to determine whether the patients were willing to remain for the entire  
34 study period, i.e., 12 weeks. The criterion was determined to be successful if the percentage  
35 rates of retention were >70%.  
36
- 37 3. Compliance with the intervention protocol was studied to determine if the patients were offered  
38 the three parts of the planned intervention, i.e., education materials, learning plan and  
39 personalized letter. The criterion was determined to be successful if all three parts of the  
40 intervention were offered.  
41  
42  
43  
44  
45  
46

47 The resources used in the intervention were assessed with the feasibility criteria as follows:

- 48 4. The form of educational support was studied to determine the preferred form of educational  
49 support during the intervention period, i.e., 12 weeks. The criterion was determined to be  
50 successful if one of the three forms of educational support (face-to face, telephone, and digital)  
51 were requested by the patients.  
52
- 53 5. The number of educational sessions was studied to determine how many educational  
54 opportunities the patient used during the intervention period, i.e., 12 weeks. The criterion was  
55 determined to be successful if no more than four education sessions were used by each patient.  
56  
57  
58  
59  
60



6. The length per education session was studied to determine how much time the patient spent in each education session. The criterion was determined to be successful if < 45 minutes was used per education session. The time was clocked by the intervention nurse.
7. The length between each education session was studied to determine how often women wanted to have education opportunities. The criterion was determined to be successful if there were no more than four weeks between each education session.
8. The distribution of education materials was studied to determine how much intervention materials the patients received during the study. The criterion was determined to be successful if the distribution of education materials was >70%.

The scientific challenges of the intervention were assessed with the following feasibility criteria:

9. The completion rate of questionnaires was studied to determine if the patient was willing to answer the questionnaires, i.e., at baseline and 12 weeks. The criterion was determined to be successful if the percentage rates of patient completion of questionnaires were > 70% at baseline and 12 weeks.
10. The estimated treatment effect was studied to determine if the selected instruments were appropriate to measure patients' self-efficacy, quality of care, and symptoms. The criterion was determined to be successful if there were any changes in the self-report measures between the first and second points of measurement.

Patients included in the study responded to the questionnaires and returned the questionnaires in a prepaid envelope.

### **Analysis**

To analyze demographic variables, we used descriptive statistics (numbers, percentages, means, ranges). We calculated the percentage rates of recruitment, retention, and completion of questionnaires. We calculated the number, median and range of educational sessions, distribution of education materials, length per education session, and length between each education session. As the study was a feasibility test, no hypothesis testing was applied<sup>63</sup>, but p values were calculated and presented to evaluate their relevance in a forthcoming RCT. Descriptive statistical analyses and the Mann–Whitney U test were performed to identify the experience of symptoms, satisfaction with care and perceived self-efficacy. P values below .05 were considered statistically significant, and all analyses were performed with IBM® SPSS® Statistics version 27 (IBM SPSS Statistics for Macintosh, Version 27.0).

## RESULTS

### *Participant demographics*

In the control group, the median age was 65 years, 80% of the participants were born in Sweden, 63% were cohabiting and 45% were prescribed tamoxifen. In the intervention group, the median age was 66 years, 86% were born in Sweden, 76% were cohabiting and 43% were prescribed tamoxifen (Table 1).

### *Feasibility classification and criteria*

Feasibility outcomes are presented in line with the CONSORT 2010 statement as follows:

#### *1. Recruitment*

In the control group, 22 eligible patients were screened, and 20 were approached at the clinic, of whom 20 consented to participate (100%). In the intervention group, 44 patients were screened, of whom 24 were approached and 21 consented to participate (88%) (Table 1), and patients were enrolled from December 2020-April 2021. Of the three patients who did not consent to participate in the intervention group, two indicated the number of questions in the questionnaires to be a reason for not participating. One patient gave no reason for not participating.

#### *2. Retention*

In the intervention group, 20 patients completed the questionnaire (95%). One patient dropped out from the intervention because the study reminded her about breast cancer surgery, which she was trying to forget.

#### *3. Compliance with the intervention protocol*

In the first session, the patients' needs for knowledge and understanding, resources, goals and support from the contact nurse were identified in their narratives. Education material was offered accordingly using a written agreement between the patient and contact nurse and documented in the ILP. Patients decided with the contact nurse whether they needed knowledge. If they needed knowledge, they stated when they wanted the education materials and which parts. Their need for knowledge ranged between having everything sent after the first session and having some of the education material sent at the end of the intervention. Patients could state that they did not want any education material at the start of the intervention but would reevaluate their needs during the 12 weeks of the intervention. However, since the ILP was sent home with the patients, any changes in the plan had to be documented by the patient herself. Two patients received the education materials sent to them but did not want to read it, just to have it if they wanted to read it later. Seven patients did not want the intervention for the full 12-week

1  
2  
3 period (33%) but stated that they would make contact if they needed further information during the  
4 intervention. One patient wanted her partner to be included. Two patients in the intervention group did  
5 not answer the telephone at the scheduled session, making the call attendance 90%. One patient  
6 rescheduled a session for personal reasons. Thirty-three percent of the patients did not want follow-up  
7 sessions during the full 12-week intervention. As 90% of the patients wanted all educational materials,  
8 10% of the patients used only the contact nurse for support, and one hundred percent of the patients  
9 received a personalized reminder letter (Table 2).

10  
11  
12 Contact information and an invitation for patients (100%) to make contact if needed were sent after 12  
13 weeks in the personalized letter. None of the patients made contact after the 12-week intervention, as  
14 shown in Table 2.

#### 15 16 17 18 19 *4. Resources*

20  
21 None of the patients wanted to have face-to-face sessions as educational support. In fact, several of the  
22 patients stated that it was important to not have to come for appointments at the hospital. Reasons for  
23 not wanting to come to the hospital were related to the COVID-19 pandemic as well as to perceptions  
24 of appointments at the hospital being time consuming. All patients but one preferred telephone sessions.  
25 If a patient had asked for a face-to-face follow-up session, this would have been managed accordingly,  
26 with arrangements made to ensure safety in the context of the COVID-19 pandemic. Face-to-face  
27 meetings at the hospital with patients were not prohibited but restricted. However, no patient-contact  
28 nurse pairs participated in a face-to-face session; had they done so, both the patient and the contact nurse  
29 would have had to wear face masks, and the contact nurse would have also had to wear a plastic face  
30 shield to prevent transmission of the COVID-19 virus.

#### 31 32 33 34 35 36 37 *5. Number of educational sessions*

38 The number of educational sessions ranged between two and four sessions (Table 2).

#### 39 40 41 42 43 44 45 46 47 48 49 50 51 52 53 54 55 56 57 58 59 60 *6. Length per education session*

Telephone support sessions ranged between 5 and 60 minutes, and digital support sessions ranged  
between 30 and 45 minutes (Table 2) and were clocked by the intervention nurse.

#### *7. Length between education sessions*

The length between follow-up sessions ranged between 1 and 6 weeks (Table 2).

#### *8. Distribution of education materials*

All patients (100%) wanted part 1 of the individual education material. A further description of the  
distribution is shown in Table 2.

#### *9. Completion rate of questionnaires*

In the control group, 95% completed the first questionnaires at baseline, as one patient questionnaire  
was lost in the mail. At three months, 95% of patients responded to their surveys. In the intervention  
group, 100% responded to the first questionnaires, and 86% responded to the follow-up questionnaires  
after three months. At the first measurement point, two reminder messages were sent to three patients  
in the intervention group before one patient was recorded as a drop out. At the second measurement

point, one reminder message was sent to six patients three weeks after the questionnaires were sent. A second reminder message was sent approximately two weeks later to five patients, and as two patients did not return their questionnaires, they were recorded as drop-outs. Two patients in the intervention group did not answer the telephone at the scheduled session, making the call attendance 90%. One patient rescheduled a session for personal reasons.

#### 10. Estimated treatment effect

Differences between the control and intervention groups in perceived self-efficacy (0.5 and 0,  $p=0.731$ ) and reported number of symptoms according to the MSAS (2 and 1,  $p=0.724$ ) after 3 months were observed (Figure 2). Median differences at baseline and 3 months in the control group and intervention group are also reported in the online supplementary materials (Supplementary file 4).

Quality of care was measured using the QPP, and these results are shown in the online supplementary materials (Supplementary file 5). Overall, the patients in the control group had higher quality of care index scores than patients in the intervention group.

Table 2. Resource needs for the intervention

| <b>RESPECT</b>                                                                                           |            |
|----------------------------------------------------------------------------------------------------------|------------|
| <b>Distributed educational material</b>                                                                  |            |
| Individual educational material <i>Part 1</i> , <i>n</i>                                                 | 21         |
| Individual educational material <i>Part 2</i> , <i>n</i>                                                 | 20         |
| Individual educational material <i>Part 3</i> , <i>n</i>                                                 | 19         |
| Individual educational material <i>Part 4</i> , <i>n</i>                                                 | 19         |
| Individual educational material<br><i>Information about tamoxifen or aromatase inhibitors</i> , <i>n</i> | 20         |
| Additional educational material from patient needs:                                                      |            |
| Complementary medicine, <i>n</i>                                                                         | 1          |
| Sleep advice, <i>n</i>                                                                                   | 1          |
| Recommendations about internet sites:                                                                    |            |
| Sleep advice, <i>n</i>                                                                                   | 2          |
| <b>Form of education and educational sessions per patient</b>                                            |            |
| Face to face ( $n=0$ ), median (range)                                                                   | 0 (-)      |
| Telephone ( $n=20$ ), median (range)                                                                     | 3 (2-4)    |
| Digital ( $n=1$ ), median (range)                                                                        | 1 (1)      |
| <b>Length (minutes) per session</b>                                                                      |            |
| Telephone ( $n=20$ ), median (range)                                                                     | 20 (5-60)  |
| Digital ( $n=1$ ), median (range)                                                                        | 30 (30-45) |
| <b>Length of time (weeks) between each session</b>                                                       |            |
| Telephone follow-up education sessions, weeks, median (range)                                            | 4 (1-6)    |
| Digital meeting follow-up sessions, weeks, median (range)                                                | 4 (-)      |
| <i>Follow-up educational session</i>                                                                     |            |
| Time from 1 <sup>st</sup> session to 2 <sup>nd</sup> session, weeks, median (range)                      | 2 (1-8)    |
| Time from 2 <sup>nd</sup> session to 3 <sup>rd</sup> session, weeks, median (range)                      | 4 (2-8)    |
| Time from 3 <sup>rd</sup> session to 4 <sup>th</sup> session, weeks, median (range)                      | 4 (2-5)    |

Please insert Figure 2 about here

## DISCUSSION

The results show that the intervention was feasible regarding the classification process and resources. However, it was less feasible regarding scientific challenges. The recruitment methods used seem to be accurate and feasible for an RCT with the aim of empowering patients prescribed ET to manage ET-related symptoms and problems. As a before-and-after design was used, the risk of contamination between groups was minor, as the intervention nurse had minor clinical contact with the control group.

The most common problems reported by trial investigators were a lack of adherence to the trial protocol, difficulties with recruitment, data collection and the intervention itself <sup>64</sup>; however, during the intervention, the contact nurse succeeded in adhering to the trial protocol. Moreover, a weakness in interventions has been reported to be a lack of a theoretical approach <sup>65</sup>; to address this challenge, the present study was founded on a theoretical model <sup>47</sup>. Modeling was used to identify pit falls and barriers <sup>66</sup>. The contact nurse in the intervention pretested the intervention protocol in clinical meetings with patients before launching the support program. It is crucial for health care professionals to have deep insight into the theory and selected methods to increase patients' required knowledge about ET since no one will adhere to a protocol if the protocol is of no significance <sup>48</sup>. Moreover, a health care context is referred to as a complex adaptive system, as it contains a collection of individuals with the freedom to act in a way that is not always predictable and changes depending on the context. Moreover, a complex adaptive system has fuzzy boundaries, and health care professionals' priorities depend on, for example, their private lives and things they would not sacrifice to follow a study protocol <sup>67</sup>. These challenges need to be addressed, as the intervention is to be applied in a care setting.

Furthermore, as the follow-up is flexible and the patients decided, in a partnership with the contact nurse, how many educational sessions were needed, the patient's individuality and resources were a focus, and no patient needed to acquire education than necessary. This needed flexibility is another component making the intervention a complex intervention. Moreover, the COVID-19 pandemic has increased the use of digital follow-up, which seems to be well liked among patients <sup>68-70</sup>. Furthermore, face-to-face sessions were not prohibited during the intervention but were restricted due to the COVID-19 pandemic. If a patient would have asked for a face-to-face session, this would have been managed to not put the patient, fellow patients, or the contact nurse or other health care professionals in danger. However, we cannot specifically state that patients would prefer telephone sessions under other circumstances, but telephone follow-up seems to be suitable, as patients indicated physical appointments to be time

1  
2  
3 consuming. A previous study also used telephone follow-up to increase confidence in controlling illness  
4 in patients with chronic obstructive pulmonary disease with positive results in controlling symptoms  
5 ( $p=.028$ )<sup>71</sup>, and telephone follow-ups were found to be well liked among registered nurses<sup>72</sup>. A previous  
6 study using PCC also allowed patients to decide the number of follow-up sessions<sup>73</sup>. Thus, this approach  
7 could be a preferable way to administer the intervention and could also be more cost-effective, as  
8 patients do not need to attend more sessions than needed; however, it needs to be evaluated further.  
9 Furthermore, not all health care professionals have a PCC approach, which might affect the responses  
10 to the questionnaires and the interpretation of the results. To manage this, the whole care chain needs to  
11 structure its work according to PCC, as in a previous study<sup>24</sup>.

12  
13  
14  
15  
16  
17  
18 Moreover, the intervention protocol ranged over 12 weeks, as this period has been identified as the most  
19 troublesome for patients with ET<sup>74</sup>, and a previous study identified that the start of the ET period could  
20 be preferable for an intervention<sup>35</sup>. As 67% of the patients wanted education during the full 12-week  
21 intervention, 12 weeks is indicated to be a suitable length for a support program in a future RCT.  
22 However, an optional follow-up session after six months, when the patients have more experience with  
23 ET, could be appropriate, but measures would need to be taken to help patients stay focused on ET when  
24 responding to the questionnaires. A later session could also be preferable for patients who do not want  
25 to be educated during the first months undergoing ET<sup>35</sup>.

26  
27  
28  
29  
30  
31  
32 To address scientific challenges, two measurement points were used, baseline and three months after  
33 being prescribed ET. In an RCT, additional measurement points could be added at six and 12 months.  
34 However, there were no differences in self-efficacy between the control and intervention groups; rather,  
35 both the control group and the intervention had high self-efficacy scores at baseline, indicating that the  
36 ceiling level was reached. Higher education implies higher self-efficacy<sup>75</sup> ( $p=.017$ )<sup>76</sup>. In the present  
37 study, 45% of the patients in the control group and 48% of the patients in the intervention group had  
38 university education, indicating that the GES may not be suitable as an instrument. General self-efficacy  
39 has been increased using PCC in a previous study in patients with acute coronary syndrome<sup>73</sup>, indicating  
40 that breast cancer patients could also benefit from PCC. This is of importance, as low self-efficacy has  
41 been identified as a predictor of terminating ET prematurely<sup>77</sup> due to beliefs about its low influence on  
42 health or low satisfaction with involvement in health care<sup>77</sup>.

43  
44  
45  
46  
47  
48  
49  
50  
51 The study had some limitations. As the COVID-19 pandemic was ongoing, there were restrictions on  
52 the patients' ability to have face-to-face sessions with the trial leader. However, several patients stated  
53 that they would participate only if there were no mandatory sessions at the hospital. The patients also  
54 had the possibility of having their sessions using a digital conference system. As the intervention contact  
55 nurse and the participants almost never met in person, their relationships could have been affected.  
56 However, a partnership was established between the patient and the trial leader using a PCC protocol.  
57 This might have decreased the effect of not meeting in person. In a future RCT, it will be crucial for  
58  
59  
60



1  
2  
3 patients to have face-to-face relationships with the intervention contact nurse with whom they will build  
4 partnerships. This study did not identify when the intervention should stop, as it was decided before the  
5 intervention that it should last for 12 weeks. It might have been important for the patients in the  
6 intervention to have given this important information. However, seven of the 21 patients did not use the  
7 full 12-week intervention, which implies that a 12-week support program is suitable. No patient actively  
8 asked for longer follow-up. All patients were allocated a contact nurse whom they could contact after  
9 the intervention if further questions were answered.  
10  
11  
12  
13  
14

## 15 **Conclusion**

16 This intervention seems to be feasible regarding its process and resources and acceptable among  
17 patients, as 95% completed the 12-week support program and 86% responded to the three-month  
18 questionnaire. A telephone follow-up intervention seems to be the preferable way to administer the  
19 intervention. However, for self-efficacy and symptoms, there were no differences in effect size between  
20 the control and intervention groups, indicating that the intervention was less feasible regarding scientific  
21 challenges.  
22  
23  
24  
25  
26  
27

## 28 *Ethical approval*

29 Patients were informed that their participation was voluntary and could be terminated at any time  
30 without consequences. They were also assured that their confidentiality would be respected throughout  
31 the research process. This study was approved by the Swedish Ethical Review Authority (approval no  
32 2020-03239).  
33  
34  
35

## 36 *Conflicts of Interest*

37 The authors report no conflicts of interest.  
38

## 39 *Contributorship statement*

40 IH, SAK, ROB, CW: Conceptualization and design, IH, SAK, CW: Methodology, SAK: Data  
41 collection, IH, SAK, CW, ROB, Formal analysis: IH, SAK, CW, ROB: Visualization, IH, SAK, CW,  
42 ROB: Writing—review and editing.  
43  
44

## 45 *Data availability statement*

46 Data are available upon reasonable request.  
47

## 48 *Source of Funding*

49 Susanne Ahlstedt Karlsson has received honoraria from the R&D Council in Gothenburg and Bohuslän  
50 (VGFOUGSB-932984). Ingela Henoeh is currently receiving a grant from the Bröstcancerförbundet,  
51 grant number N/A. The remaining authors have no funding sources to declare. The authors have no  
52 conflicts of interest to disclose.  
53  
54  
55

## 56 *Acknowledgments*

57  
58  
59  
60

We thank all patients for sharing their personal experiences of life with ET. We would also like to thank the staff of the surgical outpatient care unit for contributing to finding eligible patients to include in this study.

## References

1. Davies C, Godwin J, Gray R, et al. Relevance of breast cancer hormone receptors and other factors to the efficacy of adjuvant tamoxifen: patient-level meta-analysis of randomised trials. *Lancet* 2011;378(9793):771-84. doi: 10.1016/S0140-6736(11)60993-8
2. Berkowitz MJ, Thompson, C. K., Zibecchi. L.T., Lee, M.K., Streja, E., Berkowitz. J.S., Wenziger. C. M, Bake. J.L., Di Nome. M.L., Attai. D.J. How patients experience endocrine therapy for breast cancer: an online survey of side effects, adherence, and medical team support. *Journal of Cancer Survivorship* 2020;15:29–39. doi: 10.1007/s11764-020-00908-5.
3. Ahlstedt Karlsson, Wallengren C, Olofsson Bagge R, et al. Women's coping strategies during the first three months of adjuvant endocrine therapy for breast cancer. *Nurs Open* 2019;7(2):605 - 12. doi: 10.1002/nop2.430. [published Online First: 2020/02/25]
4. Moon, Hunter MS, Moss-Morris R, et al. Factors related to the experience of menopausal symptoms in women prescribed tamoxifen. *J Psychosom Obstet Gynaecol* 2017;38(3):226 - 35. doi: 10.1080/0167482X.2016.1216963. [published Online First: 2016/09/02]
5. Nabieva N, Fehm T, Haberle L, et al. Influence of side-effects on early therapy persistence with letrozole in post-menopausal patients with early breast cancer: Results of the prospective EvAluate-TM study. *Eur J Cancer* 2018;96:82 - 90. doi: 10.1016/j.ejca.2018.03.020. [published Online First: 2018/04/22]
6. Bluethmann SM, Murphy CC, Tiro JA, et al. Deconstructing decisions to initiate, maintain, or discontinue adjuvant endocrine therapy in breast cancer survivors: A mixed-methods study. *Oncol Nurs Forum* 2017;44(3):E101–E110. doi: 10.1188/17.ONF.E101-E110. [published Online First: 2017/06/22]
7. Cavazza M, Banks H, Ercolanoni M, et al. Factors influencing adherence to adjuvant endocrine therapy in breast cancer-treated women: using real-world data to inform a switch from acute to chronic disease management. *Breast Cancer Res Treat* 2020;183:189–99. doi: 10.1007/s10549-020-05748-6. [published Online First: 2020/06/28]
8. Shinn EH, Broderick G, Fellman B, et al. Simulating time-dependent patterns of nonadherence by patients with breast cancer to adjuvant oral endocrine therapy. *JCO Clin Cancer Inform* 2019;3:1 - 9. doi: 10.1200/CCI.18.00091. [published Online First: 2019/04/20]
9. Di Meglio A, Soldato D, Presti D, et al. Lifestyle and quality of life in patients with early-stage breast cancer receiving adjuvant endocrine therapy. *Curr Opin Oncol* 2021 doi: 10.1097/CCO.0000000000000781 [published Online First: 2021/08/31]
10. Ahlstedt Karlsson S, Hensch I, Olofsson Bagge R, et al. An intervention mapping-based support program that empowers patients with endocrine therapy management. *Evaluation and Program Planning* 2022:102071. doi: <https://doi.org/10.1016/j.evalprogplan.2022.102071>
11. Moon, Moss-Morris R, Hunter MS, et al. Development of a self-management intervention to improve tamoxifen adherence in breast cancer survivors using an Intervention Mapping framework. *Support Care Cancer* 2020 doi: 10.1007/s00520-020-05850-x. [published Online First: 2020/10/30]
12. Kim SH, Park S, Kim SJ, et al. Self-management Needs of Breast Cancer Survivors After Treatment: Results From a Focus Group Interview. *Cancer Nurs* 2020;43(1):78-85. doi: 10.1097/NCC.0000000000000641. [published Online First: 2018/08/28]



13. Shelby RA, Dorfman CS, Bosworth HB, et al. Testing a behavioral intervention to improve adherence to adjuvant endocrine therapy (AET). *Contemp Clin Trials* 2019;76:120-31. doi: 10.1016/j.cct.2018.11.010 [published Online First: 2018/11/26]
14. Duijts SF, van Beurden M, Oldenburg HS, et al. Efficacy of cognitive behavioral therapy and physical exercise in alleviating treatment-induced menopausal symptoms in patients with breast cancer: results of a randomized, controlled, multicenter trial. *J Clin Oncol* 2012;30(33):4124-33. doi: 10.1200/JCO.2012.41.8525 [published Online First: 2012/10/10]
15. Roberts KE, Rickett K, Feng S, et al. Exercise therapies for preventing or treating aromatase inhibitor-induced musculoskeletal symptoms in early breast cancer. *Cochrane Database Syst Rev* 2020;1:CD012988. doi: 10.1002/14651858.CD012988.pub2 [published Online First: 2020/01/30]
16. McLaughlin Renpenning KT, S, G. Self-Care Theory in Nursing. Selected Papers of Dorothea Orem. *New York Springer Publishing Company* 2003
17. Richard AA, Shea K. Delineation of self-care and associated concepts. *J Nurs Scholarsh* 2011;43(3):255-64. doi: 10.1111/j.1547-5069.2011.01404.x [published Online First: 2011/09/03]
18. Denyes MJ, Orem DE, Bekel G, et al. Self-care: a foundational science. *Nurs Sci Q* 2001;14(1):48-54. doi: 10.1177/089431840101400113 [published Online First: 2002/03/05]
19. Ekman I, Swedberg K, Taft C, et al. Person-centered care--ready for prime time. *Eur J Cardiovasc Nurs* 2011;10(4):248-51. doi: 10.1016/j.ejcnurse.2011.06.008. [published Online First: 2011/07/19]
20. Bag E, Mollaoglu M. The evaluation of self-care and self-efficacy in patients undergoing hemodialysis. *J Eval Clin Pract* 2010;16(3):605-10. doi: 10.1111/j.1365-2753.2009.01214.x [published Online First: 2009/10/31]
21. Toivonen KI, Williamson TM, Carlson LE, et al. Potentially Modifiable Factors Associated with Adherence to Adjuvant Endocrine Therapy among Breast Cancer Survivors: A Systematic Review. *Cancers (Basel)* 2020;13(1) doi: 10.3390/cancers13010107 [published Online First: 2021/02/10]
22. Moon, Moss-Morris R, Hunter MS, et al. Barriers and facilitators of adjuvant hormone therapy adherence and persistence in women with breast cancer: a systematic review. *Patient Prefer Adherence* 2017;11:305-22. doi: 10.2147/PPA.S126651 [published Online First: 2017/03/07]
23. Bandura A. Self-efficacy. The exercise of control. *WH Freeman New York* 1997
24. Fors A, Taft C, Ulin K, et al. Person-centred care improves self-efficacy to control symptoms after acute coronary syndrome: a randomized controlled trial. *Eur J Cardiovasc Nurs* 2016;15(2):186-94. doi: 10.1177/1474515115623437 [published Online First: 2015/12/25]
25. Ali L, Wallstrom S, Ekman I, et al. Effects of person-centered care via telephone on self-efficacy in patients with chronic obstructive pulmonary disease: a subgroup analysis of a randomized controlled trial. *Nursing Open* 2020 doi: 10.1002/nop2.701
26. Wolf A, Fors A, Ulin K, et al. An eHealth Diary and Symptom-Tracking Tool Combined With Person-Centered Care for Improving Self-Efficacy After a Diagnosis of Acute Coronary Syndrome: A Substudy of a Randomized Controlled Trial. *J Med Internet Res* 2016;18(2):e40. doi: 10.2196/jmir.4890 [published Online First: 2016/02/26]
27. Wittenberg E, Goldsmith J, Parnell TA. Development of a communication and health literacy curriculum: Optimizing the informal cancer caregiver role. *Psychooncology* 2020;29(4):766-74. doi: 10.1002/pon.5341 [published Online First: 2020/01/31]
28. Bernier MJ. Developing and evaluating printed education materials: a prescriptive model for quality. *Orthop Nurs* 1993;12(6):39-46. doi: 10.1097/00006416-199311000-00008 [published Online First: 1993/11/01]
29. Hoffmann, Worrall L. Designing effective written health education materials: considerations for health professionals. *Disabil Rehabil* 2004;26(19):1166 - 73. doi: 10.1080/09638280410001724816. [published Online First: 2004/09/17]
30. Swedish Government Official Reports SOU, (in Swedish). En nationell cancerstrategi för framtiden 11., 2009.

31. Pautasso FF, Zelmanowicz AM, Flores CD, et al. Role of the Nurse Navigator: integrative review. *Rev Gaucha Enferm* 2018;39:e20170102. doi: 10.1590/1983-1447.2018.2017-0102 [published Online First: 20180723]
32. Westman B, Ullgren H, Olofsson A, et al. Patient-reported perceptions of care after the introduction of a new advanced cancer nursing role in Sweden. *Eur J Oncol Nurs* 2019;41:41-48. doi: 10.1016/j.ejon.2019.05.009 [published Online First: 20190601]
33. Hoffmann, Glasziou PP, Boutron I, et al. Better reporting of interventions: template for intervention description and replication (TIDieR) checklist and guide. *BMJ* 2014;348:g1687. doi: 10.1136/bmj.g1687 [published Online First: 2014/03/13]
34. Eldridge SM, Chan CL, Campbell MJ, et al. CONSORT 2010 statement: extension to randomised pilot and feasibility trials. *Pilot Feasibility Stud* 2016;2:64. doi: 10.1186/s40814-016-0105-8 [published Online First: 2016/12/15]
35. Moon, Moss-Morris., Hunter, et al. Acceptability and feasibility of a self-management intervention for women prescribed tamoxifen. *Health Education Journal* 2019;78(8) 901 - 15. doi: 10.1177/0017896919853856
36. Craig P, Dieppe P, Macintyre S, et al. Developing and evaluating complex interventions: the new Medical Research Council guidance. *Int J Nurs Stud* 2013;50(5):587 - 92. doi: 10.1016/j.ijnurstu.2012.09.010. [published Online First: 2012/11/20]
37. Moore GF, Evans RE, Hawkins J, et al. From complex social interventions to interventions in complex social systems: Future directions and unresolved questions for intervention development and evaluation. *Evaluation (Lond)* 2019;25(1):23-45. doi: 10.1177/1356389018803219 [published Online First: 20181031]
38. Skivington K, Matthews L, Simpson SA, et al. A new framework for developing and evaluating complex interventions: update of Medical Research Council guidance. *BMJ* 2021;374:n2061. doi: 10.1136/bmj.n2061 [published Online First: 20210930]
39. Sedgwick P. Before and after study designs. *BMJ* 2014;349:g5074. doi: 10.1136/bmj.g5074 [published Online First: 2014/08/12]
40. Patient Act. SFS 2014:821(2014:82) Assessed 21-05-18.
41. Schober M, Lehwaldt D, Rogers M, et al. Guidelines on advanced practice nursing. 2020
42. Kerr H, Donovan M, McSorley O. Evaluation of the role of the clinical Nurse Specialist in cancer care: an integrative literature review. *Eur J Cancer Care (Engl)* 2021;30(3):e13415. doi: 10.1111/ecc.13415 [published Online First: 20210126]
43. <http://www.1177.se>. Sjukdomar & besvär/Cancer/ Råd och stöd vid cancerKontaktsjuksköterskan – ditt stöd i vården vid cancer (21-07-21).
44. Granger BB, Britten N, Swedberg K, et al. Dumping adherence: a person-centred response for primary care. *Fam Pract* 2020;37(6):862 - 64. doi: 10.1093/fampra/cmaa060. [published Online First: 2020/06/27]
45. Higgins A, Nicholl H. The experiences of lecturers and students in the use of microteaching as a teaching strategy. *Nurse Educ Pract* 2003;3(4):220-7. doi: 10.1016/S1471-5953(02)00106-3 [published Online First: 2008/11/29]
46. Remesh A. Microteaching, an efficient technique for learning effective teaching. *J Res Med Sci* 2013;18(2):158-63. [published Online First: 2013/08/06]
47. Ahlstedt Karlsson, Henoeh I, Olofsson Bagge R, et al. An intervention mapping-based support program that empowers patients with endocrine therapy management, submitted.
48. Dewey J. Democracy and Education. 2016
49. Ekman I. Personcentering inom hälso- och sjukvård. Från filosofi till praktik. *Liber AB* 2014
50. O'Neill GM, T. . STUDENT-CENTRED LEARNING: WHAT DOES IT MEAN FOR STUDENTS AND LECTURERS? . In: *Emerging Issues in the Practice of University Learning and Teaching* 2005
51. Lancaster GA, Dodd S, Williamson PR. Design and analysis of pilot studies: recommendations for good practice. *J Eval Clin Pract* 2004;10(2):307-12. doi: 10.1111/j..2002.384.doc.x [published Online First: 2004/06/11]
52. Love J, Moore CD, Hensing G. Validation of the Swedish translation of the General Self-Efficacy scale. *Qual Life Res* 2012;21(7):1249-53. doi: 10.1007/s11136-011-0030-5 [published Online First: 2011/10/11]

53. Thieme M, Einkenkel J, Zenger M, et al. Optimism, pessimism and self-efficacy in female cancer patients. *Jpn J Clin Oncol* 2017;47(9):849-55. doi: 10.1093/jjco/hyx079 [published Online First: 2017/06/08]
54. Wilde B, Starrin B, Larsson G, et al. Quality of care from a patient perspective--a grounded theory study. *Scand J Caring Sci* 1993;7(2):113-20. doi: 10.1111/j.1471-6712.1993.tb00180.x [published Online First: 1993/01/01]
55. Wilde-Larsson B, Larsson G. Patients' views on quality of care and attitudes towards re-visiting providers. *Int J Health Care Qual Assur* 2009;22(6):600-11. doi: 10.1108/09526860910986867 [published Online First: 2009/12/05]
56. Wallström SE, I; Taft,C. Svenskarnas syn på personcentrering i vården. *SOM-institutets sjuttonde forskarantologi (red Andersson, Ohlsson, Oscarsson och Oskarsson)* 2017
57. Wilde-Larsson B, Larsson G. Reviderat åtgärdsindex. Pm 2016:1. *Improveit Digital Solutions AB, Halmstad, Sweden* 2016
58. Portenoy RK, Thaler HT, Kornblith AB, et al. The Memorial Symptom Assessment Scale: an instrument for the evaluation of symptom prevalence, characteristics and distress. *Eur J Cancer* 1994;30A(9):1326-36. doi: 10.1016/0959-8049(94)90182-1 [published Online First: 1994/01/01]
59. Browall M, Kenne Sarenmalm E, Nasic S, et al. Validity and reliability of the Swedish version of the Memorial Symptom Assessment Scale (MSAS): an instrument for the evaluation of symptom prevalence, characteristics, and distress. *J Pain Symptom Manage* 2013;46(1):131-41. doi: 10.1016/j.jpainsymman.2012.07.023 [published Online First: 2012/12/01]
60. Julious SA. Sample size of 12 per group rule of thumb for a pilot study. *Pharmaceut Statist* 2005(4): 287-91. doi: 10.1002/pst.185
61. Thabane L, Lancaster G. A guide to the reporting of protocols of pilot and feasibility trials. *Pilot Feasibility Stud* 2019;5:37. doi: 10.1186/s40814-019-0423-8 [published Online First: 20190228]
62. Zelle DM, Kok T, Dontje ML, et al. The role of diet and physical activity in post-transplant weight gain after renal transplantation. *Clin Transplant* 2013;27(4):E484-90. doi: 10.1111/ctr.12149 [published Online First: 20130613]
63. Eldridge SM, Lancaster GA, Campbell MJ, et al. Defining Feasibility and Pilot Studies in Preparation for Randomised Controlled Trials: Development of a Conceptual Framework. *PLoS One* 2016;11(3):e0150205. doi: 10.1371/journal.pone.0150205 [published Online First: 2016/03/16]
64. Eldridge SM, Ashby D, Feder GS, et al. Lessons for cluster randomized trials in the twenty-first century: a systematic review of trials in primary care. *Clin Trials* 2004;1(1):80-90. doi: 10.1191/1740774504cn006rr [published Online First: 2005/11/12]
65. Heiney SP, Parker PD, Felder TM, et al. A systematic review of interventions to improve adherence to endocrine therapy. *Breast Cancer Res Treat* 2019;173(3):499-510. doi: 10.1007/s10549-018-5012-7 [published Online First: 2018/11/06]
66. Rowlands G, Sims J, Kerry S. A lesson learnt: the importance of modelling in randomized controlled trials for complex interventions in primary care. *Fam Pract* 2005;22(1):132-9. doi: 10.1093/fampra/cmh704 [published Online First: 2005/01/11]
67. Plsek PE, Greenhalgh T. Complexity science: The challenge of complexity in health care. *BMJ* 2001;323(7313):625-8. doi: 10.1136/bmj.323.7313.625 [published Online First: 2001/09/15]
68. Gunasekeran DV, Tham YC, Ting DSW, et al. Digital health during COVID-19: lessons from operationalising new models of care in ophthalmology. *Lancet Digit Health* 2021;3(2):e124-e34. doi: 10.1016/S2589-7500(20)30287-9 [published Online First: 2021/01/30]
69. Budd J, Miller BS, Manning EM, et al. Digital technologies in the public-health response to COVID-19. *Nat Med* 2020;26(8):1183-92. doi: 10.1038/s41591-020-1011-4 [published Online First: 2020/08/10]
70. Vargo D, Lin, Z., Benwell, B., Zheng, Y. Digital technology use during COVID-19 pandemic: A rapid review. *Human Behavior and Emerging Technologies* 2021;3(1):13-24. doi: 10.1002/hbe2.242
71. Ali L, Wallstrom S, Ekman I, et al. Effects of person-centred care via telephone on self-efficacy in patients with chronic obstructive pulmonary disease: Subgroup analysis of a randomized

- controlled trial. *Nurs Open* 2021;8(2):927-35. doi: 10.1002/nop2.701 [published Online First: 2021/02/12]
72. Bostrom E, Ali L, Fors A, et al. Registered nurses' experiences of communication with patients when practising person-centred care over the phone: a qualitative interview study. *BMC Nurs* 2020;19:54. doi: 10.1186/s12912-020-00448-4 [published Online First: 2020/06/25]
73. Fors A, Ekman I, Taft C, et al. Person-centred care after acute coronary syndrome, from hospital to primary care - A randomised controlled trial. *Int J Cardiol* 2015;187:693-9. doi: 10.1016/j.ijcard.2015.03.336 [published Online First: 2015/04/29]
74. Fontein DB, Nortier JW, Liefers GJ, et al. High non-compliance in the use of letrozole after 2.5 years of extended adjuvant endocrine therapy. Results from the IDEAL randomized trial. *Eur J Surg Oncol* 2012;38(2):110-7. doi: 10.1016/j.ejso.2011.11.010 [published Online First: 2011/12/17]
75. Foster C, Breckons M, Cotterell P, et al. Cancer survivors' self-efficacy to self-manage in the year following primary treatment. *J Cancer Surviv* 2015;9(1):11-9. doi: 10.1007/s11764-014-0384-0 [published Online First: 2014/07/17]
76. Sherer M, Maddux, J. E., Mercandante, B., Prentice-Dunn, S., Jacobs, B., & Rogers, R. W. . The self-efficacy scale: Construction and validation. . *Psychological reports* 1982;51(2):663-71.
77. Lambert LK, Balneaves LG, Howard AF, et al. Understanding adjuvant endocrine therapy persistence in breast Cancer survivors. *BMC Cancer* 2018;18(1):732. doi: 10.1186/s12885-018-4644-7 [published Online First: 2018/07/13]

Figure 1. The care and measurement chain for the control and intervention groups. Both groups received the content in the blue area (usual care).

Abbreviations: Endocrine therapy: ET, Individualized learning plan: ILP.

Figure 2. Baseline and 3-month difference measures in the control and intervention groups for self-efficacy and reported symptoms.

Abbreviations: no: number of symptoms, SE: self-efficacy, Often: how often the patient had a symptom, Severe: how severe the symptom usually experienced by the patient was, Distress: how much the experienced symptom distressed or bothered the patient.

Supplementary material:

Supplementary file 1. Retention - CONSORT flow diagram for the usual care group. Patients included September 2020-December 2021.

Supplementary file 2. Retention - CONSORT flow diagram for the person-centered support program group. Patients included December 2020-March 2021.

Supplementary file 3. Description of the education of the intervention nurse.

Supplementary file 4. Median differences at baseline and 3 months in the control group and intervention group.

Supplementary file 5. Interpretation of the QPP – Percentage agreement in a selection of QPP questions

1  
2  
3  
4  
5  
6  
7  
8  
9  
10  
11  
12  
13  
14  
15  
16  
17  
18  
19  
20  
21  
22  
23  
24  
25  
26  
27  
28  
29  
30  
31  
32  
33  
34  
35  
36  
37  
38  
39  
40  
41  
42  
43  
44  
45  
46  
47  
48  
49  
50  
51  
52  
53  
54  
55  
56  
57  
58  
59  
60

For peer review only

1  
2  
3  
4  
5  
6  
7  
8  
9  
10  
11  
12  
13  
14  
15  
16  
17  
18  
19  
20  
21  
22  
23  
24  
25  
26  
27  
28  
29  
30  
31  
32  
33  
34  
35  
36  
37  
38  
39  
40  
41  
42  
43  
44  
45  
46  
47  
48  
49  
50  
51  
52  
53  
54  
55  
56  
57  
58  
59  
60

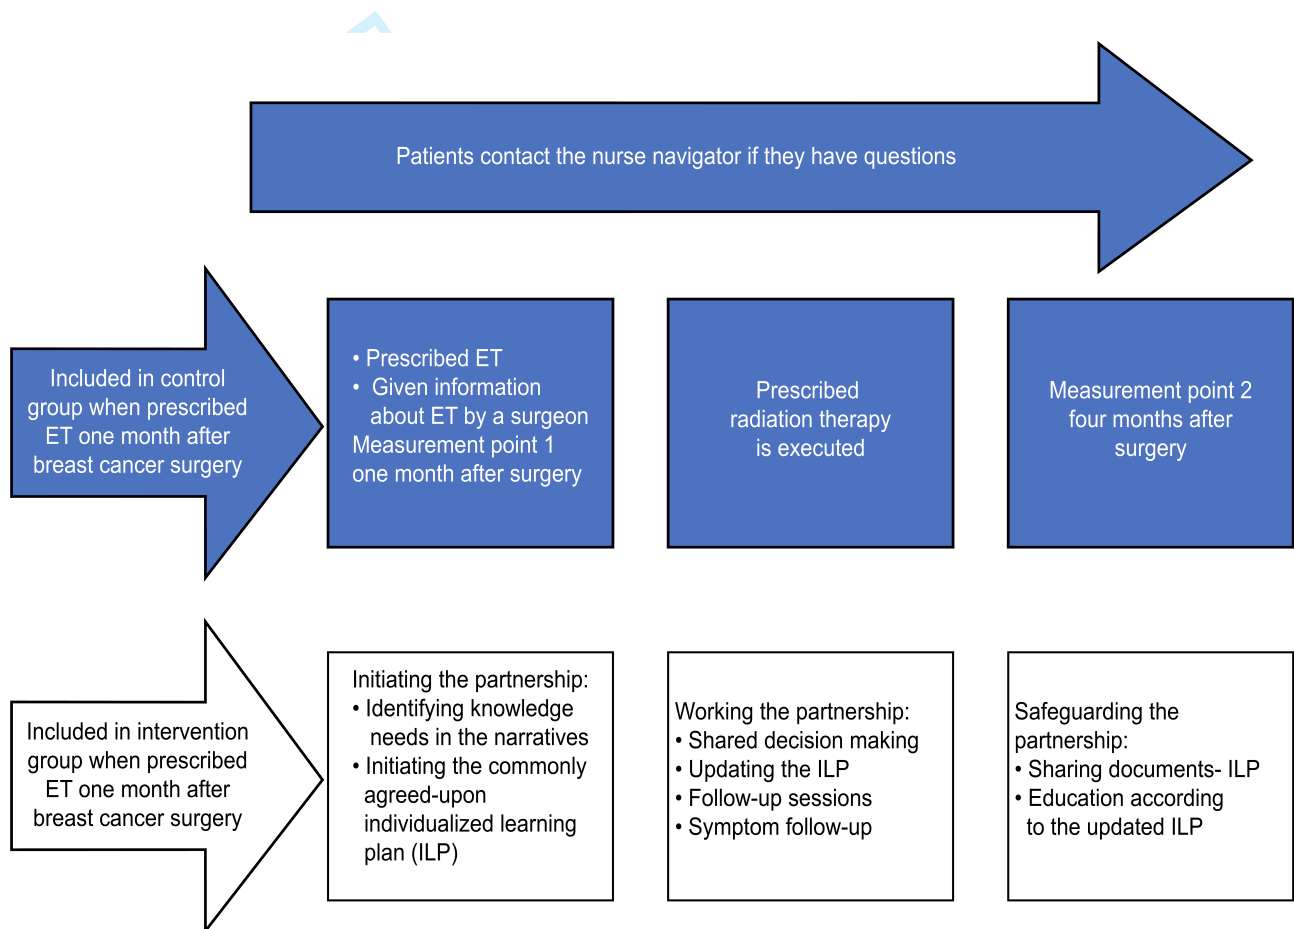



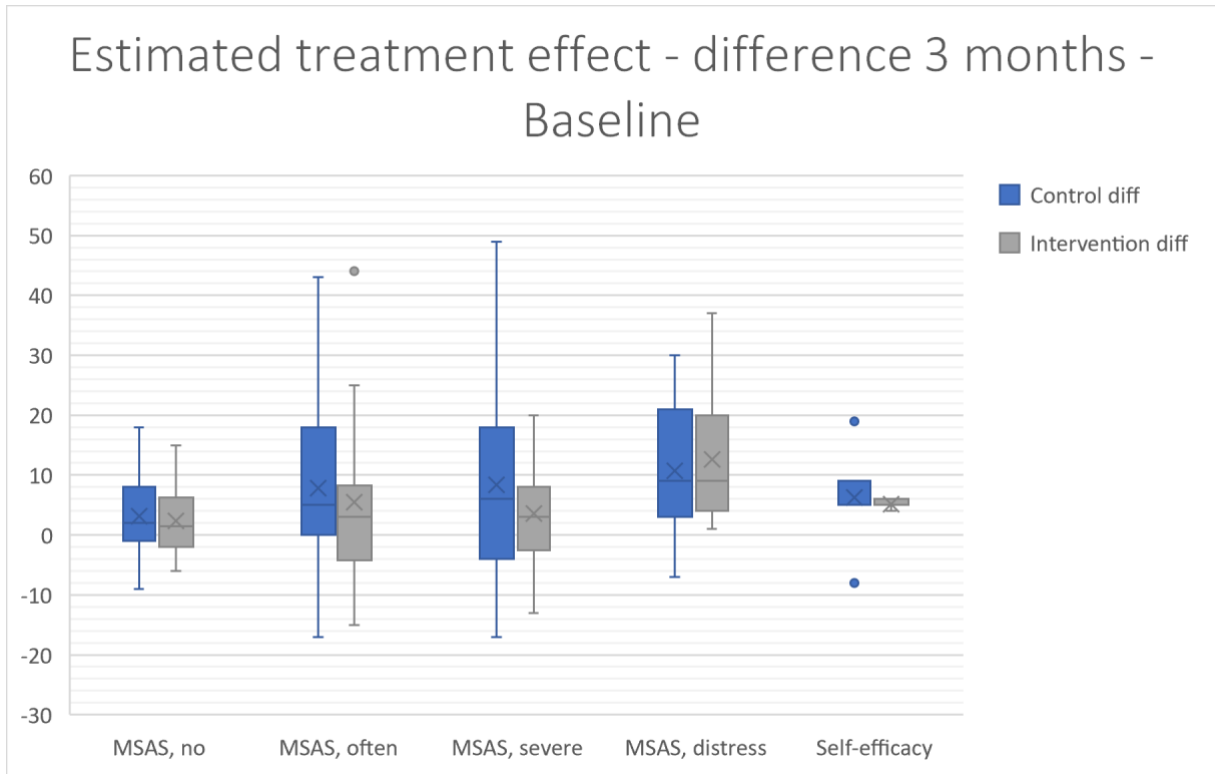

Peer review only

1  
2  
3  
4  
5  
6  
7  
8  
9  
10  
11  
12  
13  
14  
15  
16  
17  
18  
19  
20  
21  
22  
23  
24  
25  
26  
27  
28  
29  
30  
31  
32  
33  
34  
35  
36  
37  
38  
39  
40  
41  
42  
43  
44  
45  
46  
47  
48  
49  
50  
51  
52  
53  
54  
55  
56  
57  
58  
59  
60



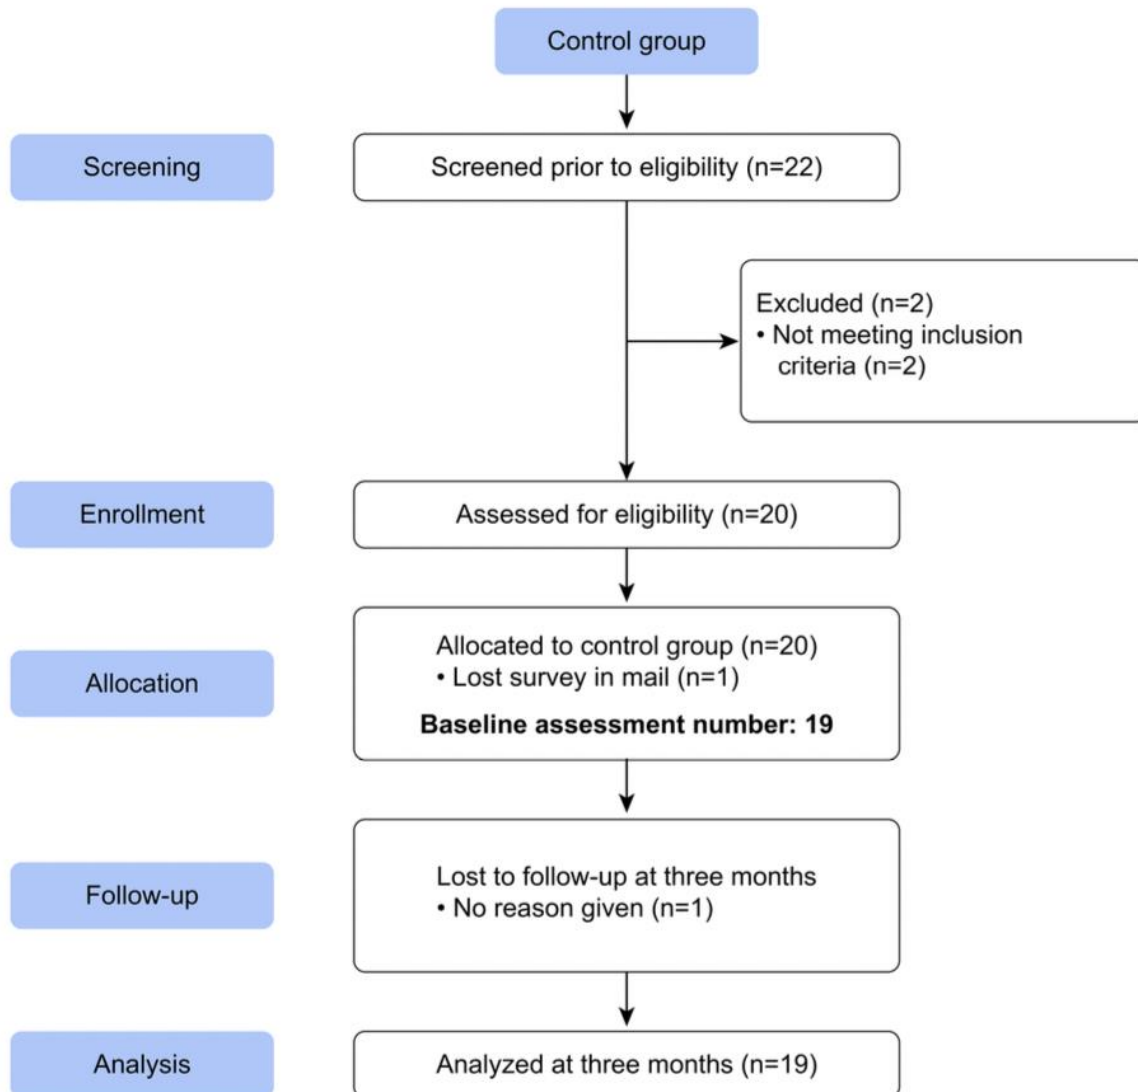

45 Supplementary file 1. Retention - CONSORT Flow diagram for the usual care group. Patients included  
46 September 2020 – December 2021.

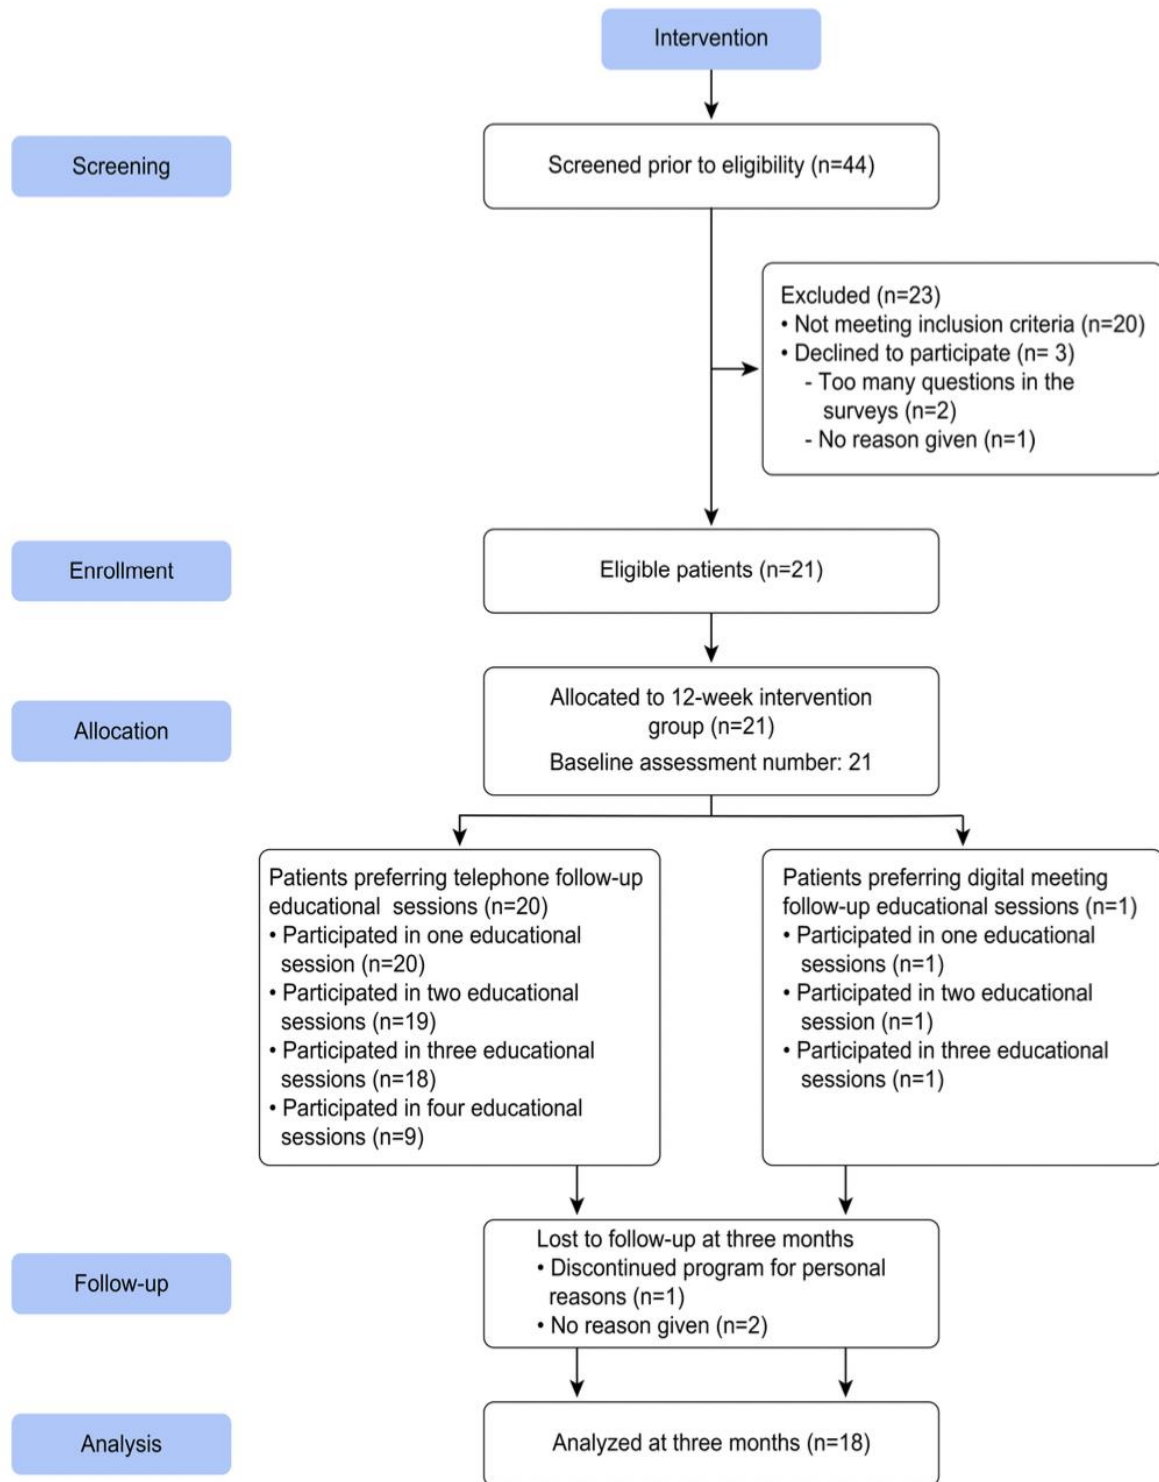

Supplementary file 2. Retention - CONSORT flow diagram for the person-centered support program group. Patients included December 2020 – March 2021.

## Supplementary file 3. Description of the education of the intervention nurse.

| <b>Before Lecture:</b> The intervention nurse is asked to specifically reflect on the following in the care setting:<br><i>Problems with endocrine therapy</i><br><i>Symptom management</i><br><i>Cocreation with patients, barriers, facilitators.</i>                                                                                                                                                                                                |                                                                                                                                                                                                                                                                                      |                                                                                                                                                                                                                                                                                                                                   |                                                                         |
|--------------------------------------------------------------------------------------------------------------------------------------------------------------------------------------------------------------------------------------------------------------------------------------------------------------------------------------------------------------------------------------------------------------------------------------------------------|--------------------------------------------------------------------------------------------------------------------------------------------------------------------------------------------------------------------------------------------------------------------------------------|-----------------------------------------------------------------------------------------------------------------------------------------------------------------------------------------------------------------------------------------------------------------------------------------------------------------------------------|-------------------------------------------------------------------------|
| Sessions                                                                                                                                                                                                                                                                                                                                                                                                                                               | Content                                                                                                                                                                                                                                                                              | Learning outcomes                                                                                                                                                                                                                                                                                                                 | Learning activities                                                     |
| 1                                                                                                                                                                                                                                                                                                                                                                                                                                                      | Core principles about endocrine therapy (ET <sup>1</sup> ), including side effects of ET and symptom management described in research.<br><br>Symptom management theory.                                                                                                             | -Describe symptom management methods.<br>-Suggest strategies for symptom management during ET.                                                                                                                                                                                                                                    | Clinical case discussions, microteaching sessions, dialogs, reflection. |
| <b>Before Lecture:</b> The intervention nurse is asked to reflect on practical situations in the care setting when <i>applying dialog and person-centered care (PCC<sup>2</sup>)</i> .                                                                                                                                                                                                                                                                 |                                                                                                                                                                                                                                                                                      |                                                                                                                                                                                                                                                                                                                                   |                                                                         |
| Session                                                                                                                                                                                                                                                                                                                                                                                                                                                | Content                                                                                                                                                                                                                                                                              | Learning outcomes                                                                                                                                                                                                                                                                                                                 | Learning activities                                                     |
| 2                                                                                                                                                                                                                                                                                                                                                                                                                                                      | Pedagogical theory.                                                                                                                                                                                                                                                                  | - Describe pedagogic strategies using dialog to increase patients' self-care.<br>- Describe pedagogical strategies to increase patient participation.<br>- Describe dialogical methodology that strengthens patient participation.<br>-Evaluate whether chosen pedagogical strategies increase patients' self-management ability. | Clinical case discussions, microteaching sessions, dialogs, reflection. |
| <b>Before Lecture:</b> The intervention nurse is asked to reflect on practical situations in the care setting using knowledge from Session 2 and <i>relate to PCC</i> in a care setting.                                                                                                                                                                                                                                                               |                                                                                                                                                                                                                                                                                      |                                                                                                                                                                                                                                                                                                                                   |                                                                         |
| Session                                                                                                                                                                                                                                                                                                                                                                                                                                                | Content                                                                                                                                                                                                                                                                              | Learning outcomes                                                                                                                                                                                                                                                                                                                 | Learning activities                                                     |
| 3                                                                                                                                                                                                                                                                                                                                                                                                                                                      | PCC in the clinical care setting.                                                                                                                                                                                                                                                    | -Describe PCC.                                                                                                                                                                                                                                                                                                                    | Clinical case discussions, microteaching sessions, dialogs, reflection. |
| <b>Before Lecture:</b> The intervention nurse evaluates the <i>gained knowledge about PCC</i> in a practical situation in the care setting.                                                                                                                                                                                                                                                                                                            |                                                                                                                                                                                                                                                                                      |                                                                                                                                                                                                                                                                                                                                   |                                                                         |
| Session                                                                                                                                                                                                                                                                                                                                                                                                                                                | Content                                                                                                                                                                                                                                                                              | Learning outcomes                                                                                                                                                                                                                                                                                                                 | Learning activities                                                     |
| 4                                                                                                                                                                                                                                                                                                                                                                                                                                                      | The three intervention components, i.e., individual education material, individualized learning plan, and a personalized reminder letter (Ahlstedt Karlsson et al. 2022) with a starting point in the contact nurse's experience from a practical situation in the clinical setting. | -Explain the components of the intervention.                                                                                                                                                                                                                                                                                      | Clinical case discussions, dialogs, reflection.                         |
| <b>After Lecture:</b> With a starting point in the newly gained knowledge, <i>apply PCC, knowledge about ET, pedagogical theory and the three components</i> in the intervention in a care setting.                                                                                                                                                                                                                                                    |                                                                                                                                                                                                                                                                                      |                                                                                                                                                                                                                                                                                                                                   |                                                                         |
| <b>Proficiency goal after completed education:</b><br>The intervention nurse can:<br>- Evaluate whether the proposed symptom management strategies increase the patient's management of ET-related symptoms.<br>- Assess whether the patient's need for care was met.<br>- Review and evaluate whether selected pedagogical strategies strengthen the patient's self-care ability.<br>- Evaluate the patient's participation in ET symptom management. |                                                                                                                                                                                                                                                                                      |                                                                                                                                                                                                                                                                                                                                   |                                                                         |
| <b>Evaluation ability after completed education:</b><br>The intervention nurse can:<br>- Suggest strategies for managing symptoms in relation with ET.<br>- Together with the patient, identify care needs.<br>- Apply pedagogical strategies that strengthen patients' self-care ability.<br>- Apply dialogical methodology that strengthens patients' participation.                                                                                 |                                                                                                                                                                                                                                                                                      |                                                                                                                                                                                                                                                                                                                                   |                                                                         |

Abbreviations: ET: Endocrine therapy, PCC: Person-centered care.

Supplementary file 4. Median differences at baseline and 3 months in the control group and intervention group.

|                              | Control                   |                        |                               | Intervention              |                          |                               | p value* |
|------------------------------|---------------------------|------------------------|-------------------------------|---------------------------|--------------------------|-------------------------------|----------|
|                              | Baseline no, Median (IQR) | 3 months, Median (IQR) | Change from baseline (median) | Baseline no, Median (IQR) | 3-month no, Median (IQR) | Change from baseline (median) |          |
| SE, median (IQR)             | 31 (27-40)                | 31 (22-39)             | 0.5                           | 30 (26-35)                | 30 (30-38)               | 0                             | 0.731    |
| MSAS, no median (IQR)        | 6 (3-11)                  | 9 (3-18)               | 2                             | 7 (3-13)                  | 10 (5-22)                | 1                             | 0.724    |
| MSAS, often, median (IQR)    | 11 (2-36)                 | 13 (6-38)              | 7.5                           | 14 (4-25)                 | 15 (7-49)                | 2                             | 0.504    |
| MSAS, severe, median (IQR)   | 12 (0-26)                 | 13 (5-52)              | 5                             | 10 (3-23)                 | 13 (6-40)                | 2                             | 0.393    |
| MSAS, distress, median (IQR) | 11 (0-28)                 | 12 (3-30)              | 5.5                           | 8 (2-19)                  | 12 (6-39)                | 2                             | 0.600    |

\*Mann–Whitney U test comparing changes from baseline between the control and intervention groups.

Abbreviations: Often: how often the patient had a symptom, Severe: how severe the symptom usually experienced by the patient was, Distress: how much the experienced symptom distressed or bothered the patient.

Supplementary file 5. Interpretation of the QPP – Percentage agreement in a selection of QPP questions

|                                                                                                   | Control 3 months, n (%) | Intervention 3 months, n (%) |
|---------------------------------------------------------------------------------------------------|-------------------------|------------------------------|
| 13. I received useful information on what I needed to be able to participate in my own care       | 16* (93.75%)            | 17* (88.24%)                 |
| 19. I had adequate information about my medicines, so I understood the effect and how to use them | 18* (77.78%)            | 18* (72.22%)                 |
| 20. I had an opportunity to share my experience with health care professionals                    | 15* (86.67%)            | 17* (82.35%)                 |
| 32. I had a good opportunity to confer in decisions about my own care                             | 14* (85.71%)            | 15* (73.33%)                 |
| 33. I had a good opportunity to participate in my own care                                        | 15* (86.67%)            | 12* (75.00%)                 |
| 34. My care was directed by my needs rather than the health care professionals' routines          | 16* (100%)              | 17* (82.35%)                 |

\*Caution: If less than 30, the results should be regarded with caution.

To measure perceived reality concerning the quality of care, every question was phrased as a statement. The response alternatives were given on a scale between 4 (Fully agree) and 1 (Do not agree at all).

Percentage in agreement represents the patients who answered 3 (Mostly agree) and 4 (Fully agree) divided by the total number of patients who answered 1-4 on the question. Answer 5 (Not applicable) is not included.

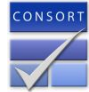

## CONSORT 2010 checklist of information to include when reporting a pilot or feasibility trial\*

| Section/Topic                    | Item No | Checklist item                                                                                                                                                                              | Reported on page No |
|----------------------------------|---------|---------------------------------------------------------------------------------------------------------------------------------------------------------------------------------------------|---------------------|
| <b>Title and abstract</b>        |         |                                                                                                                                                                                             |                     |
|                                  | 1a      | Identification as a pilot or feasibility randomised trial in the title                                                                                                                      | 1                   |
|                                  | 1b      | Structured summary of pilot trial design, methods, results, and conclusions (for specific guidance see CONSORT abstract extension for pilot trials)                                         | 1                   |
| <b>Introduction</b>              |         |                                                                                                                                                                                             |                     |
| Background and objectives        | 2a      | Scientific background and explanation of rationale for future definitive trial, and reasons for randomised pilot trial                                                                      | 4                   |
|                                  | 2b      | Specific objectives or research questions for pilot trial                                                                                                                                   | 5                   |
| <b>Methods</b>                   |         |                                                                                                                                                                                             |                     |
| Trial design                     | 3a      | Description of pilot trial design (such as parallel, factorial) including allocation ratio                                                                                                  | 5                   |
|                                  | 3b      | Important changes to methods after pilot trial commencement (such as eligibility criteria), with reasons                                                                                    | NA                  |
| Participants                     | 4a      | Eligibility criteria for participants                                                                                                                                                       | 6                   |
|                                  | 4b      | Settings and locations where the data were collected                                                                                                                                        | 6                   |
|                                  | 4c      | How participants were identified and consented                                                                                                                                              | 6                   |
| Interventions                    | 5       | The interventions for each group with sufficient details to allow replication, including how and when they were actually administered                                                       | 6-7                 |
| Outcomes                         | 6a      | Completely defined prespecified assessments or measurements to address each pilot trial objective specified in 2b, including how and when they were assessed                                | 8                   |
|                                  | 6b      | Any changes to pilot trial assessments or measurements after the pilot trial commenced, with reasons                                                                                        | NA                  |
|                                  | 6c      | If applicable, prespecified criteria used to judge whether, or how, to proceed with future definitive trial                                                                                 | NA                  |
| Sample size                      | 7a      | Rationale for numbers in the pilot trial                                                                                                                                                    | 7                   |
|                                  | 7b      | When applicable, explanation of any interim analyses and stopping guidelines                                                                                                                | NA                  |
| Randomisation:                   |         |                                                                                                                                                                                             |                     |
| Sequence generation              | 8a      | Method used to generate the random allocation sequence                                                                                                                                      | NA                  |
|                                  | 8b      | Type of randomisation(s); details of any restriction (such as blocking and block size)                                                                                                      | NA                  |
| Allocation concealment mechanism | 9       | Mechanism used to implement the random allocation sequence (such as sequentially numbered containers), describing any steps taken to conceal the sequence until interventions were assigned | NA                  |

|                                                      |     |                                                                                                                                                                                       |                                    |
|------------------------------------------------------|-----|---------------------------------------------------------------------------------------------------------------------------------------------------------------------------------------|------------------------------------|
| Implementation                                       | 10  | Who generated the random allocation sequence, who enrolled participants, and who assigned participants to interventions                                                               | NA                                 |
| Blinding                                             | 11a | If done, who was blinded after assignment to interventions (for example, participants, care providers, those assessing outcomes) and how                                              | NA                                 |
|                                                      | 11b | If relevant, description of the similarity of interventions                                                                                                                           | NA                                 |
| Statistical methods                                  | 12  | Methods used to address each pilot trial objective whether qualitative or quantitative                                                                                                | 9                                  |
| <b>Results</b>                                       |     |                                                                                                                                                                                       |                                    |
| Participant flow (a diagram is strongly recommended) | 13a | For each group, the numbers of participants who were approached and/or assessed for eligibility, randomly assigned, received intended treatment, and were assessed for each objective | 10                                 |
|                                                      | 13b | For each group, losses and exclusions after randomisation, together with reasons                                                                                                      | 10                                 |
| Recruitment                                          | 14a | Dates defining the periods of recruitment and follow-up                                                                                                                               | 10                                 |
|                                                      | 14b | Why the pilot trial ended or was stopped                                                                                                                                              | NA                                 |
| Baseline data                                        | 15  | A table showing baseline demographic and clinical characteristics for each group                                                                                                      | Table 1                            |
| Numbers analysed                                     | 16  | For each objective, number of participants (denominator) included in each analysis. If relevant, these numbers should be by randomised group                                          | Figure 1 and 2. Supplementary file |
| Outcomes and estimation                              | 17  | For each objective, results including expressions of uncertainty (such as 95% confidence interval) for any estimates. If relevant, these results should be by randomised group        | NA                                 |
| Ancillary analyses                                   | 18  | Results of any other analyses performed that could be used to inform the future definitive trial                                                                                      | NA                                 |
| Harms                                                | 19  | All important harms or unintended effects in each group (for specific guidance see CONSORT for harms)                                                                                 | NA                                 |
|                                                      | 19a | If relevant, other important unintended consequences                                                                                                                                  | NA                                 |
| <b>Discussion</b>                                    |     |                                                                                                                                                                                       |                                    |
| Limitations                                          | 20  | Pilot trial limitations, addressing sources of potential bias and remaining uncertainty about feasibility                                                                             | 14                                 |
| Generalisability                                     | 21  | Generalisability (applicability) of pilot trial methods and findings to future definitive trial and other studies                                                                     | 13                                 |
| Interpretation                                       | 22  | Interpretation consistent with pilot trial objectives and findings, balancing potential benefits and harms, and considering other relevant evidence                                   | 13                                 |
|                                                      | 22a | Implications for progression from pilot to future definitive trial, including any proposed amendments                                                                                 | 14                                 |
| <b>Other information</b>                             |     |                                                                                                                                                                                       |                                    |
| Registration                                         | 23  | Registration number for pilot trial and name of trial registry                                                                                                                        | NA                                 |
| Protocol                                             | 24  | Where the pilot trial protocol can be accessed, if available                                                                                                                          | NA                                 |
| Funding                                              | 25  | Sources of funding and other support (such as supply of drugs), role of funders                                                                                                       | 15                                 |

|  |    |                                                                                            |    |
|--|----|--------------------------------------------------------------------------------------------|----|
|  | 26 | Ethical approval or approval by research review committee, confirmed with reference number | 15 |
|--|----|--------------------------------------------------------------------------------------------|----|

1  
2  
3  
4  
5  
6  
7  
8  
9  
10  
11  
12  
13  
14  
15  
16  
17  
18  
19  
20  
21  
22  
23  
24  
25  
26  
27  
28  
29  
30  
31  
32  
33  
34  
35  
36  
37  
38  
39  
40  
41  
42  
43  
44  
45  
46

Citation: Eldridge SM, Chan CL, Campbell MJ, Bond CM, Hopewell S, Thabane L, et al. CONSORT 2010 statement: extension to randomised pilot and feasibility trials. *BMJ*. 2016;355.  
 \*We strongly recommend reading this statement in conjunction with the CONSORT 2010, extension to randomised pilot and feasibility trials, Explanation and Elaboration for important clarifications on all the items. If relevant, we also recommend reading CONSORT extensions for cluster randomised trials, non-inferiority and equivalence trials, non-pharmacological treatments, herbal interventions, and pragmatic trials. Additional extensions are forthcoming: for those and for up to date references relevant to this checklist, see [www.consort-statement.org](http://www.consort-statement.org).

For peer review only
