# Supplementary material for: Person-centred support programme (RESPECT intervention) for women with breast cancer treated with endocrine therapy: a feasibility study
Source: PubMed Central journal article supplement — BMJ Open. 2022 Oct 5;12(10):e060946. doi: 10.1136/bmjopen-2022-060946 (PMC9535178; doi:10.1136/bmjopen-2022-060946), 2022-10-05
Supplement: bmjopen-2022-060946supp001.pdf [file bmjopen-2022-060946supp001.pdf]

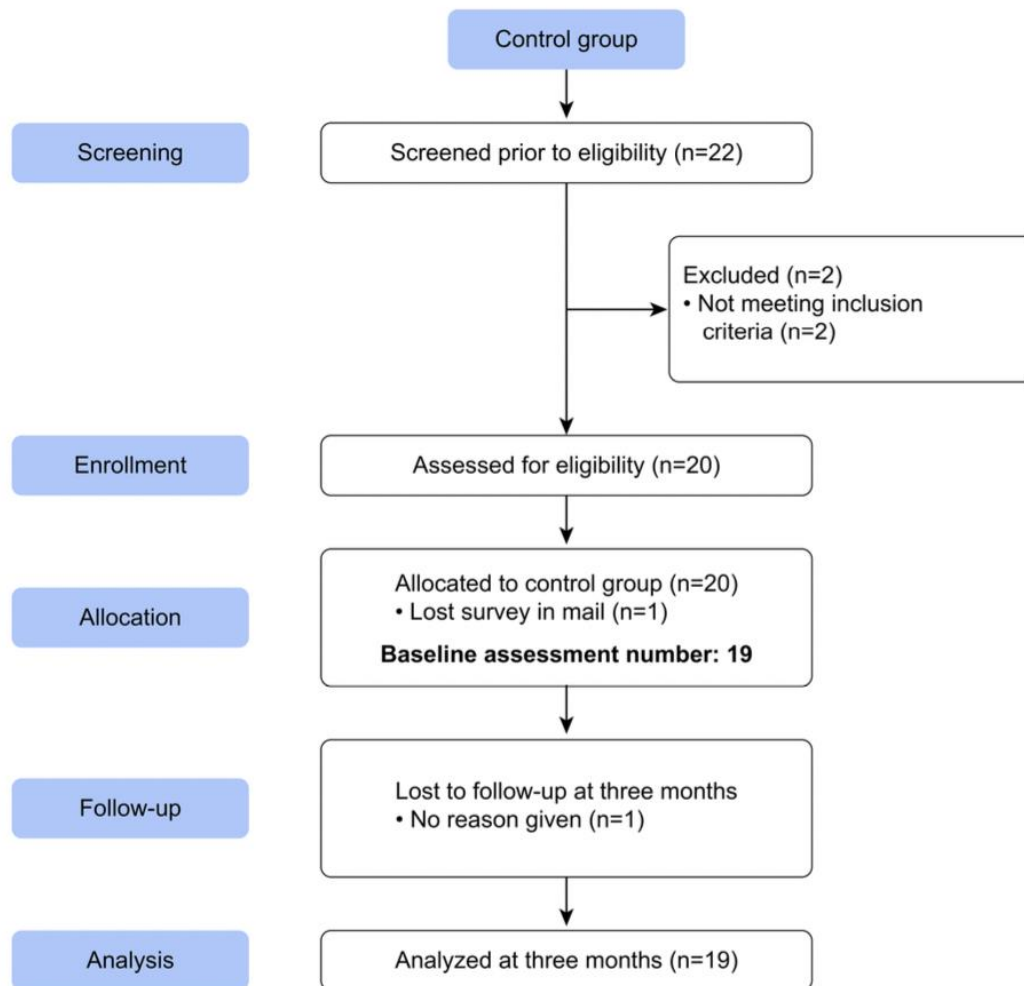

Supplementary file 1. Retention - CONSORT Flow diagram for the usual care group. Patients included September 2020 – December 2021.

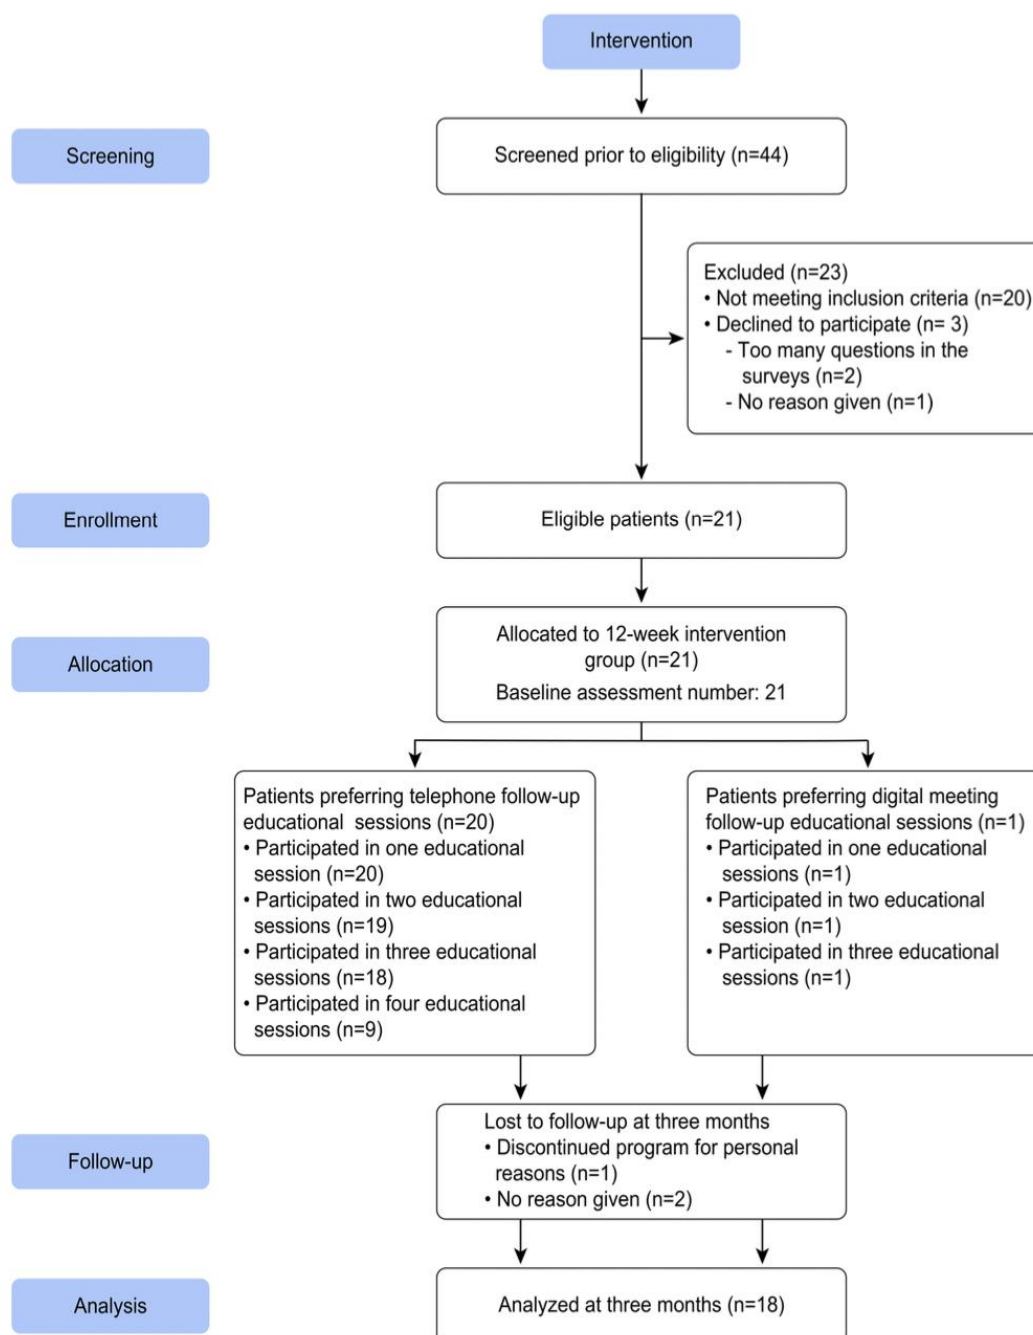

Supplementary file 2. Retention - CONSORT flow diagram for the person-centered support program group. Patients included December 2020 – March 2021.

## Supplementary file 3. Description of the education of the intervention nurse.

| <b>Before Lecture:</b> The intervention nurse is asked to specifically reflect on the following in the care setting:<br><i>Problems with endocrine therapy</i><br><i>Symptom management</i><br><i>Cocreation with patients, barriers, facilitators.</i>                                                                                                                                                                                                |                                                                                                                                                                                                                                                                                      |                                                                                                                                                                                                                                                                                                                                   |                                                                         |
|--------------------------------------------------------------------------------------------------------------------------------------------------------------------------------------------------------------------------------------------------------------------------------------------------------------------------------------------------------------------------------------------------------------------------------------------------------|--------------------------------------------------------------------------------------------------------------------------------------------------------------------------------------------------------------------------------------------------------------------------------------|-----------------------------------------------------------------------------------------------------------------------------------------------------------------------------------------------------------------------------------------------------------------------------------------------------------------------------------|-------------------------------------------------------------------------|
| Sessions                                                                                                                                                                                                                                                                                                                                                                                                                                               | Content                                                                                                                                                                                                                                                                              | Learning outcomes                                                                                                                                                                                                                                                                                                                 | Learning activities                                                     |
| 1                                                                                                                                                                                                                                                                                                                                                                                                                                                      | Core principles about endocrine therapy (ET <sup>1</sup> ), including side effects of ET and symptom management described in research.<br><br>Symptom management theory.                                                                                                             | -Describe symptom management methods.<br>-Suggest strategies for symptom management during ET.                                                                                                                                                                                                                                    | Clinical case discussions, microteaching sessions, dialogs, reflection. |
| <b>Before Lecture:</b> The intervention nurse is asked to reflect on practical situations in the care setting when <i>applying dialog and person-centered care (PCC<sup>2</sup>)</i> .                                                                                                                                                                                                                                                                 |                                                                                                                                                                                                                                                                                      |                                                                                                                                                                                                                                                                                                                                   |                                                                         |
| Session                                                                                                                                                                                                                                                                                                                                                                                                                                                | Content                                                                                                                                                                                                                                                                              | Learning outcomes                                                                                                                                                                                                                                                                                                                 | Learning activities                                                     |
| 2                                                                                                                                                                                                                                                                                                                                                                                                                                                      | Pedagogical theory.                                                                                                                                                                                                                                                                  | - Describe pedagogic strategies using dialog to increase patients' self-care.<br>- Describe pedagogical strategies to increase patient participation.<br>- Describe dialogical methodology that strengthens patient participation.<br>-Evaluate whether chosen pedagogical strategies increase patients' self-management ability. | Clinical case discussions, microteaching sessions, dialogs, reflection. |
| <b>Before Lecture:</b> The intervention nurse is asked to reflect on practical situations in the care setting using knowledge from Session 2 and <i>relate to PCC</i> in a care setting.                                                                                                                                                                                                                                                               |                                                                                                                                                                                                                                                                                      |                                                                                                                                                                                                                                                                                                                                   |                                                                         |
| Session                                                                                                                                                                                                                                                                                                                                                                                                                                                | Content                                                                                                                                                                                                                                                                              | Learning outcomes                                                                                                                                                                                                                                                                                                                 | Learning activities                                                     |
| 3                                                                                                                                                                                                                                                                                                                                                                                                                                                      | PCC in the clinical care setting.                                                                                                                                                                                                                                                    | -Describe PCC.                                                                                                                                                                                                                                                                                                                    | Clinical case discussions, microteaching sessions, dialogs, reflection. |
| <b>Before Lecture:</b> The intervention nurse evaluates the <i>gained knowledge about PCC</i> in a practical situation in the care setting.                                                                                                                                                                                                                                                                                                            |                                                                                                                                                                                                                                                                                      |                                                                                                                                                                                                                                                                                                                                   |                                                                         |
| Session                                                                                                                                                                                                                                                                                                                                                                                                                                                | Content                                                                                                                                                                                                                                                                              | Learning outcomes                                                                                                                                                                                                                                                                                                                 | Learning activities                                                     |
| 4                                                                                                                                                                                                                                                                                                                                                                                                                                                      | The three intervention components, i.e., individual education material, individualized learning plan, and a personalized reminder letter (Ahlstedt Karlsson et al. 2022) with a starting point in the contact nurse's experience from a practical situation in the clinical setting. | -Explain the components of the intervention.                                                                                                                                                                                                                                                                                      | Clinical case discussions, dialogs, reflection.                         |
| <b>After Lecture:</b> With a starting point in the newly gained knowledge, <i>apply PCC, knowledge about ET, pedagogical theory and the three components</i> in the intervention in a care setting.                                                                                                                                                                                                                                                    |                                                                                                                                                                                                                                                                                      |                                                                                                                                                                                                                                                                                                                                   |                                                                         |
| <b>Proficiency goal after completed education:</b><br>The intervention nurse can:<br>- Evaluate whether the proposed symptom management strategies increase the patient's management of ET-related symptoms.<br>- Assess whether the patient's need for care was met.<br>- Review and evaluate whether selected pedagogical strategies strengthen the patient's self-care ability.<br>- Evaluate the patient's participation in ET symptom management. |                                                                                                                                                                                                                                                                                      |                                                                                                                                                                                                                                                                                                                                   |                                                                         |
| <b>Evaluation ability after completed education:</b><br>The intervention nurse can:<br>- Suggest strategies for managing symptoms in relation with ET.<br>- Together with the patient, identify care needs.<br>- Apply pedagogical strategies that strengthen patients' self-care ability.<br>- Apply dialogical methodology that strengthens patients' participation.                                                                                 |                                                                                                                                                                                                                                                                                      |                                                                                                                                                                                                                                                                                                                                   |                                                                         |

Abbreviations: ET: Endocrine therapy, PCC: Person-centered care.

Supplementary file 4. Median differences at baseline and 3 months in the control group and intervention group.

|                              | Control                   |                        |                               | Intervention              |                          |                               | p value* |
|------------------------------|---------------------------|------------------------|-------------------------------|---------------------------|--------------------------|-------------------------------|----------|
|                              | Baseline no, Median (IQR) | 3 months, Median (IQR) | Change from baseline (median) | Baseline no, Median (IQR) | 3-month no, Median (IQR) | Change from baseline (median) |          |
| SE, median (IQR)             | 31 (27-40)                | 31 (22-39)             | 0.5                           | 30 (26-35)                | 30 (30-38)               | 0                             | 0.731    |
| MSAS, no median (IQR)        | 6 (3-11)                  | 9 (3-18)               | 2                             | 7 (3-13)                  | 10 (5-22)                | 1                             | 0.724    |
| MSAS, often, median (IQR)    | 11 (2-36)                 | 13 (6-38)              | 7.5                           | 14 (4-25)                 | 15 (7-49)                | 2                             | 0.504    |
| MSAS, severe, median (IQR)   | 12 (0-26)                 | 13 (5-52)              | 5                             | 10 (3-23)                 | 13 (6-40)                | 2                             | 0.393    |
| MSAS, distress, median (IQR) | 11 (0-28)                 | 12 (3-30)              | 5.5                           | 8 (2-19)                  | 12 (6-39)                | 2                             | 0.600    |

\*Mann-Whitney U test comparing changes from baseline between the control and intervention groups. Abbreviations: Often: how often the patient had a symptom, Severe: how severe the symptom usually experienced by the patient was, Distress: how much the experienced symptom distressed or bothered the patient.

Supplementary file 5. Interpretation of the QPP – Percentage agreement in a selection of QPP questions

|                                                                                                   | Control 3 months, n (%) | Intervention 3 months, n (%) |
|---------------------------------------------------------------------------------------------------|-------------------------|------------------------------|
| 13. I received useful information on what I needed to be able to participate in my own care       | 16* (93.75%)            | 17* (88.24%)                 |
| 19. I had adequate information about my medicines, so I understood the effect and how to use them | 18* (77.78%)            | 18* (72.22%)                 |
| 20. I had an opportunity to share my experience with health care professionals                    | 15* (86.67%)            | 17* (82.35%)                 |
| 32. I had a good opportunity to confer in decisions about my own care                             | 14* (85.71%)            | 15* (73.33%)                 |
| 33. I had a good opportunity to participate in my own care                                        | 15* (86.67%)            | 12* (75.00%)                 |
| 34. My care was directed by my needs rather than the health care professionals' routines          | 16* (100%)              | 17* (82.35%)                 |

\*Caution: If less than 30, the results should be regarded with caution.

To measure perceived reality concerning the quality of care, every question was phrased as a statement. The response alternatives were given on a scale between 4 (Fully agree) and 1 (Do not agree at all). Percentage in agreement represents the patients who answered 3 (Mostly agree) and 4 (Fully agree) divided by the total number of patients who answered 1-4 on the question. Answer 5 (Not applicable) is not included.
